# Supplementary material for: Functional Diversification of SRSF Protein Kinase to Control Ubiquitin-Dependent Neurodevelopmental Signaling
Source: PubMed Central journal article supplement (PMC7725506; doi:10.1016/j.devcel.2020.09.025), 2020-12-07
Supplement: mmc2.pdf [file mmc2.pdf]

# Developmental Cell

## Functional Diversification of SRSF Protein Kinase to Control Ubiquitin-Dependent Neurodevelopmental Signaling

### Graphical Abstract

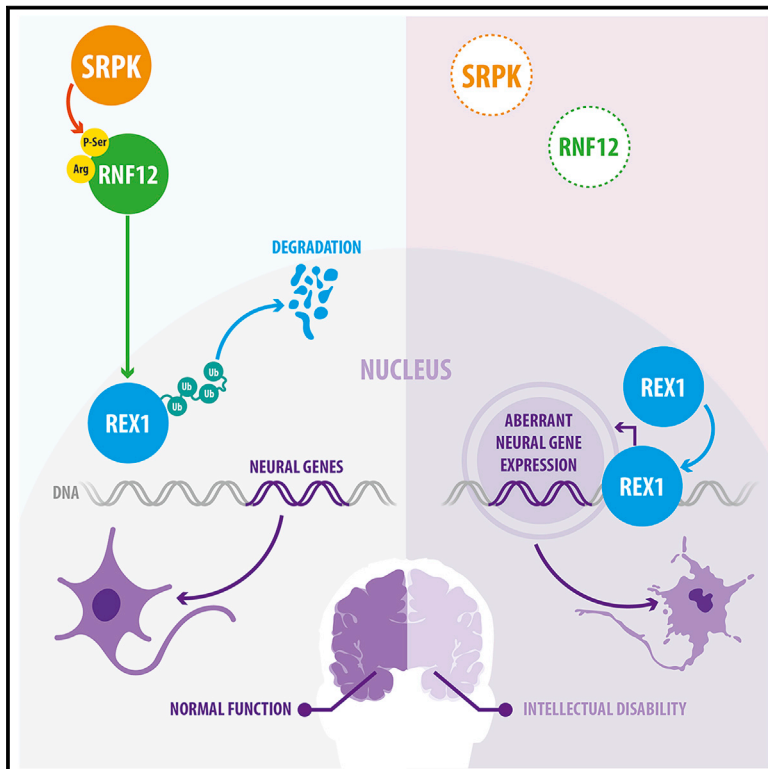

### Authors

Francisco Bustos, Anna Segarra-Fas, Gino Nardocci, ..., Renata F. Soares, Martin Montecino, Greg M. Findlay

### Correspondence

g.m.findlay@dundee.ac.uk

### In Brief

Bustos et al. show that SRPK splicing factor kinase has acquired a developmental function—phosphorylating the RNF12 E3 ubiquitin ligase to promote degradation of the transcription factor, REX1. This signaling pathway regulates a neurodevelopmental gene expression program and is mutated in patients with neurodevelopmental disorders.

### Highlights

- SRPK has acquired a developmental function regulating RNF12
- RNF12 phosphorylation by SRPK promotes E3 ligase activity and nuclear anchoring
- SRPK-RNF12 signaling to the REX1 transcription factor controls neural genes
- This signaling network is disrupted in neurodevelopmental disorders

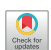

## Article

# Functional Diversification of SRSF Protein Kinase to Control Ubiquitin-Dependent Neurodevelopmental Signaling

Francisco Bustos,<sup>1</sup> Anna Segarra-Fas,<sup>1</sup> Gino Nardocci,<sup>2</sup> Andrew Cassidy,<sup>3</sup> Odetta Antico,<sup>1</sup> Lindsay Davidson,<sup>4</sup> Lennart Brandenburg,<sup>1</sup> Thomas J. Macartney,<sup>1</sup> Rachel Toth,<sup>1</sup> C. James Hastie,<sup>1</sup> Jennifer Moran,<sup>1</sup> Robert Gourlay,<sup>1</sup> Joby Varghese,<sup>1</sup> Renata F. Soares,<sup>1</sup> Martin Montecino,<sup>2</sup> and Greg M. Findlay<sup>1,5,\*</sup>

<sup>1</sup>The MRC Protein Phosphorylation and Ubiquitylation Unit, School of Life Sciences, the University of Dundee, Dundee DD1 5EH, UK

<sup>2</sup>Institute of Biomedical Sciences and FONDA Center for Genome Regulation, Universidad Andrés Bello, Santiago, Chile

<sup>3</sup>Tayside Centre for Genomic Analysis, School of Medicine, University of Dundee, Dundee DD1 9SY, UK

<sup>4</sup>School of Life Sciences, The University of Dundee, Dundee DD1 5EH, UK

<sup>5</sup>Lead Contact

\*Correspondence: [g.m.findlay@dundee.ac.uk](mailto:g.m.findlay@dundee.ac.uk)

<https://doi.org/10.1016/j.devcel.2020.09.025>

## SUMMARY

Conserved protein kinases with core cellular functions have been frequently redeployed during metazoan evolution to regulate specialized developmental processes. The Ser/Arg (SR)-rich splicing factor (SRSF) protein kinase (SRPK), which is implicated in splicing regulation, is one such conserved eukaryotic kinase. Surprisingly, we show that SRPK has acquired the capacity to control a neurodevelopmental ubiquitin signaling pathway. In mammalian embryonic stem cells and cultured neurons, SRPK phosphorylates Ser-Arg motifs in RNF12/RLIM, a key developmental E3 ubiquitin ligase that is mutated in an intellectual disability syndrome. Processive phosphorylation by SRPK stimulates RNF12-dependent ubiquitylation of nuclear transcription factor substrates, thereby acting to restrain a neural gene expression program that is aberrantly expressed in intellectual disability. SRPK family genes are also mutated in intellectual disability disorders, and patient-derived SRPK point mutations impair RNF12 phosphorylation. Our data reveal unappreciated functional diversification of SRPK to regulate ubiquitin signaling that ensures correct regulation of neurodevelopmental gene expression.

## INTRODUCTION

Signal transduction by protein kinases controls all aspects of eukaryotic biology (Cohen, 2002), from metabolism to complex developmental programs. As such, protein kinases involved in core eukaryotic processes have been redeployed during metazoan evolution to regulate specialized processes required for multicellular life. This is illustrated by acquisition of increasingly complex roles of the mitogen activated protein kinase (MAPK) signaling pathway from yeast to metazoans. In yeast, MAPK signaling controls simple unicellular functions, such as sensing mating pheromones and environmental stress (Chen and Thorner, 2007), while metazoan MAPK signaling has acquired the ability to regulate complex multicellular processes, including lineage-specific differentiation (Cowley et al., 1994; Traverse et al., 1992). Other highly conserved protein kinases may have undergone similar “functional diversification” to acquire new functions, thereby facilitating metazoan evolution.

In principle, functional diversification of protein kinases can be achieved via several non-mutually exclusive mechanisms: (1) evolutionary wiring of protein kinase pathways to newly evolved

cell-cell communication systems that control metazoan biology, such as receptor tyrosine kinases (Lim and Pawson, 2010), (2) evolution of new kinase-substrate relationships, and (3) evolution of specific kinase activity or expression profiles that differ according to developmental time and tissue context. These mechanisms individually or in combination have the capacity to drive functional diversification, enabling highly conserved eukaryotic protein kinases to evolve novel functions in the control of key metazoan processes.

The Ser-Arg rich splicing factor (SRSF) protein kinase (SRPK) family represent a prominent case study for functional diversification, as they perform core functions in mRNA splicing regulation that are thought to be conserved throughout eukaryotes (Dagher and Fu, 2001; Gui et al., 1994b; Siebel et al., 1999; Yeakley et al., 1999). SRPKs phosphorylate SRSFs, modulating their subcellular localization and regulating spliceosome assembly (Cao et al., 1997; Koizumi et al., 1999; Mathew et al., 2008; Xiao and Manley, 1997). Few non-splicing functions of SRPKs have been reported (Gou et al., 2020; Hong et al., 2012; Wang et al., 2017), and it remains unclear whether SRPKs have evolved further regulatory roles in metazoans. However, SRPK family

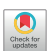

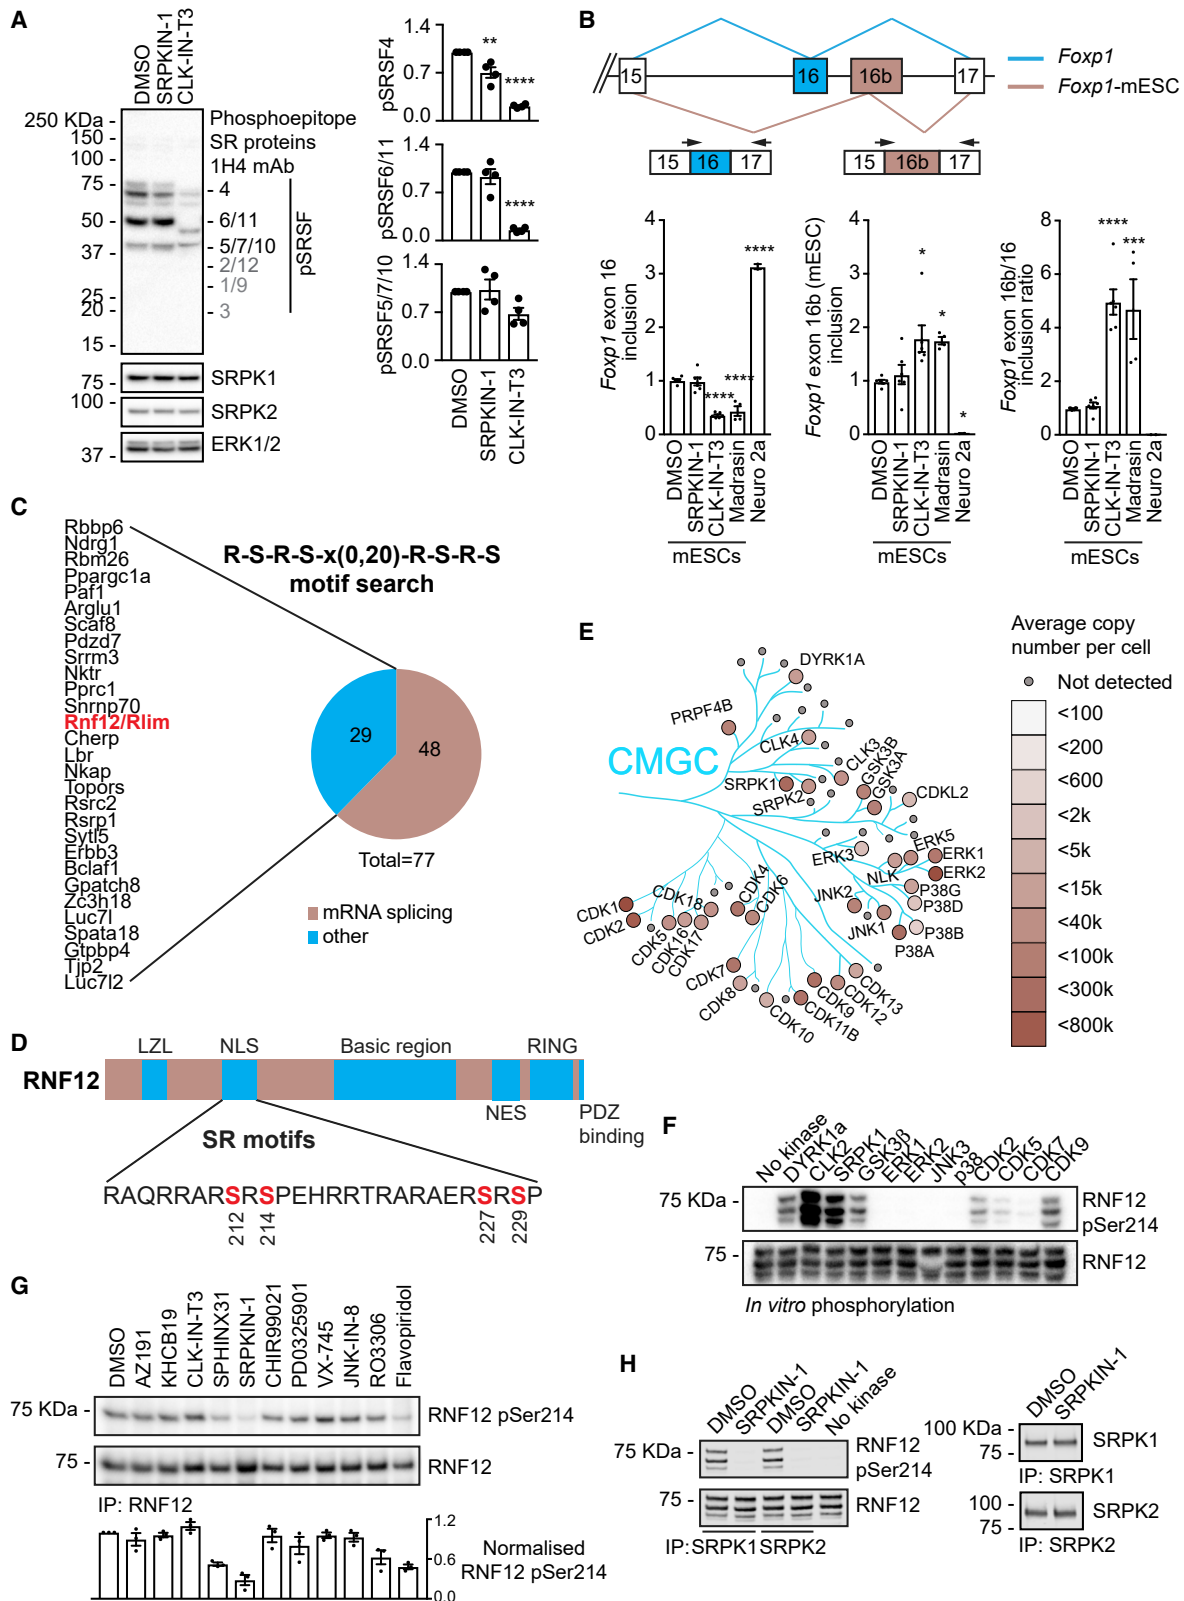

**Figure 1. Functional Diversification of SRPK to Control Developmental Ubiquitin Signaling**

(A) Wild-type (WT) mESCs were treated with 10  $\mu$ M SRPKIN-1 or CLK-IN-T3 for 4 h, and phosphorylation of Ser-Arg rich splicing factors (SRSF) was assessed (Left). SRSF phosphorylation, SRPK1, SRPK2, and ERK1/2 levels were determined by immunoblotting. Expected positions of SRSFs that are not detected are

(legend continued on next page)

members exhibit highly tissue-specific expression profiles (Nakagawa et al., 2005; Wang et al., 1998), suggesting that these protein kinases may indeed perform specialized functions required for multicellular development.

Here, we show that SRPKs have undergone functional diversification to acquire a critical role in mammalian development. Surprisingly, SRPK activity does not make a major contribution to SRSF phosphorylation or to a key splicing switch in mammalian embryonic stem cells. Instead, SRPK controls a ubiquitin signaling pathway to regulate expression of neurodevelopmental genes. In this pathway, SRPK phosphorylates a Ser-Arg-rich regulatory motif on the E3 ubiquitin ligase RNF12/RLIM (Barakat et al., 2011; Shin et al., 2010, 2014; Zhang et al., 2012), which is mutated in the X-linked intellectual disability disorder Tonne-Kalshauer syndrome (TOKAS) (Frints et al., 2019; Hu et al., 2016; Tonne et al., 2015). Processive RNF12 phosphorylation by SRPK stimulates ubiquitylation of transcription factor substrates to modulate expression of neural genes. Data mining indicates that SRPK family genes are also mutated in intellectual disability disorders, and SRPK3 point mutations, identified in patients, impair RNF12 phosphorylation. Thus, we uncover a previously unappreciated function for SRPK in neurodevelopmental signaling, indicating that functional diversification during eukaryotic evolution has enabled this highly conserved kinase family to govern complex metazoan processes beyond splicing regulation.

## RESULTS

### SRPK Activity Plays a Minor Role in Ser-Arg Rich Splicing Factor (SRSF) Phosphorylation in Embryonic Cells

SRPKs are thought to be key players in splicing regulation, controlling spliceosome assembly and activity (Dagher and Fu, 2001; Yeakley et al., 1999) via phosphorylation of SRSFs (Long and Caceres, 2009; Roscigno and Garcia-Blanco, 1995; Wu and Maniatis, 1993). Although splicing plays a critical role in stem cell regulation (Gabut et al., 2011; Salomonis et al., 2010), the first function of SRPK during early development in mammals has only recently been reported (Gou et al., 2020). This prompted us to examine the role of SRPK in mouse embry-

onic stem cells (mESCs). We first sought to confirm that SRPK activity is required for SRSF phosphorylation using an antibody that detects phosphorylated Ser-Arg-rich motifs. Surprisingly, in contrast with reports from somatic cells (Hatcher et al., 2018), phosphorylation of the major phosphorylated SRSF proteins in mESCs is either not significantly altered (SRSF6/11, SRSF5/7/10) or only slightly inhibited (SRSF4) by the selective pan-SRPK inhibitor, SRPKIN-1 (Hatcher et al., 2018) (Figure 1A). In contrast, treatment of mESCs with CLK-IN-T3, a selective inhibitor of the closely related CLK kinases (Funnell et al., 2017), which also phosphorylate SRSF splicing factors (Colwill et al., 1996), leads to widespread, robust inhibition of SRSF phosphorylation (Figure 1A). Our results therefore suggest that SRPKs are not the major SRSF kinases in mESCs.

This unexpected observation prompted us to examine whether SRPK activity is required for a key mESC alternative splicing switch, namely, inclusion of a specific exon within the developmental transcription factor FOXP1. mESCs express *Foxp1* mRNA that includes either exon 16b or exon 16, while differentiated somatic cells include only exon 16 (Figure 1B) (Gabut et al., 2011). As expected, the exon 16b-exon 16 switch requires mRNA splicing activity, as treatment of mESCs with the splicing inhibitor Madrasin (Pawellek et al., 2014) promotes inclusion of exon 16b over exon 16 (Figure 1B). However, selective inhibition of SRPK with SRPKIN-1 in mESCs has little effect on exon 16b-exon 16 inclusion (Figure 1B), consistent with the minor impact of SRPK inhibition on SRSF splicing factor phosphorylation. In contrast, selective inhibition of CLK by CLK-IN-T3 phenocopies splicing inhibition and promotes exon 16b inclusion while suppressing inclusion of exon 16 (Figure 1B). These data indicate that SRPK activity is not required for a FOXP1 alternative splicing switch in mESCs, implying that SRPK may have acquired other developmental function(s) during metazoan evolution.

### Identification of SRPK Substrates and Functions in Embryonic Stem Cells

In order to shed light on further developmental functions of SRPKs, we sought to identify SRPK substrates. Previous studies have demonstrated that SRPKs directly phosphorylate Ser-Arg repeat (SR) motifs (Gui et al., 1994a, 1994b; Wang et al., 1998).

shown in gray. Quantification of SRSF phosphorylation (Right). Data represented as mean  $\pm$  SEM (n = 4). One-way ANOVA followed by Tukey's multiple comparisons test; confidence level 95%. pSRSF4: (\*\*\*) p = 0.0032, (\*\*\*\*) p < 0.0001, pSRSF6/11: (\*\*\*\*) p < 0.0001.

(B) Splice variants of *Foxp1* mRNA including mutually exclusive exons 16 (*Foxp1*, GenBank: NM\_053202.2, cyan) or 16b (*Foxp1*-ESC, GenBank: XM\_030255074.1, tan) (Top). mESCs were treated with 1  $\mu$ M SRPKIN-1 or CLK-IN-T3, or 10  $\mu$ M Madrasin for 8 h, and *Foxp1* exon 16-16b incorporation determined using specific quantitative RT-PCR primers. Neuro 2a is a control for exon 16b exclusion in differentiated cells (Bottom). Data represented as mean  $\pm$  SEM (n = 3). One-way ANOVA followed by Tukey's multiple comparisons test; confidence level 95%. Exon 16 inclusion: (\*\*\*\*) p < 0.0001, Exon 16b inclusion: (\*) p = 0.0164, p = 0.0485, and p = 0.0489 (left to right). Ratio exon 16b/16: (\*\*\*\*) p < 0.0001, (\*\*\*) p = 0.0003.

(C) SRPK substrates predicted using ScanProsite and grouped according to UniProt functions.

(D) RNF12 phosphorylation sites detected by mass-spectrometry. LZL, leucine-zipper like; NLS, nuclear localization signal; NES, nuclear export signal; RING, RING E3 ubiquitin ligase catalytic domain.

(E) CMGC family kinase copy numbers in mESCs determined by quantitative proteomics and represented using Kinoviewer.

(F) CMGC kinase (200 mU) phosphorylation of the RNF12 SR-motif *in vitro* was determined by immunoblotting for RNF12 phospho-Ser214 and total RNF12.

(G) mESCs were treated with 10  $\mu$ M of the following kinase inhibitors: AZ-191 (DYRK1B), KH-CB19 (CLK-DYRK), CLK-IN-T3 (CLK), SPHINX31 (SRPK1), SRPKIN-1 (pan-SRPK), CHIR-99021 (GSK-3), PD-0325901 (MEK1/2), VX-745 (p38), JNK-IN-8 (JNK), RO-3306 (CDK1), and flavopiridol (CDK7/9) for 4 h and RNF12 SR-motif phosphorylation determined by immunoblotting for RNF12 phospho-Ser214 and total RNF12. Normalized RNF12 Ser214 phosphorylation is shown below. Data represented as mean  $\pm$  SEM (n = 3).

(H) SRPKIN-1 inhibition of SRPKs *in vivo* was determined by pre-treatment of mESCs with 10  $\mu$ M SRPKIN-1 for 4 h followed by SRPK1 or SRPK2 immunoprecipitation kinase assay using RNF12 as a substrate. RNF12 SR-motif phosphorylation was analyzed by immunoblotting for RNF12 phospho-Ser214 and RNF12. SRPK1 and SRPK2 levels are shown as a loading control, Related to Figure S1; Tables S1 and S2.

Therefore, we interrogated the mouse proteome for characteristic SRPK consensus motifs of RSRS repeats separated by a linker of 0–20 residues using ScanProsite (<https://prosite.expasy.org/scanprosite>). A similar approach has been employed previously to identify a neural-specific splicing factor (Calarco et al., 2009). This analysis uncovered 77 predicted SRPK substrates, of which 48 have annotated splicing functions, while a smaller cohort of 29 is not known to participate in splicing regulation (Figure 1C; Tables S1 and S2). Interestingly, several have annotated developmental roles, including PAF1, which controls RNA PolII and stem cell pluripotency (Ding et al., 2009; Ponnusamy et al., 2009), and TJP2/ZO-2, a component of tight junctions. Also in this dataset is RNF12/RLIM, a RING-type E3 ubiquitin ligase (Figure 1C), which controls key developmental processes, including imprinted X-chromosome inactivation (Shin et al., 2014), and stem cell maintenance and differentiation (Bustos et al., 2018; Zhang et al., 2012). RNF12 variants cause an X-linked neurodevelopmental disorder termed as TOKAS (Frints et al., 2019; Hu et al., 2016; Tønne et al., 2015), which is underpinned by impaired RNF12 E3 ubiquitin ligase activity resulting in deregulated neuronal differentiation (Bustos et al., 2018). Thus, we hypothesized that SRPK phosphorylates and regulates RNF12, representing unappreciated functional diversification of SRPKs into developmental signaling.

### The RNF12 SR-Motifs Are Phosphorylated by SRPK and Other CMGC Family Kinases

Previous work has shown that RNF12 is phosphorylated at the SR-motifs (Jiao et al., 2013), although the kinase(s) have not been identified. In order to confirm that RNF12 SR-motifs are phosphorylated *in vivo*, we performed immunoprecipitation mass spectrometry. RNF12 phosphorylation was robustly detected at two conserved sites in mESCs—the SR-motifs encompassing Ser212/214/227/229 and an unstudied Ser163 site (Figure 1D; Table S3)—confirming that the SR-motifs are major sites of RNF12 phosphorylation.

The RNF12 SR-motifs consist of tandem RpSRpSP sequences (Figure 1D) flanking a nuclear localization signal (NLS), which resemble sequences phosphorylated by SRPKs and several other CMGC kinase sub-families. Absolute quantitative proteomics shows that many CMGC family kinases, including SRPKs, are expressed in mESCs (Figures 1E and S1A). Thus, we employed a representative CMGC kinase panel to identify kinases that directly phosphorylate RNF12 *in vitro*. GSK-3 $\beta$ , CDK2, CDK9, and DYRK1A readily phosphorylate RNF12 at Ser214 within the SR-motifs (Figure 1F), while SRPK1 or the closely related kinase CLK2 give a higher level of RNF12 Ser214 phosphorylation (Figure 1F). The ERK subfamily of CMGC kinases, including ERK2, JNK, and p38, do not appreciably phosphorylate RNF12 at Ser214 (Figure 1F). These data identify SRPK and closely related kinases as strong candidates for catalyzing RNF12 SR-motif phosphorylation.

### A Covalent SRPK Inhibitor Ablates RNF12 SR-Motif Phosphorylation

In order to identify the kinase that phosphorylates the RNF12 SR-motifs *in vivo*, we assembled a panel of kinase inhibitors that selectively inhibit CMGC family members. Of 12 CMGC family kinase inhibitors, a selective covalent inhibitor of SRPKs, SRPKIN-

1 (Hatcher et al., 2018), had the greatest impact on the RNF12 phospho-Ser214/total ratio in mESCs (Figure 1G). The CDK7/9 inhibitor flavopiridol and the CDK1 inhibitor RO-3306 also have some effect, while the pan-CLK inhibitor CLK-IN-T3 has little impact on RNF12 phospho-Ser214/total ratio (Figure 1G). Interestingly, the structurally unrelated SRPK1 inhibitor SPHINX31 (Batson et al., 2017) has a minor effect on RNF12 Ser214 phosphorylation (Figure 1G), which is explained by the observation that SRPKIN-1 is ~10-fold and ~300-fold more potent toward SRPK1 than SPHINX31 and another commonly used SRPK inhibitor, SRPIN-340 (Fukuhara et al., 2006), respectively (Figure S1B). Furthermore, only SRPKIN-1 potently inhibited SRPK2 (Figure S1B), which is the other major SRPK isoform expressed in mESCs (Figures 1E, S1A, and S1C). Indeed, SRPK1 and SRPK2 are potently inhibited by SRPKIN-1 *in vivo*, as measured by the ability of SRPK1 or SRPK2 immunoprecipitates to phosphorylate RNF12 (Figure 1H). Our data therefore propose SRPK1/2 as candidate RNF12 SR-motif kinases.

### Widespread, Selective RNF12 SR-Motif Phosphorylation by SRPK

Phosphoproteomic analysis suggests that RNF12 is phosphorylated at Ser212, Ser214, Ser227, and Ser229 within the SR-motifs (Jiao et al., 2013) (Figure 1D; Table S3). In order to globally assess phosphorylation of these sites, we devised a phos-tag approach, which retards the mobility of phosphorylated proteins on SDS-PAGE (Kinoshita et al., 2006). RNF12 is phosphorylated to high stoichiometry at all Ser residues within the SR-motif, as mutation of each increases RNF12 mobility (Figure 2A). Interestingly, mutation of Ser214 and Ser229 disrupts RNF12 phosphorylation to a similar extent as mutation of all four sites (4xSA; Figure 2A), suggesting that RNF12 SR-motifs undergo hierarchical phosphorylation with C- to N-terminal processivity characteristic of SRPK substrates (Ma et al., 2008; Ngo et al., 2008). Importantly, an RNF12 4xSA mutant displays phos-tag mobility similar to that of dephosphorylated RNF12 (Figure 2B).

In order to determine whether SRPKs and/or other kinases phosphorylate further sites within the RNF12 SR-motifs, we again screened our CMGC kinase inhibitor panel in combination with RNF12 phos-tag analysis. Of these, only SRPKIN-1 drove a major dephosphorylation of the RNF12 SR-motif (Figure 2C). In contrast, the SRPK1 selective inhibitor SPHINX31 and pan-CLK inhibitor CLK-IN-T3 showed a minor effect on RNF12 phosphorylation (Figure 2C), while the CDK7/9 inhibitor flavopiridol and the CDK1 inhibitor RO-3306, which also suppress the RNF12 phospho-Ser214/total ratio (Figure 1G), had little impact. SRPKIN-1 treatment led to RNF12 SR-motif de-phosphorylation at concentrations as low as 1  $\mu$ M (Figure 2D) and within 1–2 h (Figure S2A). Furthermore, the high-mobility form of RNF12 was completely dephosphorylated at Ser214 upon SRPKIN-1 treatment (Figure 2E), indicating that SRPKs mediate widespread RNF12 SR-motif phosphorylation. In support of this notion, mass spectrometry indicated that SRPKs directly phosphorylate all four Ser residues within the RNF12 SR-motif *in vitro* (Figure 2F; Table S4). Furthermore, SRPK is highly selective for the RNF12 SR-motif, phosphorylating wild-type RNF12 but not a mutant in which the SR-motif is mutated (4xSA;

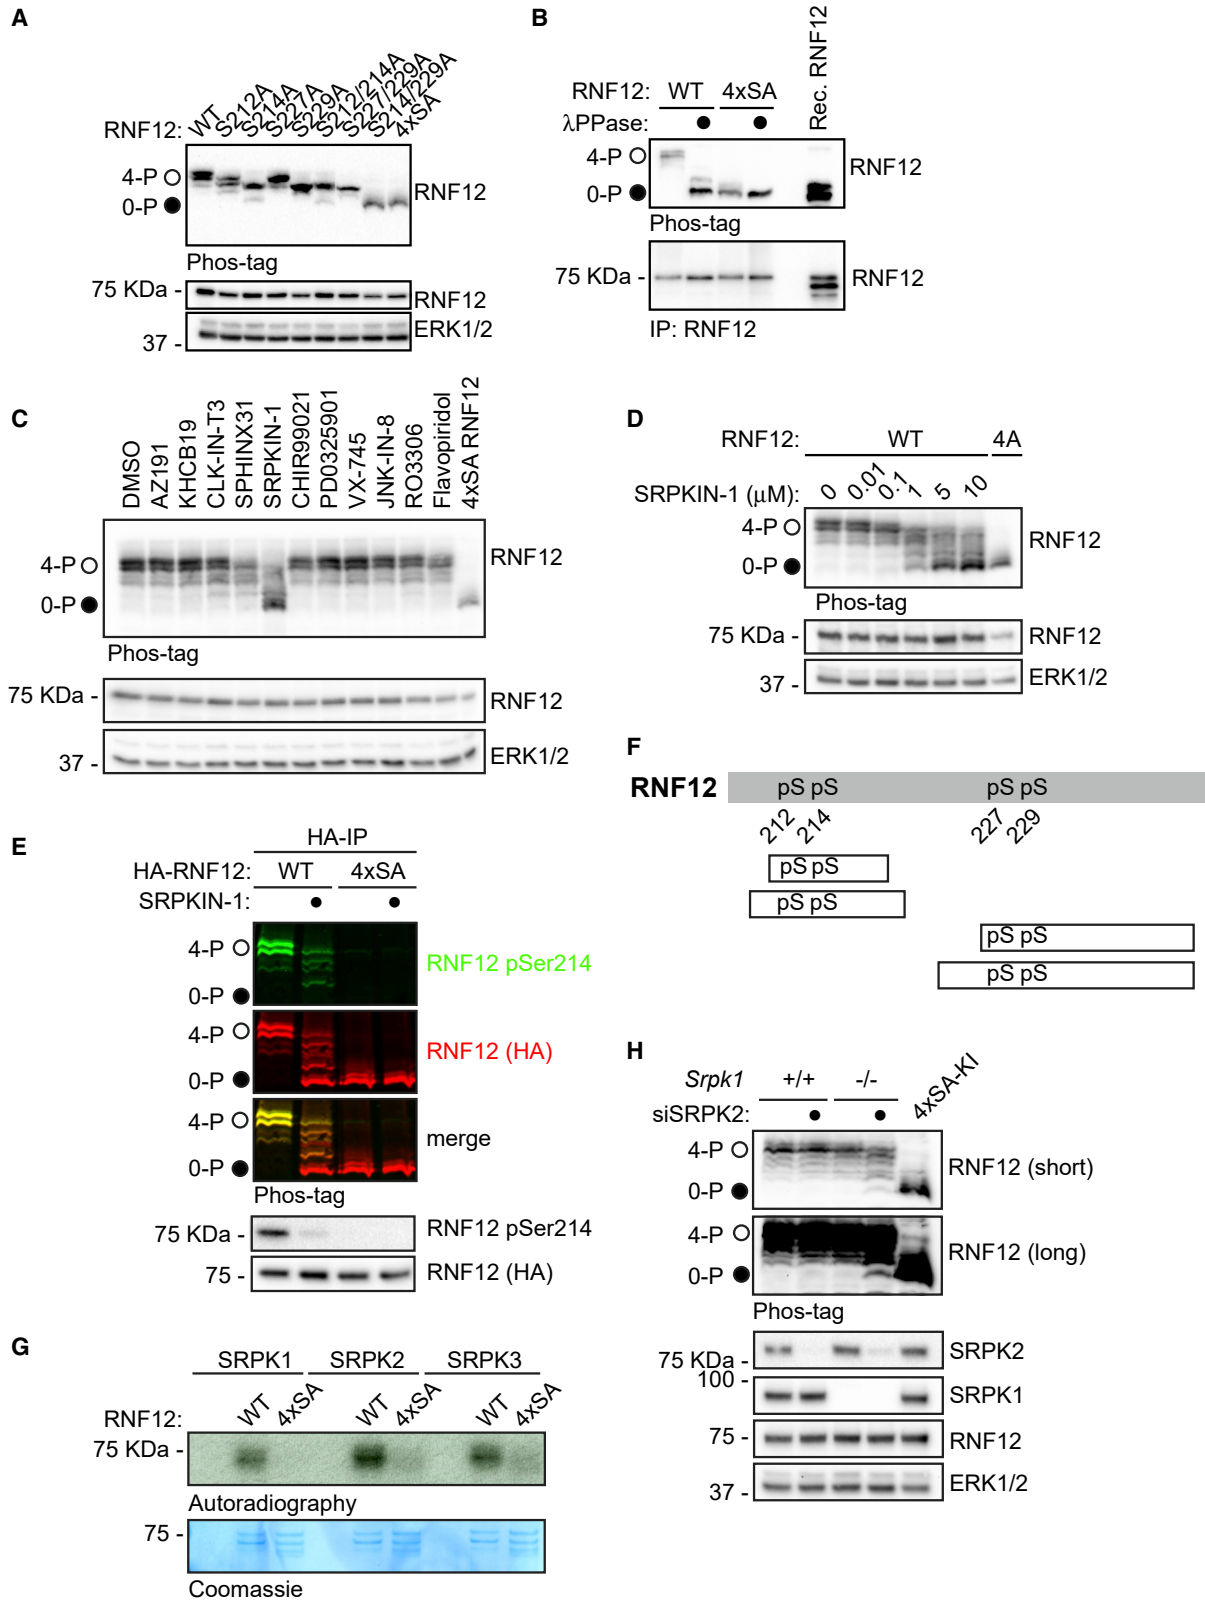

(legend on next page)

Figure 2G). In summary, our data uncovered a major role for SRPKs in phosphorylating the RNF12 SR-motif.

### Further Evidence that SRPK1/2 Are RNF12 SR-Motif Kinases

In order to confirm that SRPK1/2 activity is responsible for RNF12 SR-motif phosphorylation, we first determined SRPKIN-1 kinase inhibition specificity. Consistent with previous kinase interaction data (Hatcher et al., 2018), SRPKIN-1 is highly specific for SRPK1 inhibition compared with 49 other kinases (Figure S2B). Furthermore, inhibitors of major SRPKIN-1 off-target kinases, including CHK2, PLK1, and DYRK1A, did not impact RNF12 SR-motif phosphorylation *in vivo* (Figure S2C). In addition, RNF12 SR-motif phosphorylation was inhibited by SRPKIN-1 in washout assays, where SRPKIN-1 remained covalently bound to SRPKs but off-target kinases were removed (Hatcher et al., 2018) (Figure S2D).

To further substantiate the role of SRPK1/2 in RNF12 SR-motif phosphorylation, we sought to generate *Srpk1*<sup>-/-</sup>:*Srpk2*<sup>-/-</sup> mESC lines using CRISPR-Cas9. Although we were able to obtain *Srpk1*<sup>-/-</sup> and *Srpk2*<sup>-/-</sup> mESC lines (Figure S2E), no *Srpk1*<sup>-/-</sup>:*Srpk2*<sup>-/-</sup> mESC lines were recovered, suggesting that SRPK1/2 perform redundant functions in mESCs. Accordingly, RNF12 SR-motif phosphorylation was unaffected in *Srpk1*<sup>-/-</sup> and *Srpk2*<sup>-/-</sup> mESCs (Figure S2E). We therefore sought to deplete SRPK2 in *Srpk1*<sup>-/-</sup> mESCs using siRNA. Partial depletion of SRPK2 expression in the absence of SRPK1 led to the appearance of a fraction of completely dephosphorylated RNF12 (Figure 2H), providing further evidence that SRPK1/2 phosphorylates the RNF12 SR-motif in mESCs. However, as several closely related CMGC family kinases, including CLK and DYRK, are expressed (Figure 1E) and able to phosphorylate RNF12 at Ser214 *in vitro* (Figure 1F), these kinases may also contribute to RNF12 SR-motif phosphorylation *in vivo*.

### RNF12 SR-Motif Phosphorylation Drives Nuclear Anchoring

We then explored functions of the SRPK1/2-RNF12 pathway using RNF12 SR-motif knockin (KI) mutant mESCs. Employing CRISPR-Cas9, we engineered RNF12 4xSA-KI mESCs, which cannot be phosphorylated at the SR-motifs, and RNF12 ΔSR-

KI mESCs, in which residues 206–229 of the SR-motif are deleted. We also engineered control RNF12 wild-type (WT)-KI mESCs and catalytically inactive RNF12 W576Y-KI mESCs. All mutants are expressed at similar levels and have a similar half-life (Figure S3A), but RNF12 4xSA is not phosphorylated at the SR-motifs (Figure S3B).

As RNF12 SR-motifs flank a NLS (Jiao et al., 2013), we used KI mutant mESC lines to investigate the role of SR-motif phosphorylation in subcellular localization. Wild-type RNF12 (RNF12 WT-KI) was localized entirely in the nucleus (Figure 3A), while RNF12 4xSA-KI and RNF12 ΔSR-KI showed significant staining in both the nucleus and cytosol (Figure 3A, nucleus/cytosol ratio: WT-KI = 13.11, 4xSA-KI = 1.39, ΔSR-KI = 0.84), indicating that RNF12-SR-motif phosphorylation promotes, but is not essential for, nuclear localization. In support of this, RNF12 4xSA was primarily nuclear in mESCs treated with the CRM nuclear export inhibitor leptomycin B (LMB) (Figure 3B, 4xSA-KI nucleus/cytosol ratio: Control = 1.63, LMB = 4.08). SRPK1 and SRPK2 were largely cytosolic, with some nuclear staining, particularly for SRPK2 (Figure 3C, cytosol/nucleus ratio: SRPK1 = 4.80, SRPK2 = 2.71), consistent with the notion that these kinases function outside the nucleus (Ding et al., 2006; Jang et al., 2009). Taken together, our data indicate that SRPK phosphorylation of the RNF12 SR-motif drives RNF12 nuclear anchoring but is not critical for nuclear translocation.

In light of these results, we tested whether RNF12 SR-motif phosphorylation is required for efficient degradation of nuclear substrates. A major RNF12 substrate is the REX1/ZFP42 transcription factor, which mediates RNF12 function in X-chromosome inactivation (Gontan et al., 2012, 2018). We first investigated the importance of RNF12 SR-motif phosphorylation for REX1 substrate engagement. RNF12-REX1 interaction was reduced in RNF12 4xSA-KI and RNF12 ΔSR-KI mESCs (Figure 3D), suggesting that SR-motif phosphorylation promotes RNF12 delivery to key nuclear substrates. Consistent with this notion, increased REX1 protein levels were observed in RNF12 4xSA-KI and RNF12 ΔSR-KI mESCs, to levels approaching that of catalytically inactive RNF12 W576Y-KI mESCs (Figure 3E). Furthermore, REX1 stability was increased in RNF12 4xSA KI, RNF12 ΔSR-KI, and RNF12 W576Y-KI mESCs, compared with RNF12 WT-KI control mESCs (Figure 3F). These data

### Figure 2. RNF12/RLIM E3 Ubiquitin Ligase Is Selectively Phosphorylated by SRPKs at a SR-Rich Motif

(A) RNF12-deficient (*Rlim*<sup>-/-</sup>) mESCs were transfected with WT RNF12 or the indicated point mutants and RNF12 SR-motif phosphorylation analyzed by phos-tag immunoblotting for RNF12. Fully phosphorylated (4-P) and unphosphorylated (0-P) RNF12 SR-motifs are indicated by open (○) and closed (●) circles, respectively. RNF12 4xSA = S212A/S214A/S227A/S229A.

(B) *Rlim*<sup>-/-</sup> mESCs were transfected with the indicated RNF12 constructs and lysates treated with λ-phosphatase and analyzed by phos-tag immunoblotting for RNF12. Unphosphorylated recombinant RNF12 is included as a control.

(C) mESCs were treated with 10 μM of the following kinase inhibitors: AZ-191 (DYRK1B), KH-CB19 (CLK-DYRK), CLK-IN-T3 (CLK), SPHINX31 (SRPK1), SRPKIN-1 (pan-SRPK), CHIR-99021 (GSK-3), PD-0325901 (MEK1/2), VX-745 (p38), JNK-IN-8 (JNK), RO-3306 (CDK1), and flavopiridol (CDK7/9) for 4 h and RNF12 SR-motif phosphorylation analyzed by phos-tag immunoblotting for RNF12. RNF12 4xSA is included as an unphosphorylated control.

(D) mESCs were treated with the indicated concentrations of SRPKIN-1 for 4 h and RNF12 SR-motif phosphorylation analyzed by phos-tag immunoblotting for RNF12.

(E) mESCs were treated with 10 μM SRPKIN-1 for 4 h and RNF12 phosphorylation analyzed from HA-RNF12 immunoprecipitates via RNF12 phos-tag and phospho-Ser214 immunoblotting using multiplex infrared immunoblot.

(F) Phosphorylated peptides detected by mass spectrometry following *in vitro* phosphorylation of RNF12 by SRPK1. pS, phospho-serine.

(G) Autoradiography of RNF12 WT or S212A/S214A/S227A/S229A (4xSA) following a radioactive kinase reaction with SRPK1, SRPK2, or SRPK3. RNF12 protein is detected by Coomassie staining.

(H) *Srpk1*<sup>+/+</sup> and *Srpk1*<sup>-/-</sup> mESCs were transfected with control or SRPK2 siRNA and RNF12 SR-motif phosphorylation analyzed by phos-tag immunoblotting for RNF12. SRPK2, SRPK1, RNF12, and ERK1/2 levels were determined by immunoblotting.

Related to Figure S2; Tables S3 and S4.

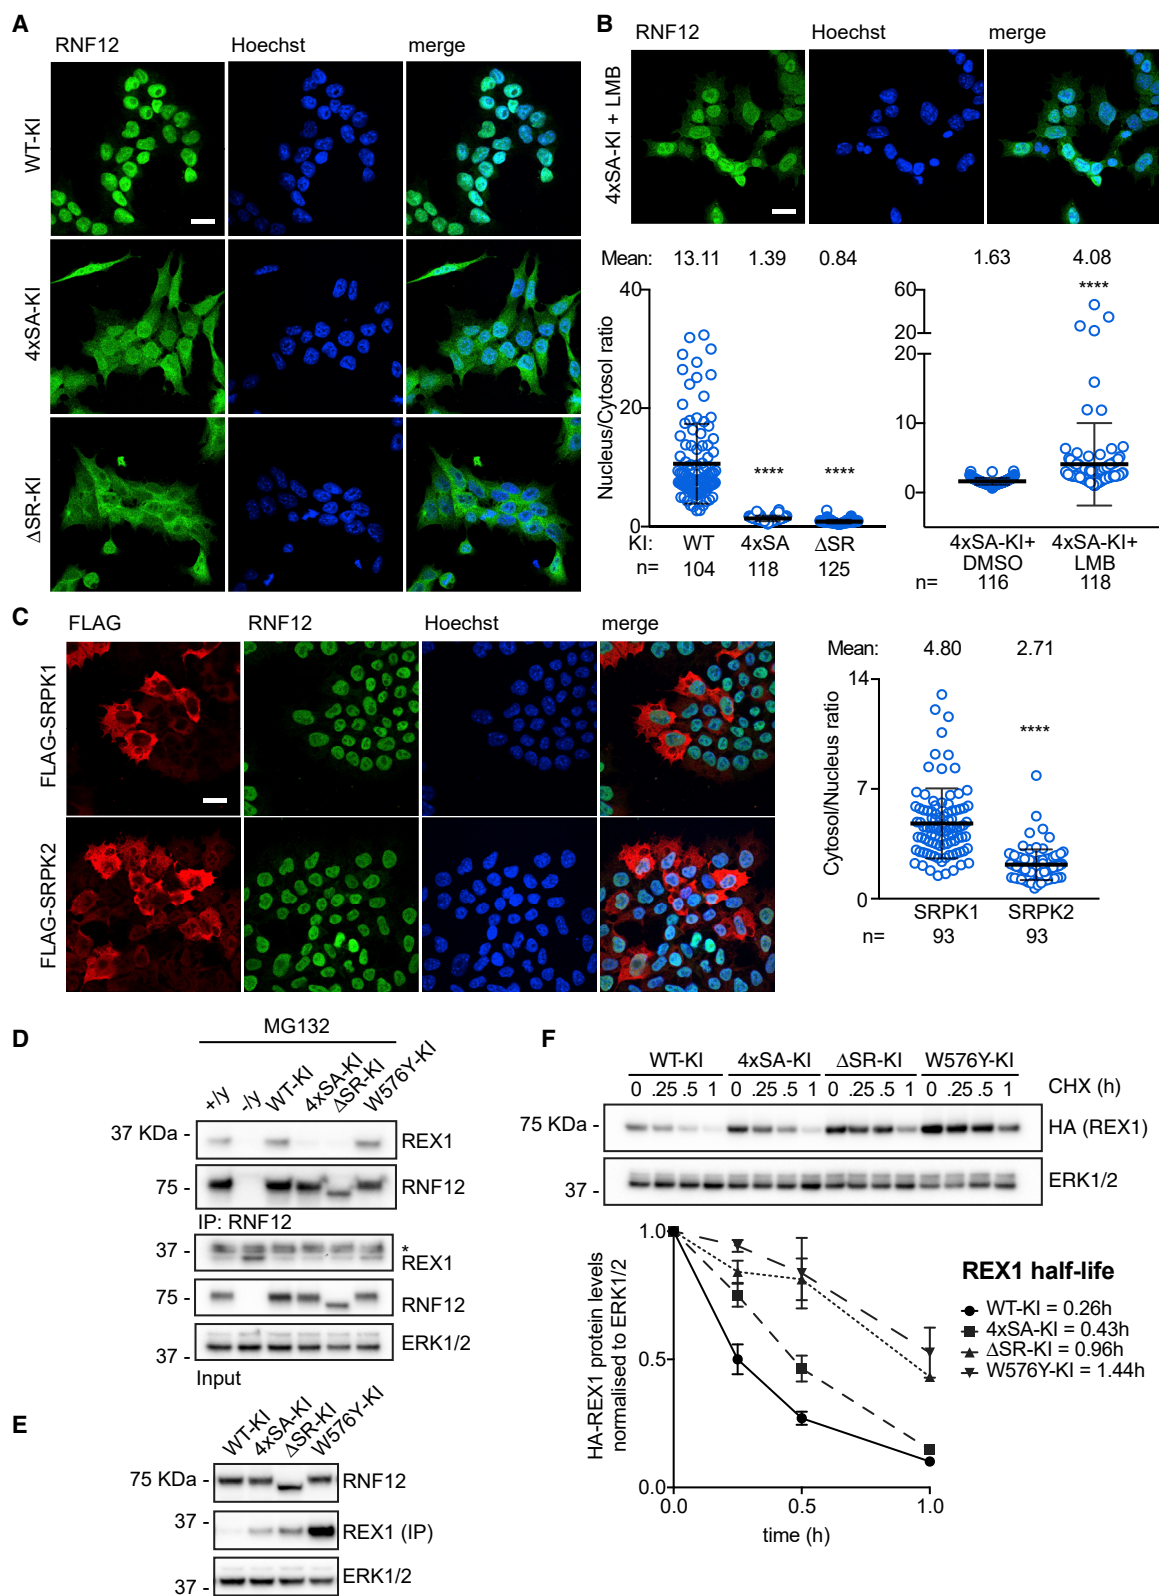

(legend on next page)



demonstrate that SRPK phosphorylation of RNF12 promotes REX1 targeting and degradation, and potentially that of other nuclear substrates.

### RNF12 SR-Motif Phosphorylation by SRPK Stimulates E3 Ubiquitin Ligase Activity

As RNF12 SR-motif phosphorylation impacts substrate degradation, we investigated whether SRPK-mediated SR-motif phosphorylation also regulates RNF12 catalytic activity. We used SRPK to phosphorylate the RNF12 SR-motifs to high stoichiometry *in vitro* (Figures S4A and S4B) and compared the E3 ubiquitin ligase activity of phosphorylated and non-phosphorylated RNF12. Strikingly, REX1 ubiquitylation detected by fluorescently labeled ubiquitin was enhanced following RNF12 phosphorylation by SRPK2 (Figures 4A and 4B), which is not observed upon pre-incubation with SRPKIN-1 (Figure 4A), or with catalytically inactive SRPK2 (Figure 4B). We also used a REX1 antibody to directly visualize mono-ubiquitylated REX1 (Figure S4C). Similar results were obtained with SRPK1 (Figures S4D and S4E) and ubiquitylation of SMAD7 (Figure 4C), another reported RNF12 substrate (Zhang et al., 2012). Taken together, these results suggest that SRPK phosphorylation stimulates RNF12 substrate ubiquitylation. However, the impact on RNF12 substrate poly-ubiquitylation has not yet been directly demonstrated.

We then sought to determine the mechanism by which RNF12 SR-motif phosphorylation stimulates catalytic activity. The SR-motif resides proximal to a basic region implicated in RNF12 substrate ubiquitylation (Bustos et al., 2018), and as such could potentially regulate RNF12 engagement with E2 ubiquitin conjugating enzyme or substrate. First, we investigated the impact of SR-motif phosphorylation on RNF12-dependent discharge of ubiquitin from a loaded E2 conjugating enzyme onto free lysine. At a concentration where unphosphorylated RNF12 poorly discharges ubiquitin from UBE2D1 E2 (Figure S4F), phosphorylation by SRPK2 augments E2 discharge activity (Figure 4D). Therefore, RNF12 SR-motif phosphorylation enhances substrate-independent ubiquitin discharge from E2 ubiquitin conjugating enzyme.

We also explored the direct impact of RNF12 SR-motif phosphorylation on substrate interaction. *In vivo*, RNF12 SR-motif phosphorylation promotes ubiquitylation activity and delivery to nuclear substrates, such as REX1 (Figure 3). In contrast, the

interaction between RNF12 and REX1 *in vitro* is destabilized by RNF12 SR-motif phosphorylation by SRPK1 (Figure 4E) or SRPK2 (Figure S4G), confirming that phosphorylation does not stimulate catalytic activity via increased substrate affinity. Taken together, our data indicate that RNF12 SR-motif phosphorylation by SRPK promotes delivery to nuclear substrates and stimulates intrinsic E3 ubiquitin ligase activity.

### RNF12 E3 Ubiquitin Ligase Activity Controls a Neurodevelopmental Gene Expression Program

As SRPK-dependent phosphorylation of the SR-motif activates RNF12 and anchors it in the nucleus to promote degradation of transcription factor substrates, such as REX1, we sought to identify the gene expression program that is regulated by this emergent signaling pathway. To this end, we employed RNF12-deficient (*Rlim*<sup>-/-</sup>) mESCs (Bustos et al., 2018) reconstituted with either wild-type RNF12 or an E3 ubiquitin ligase catalytic mutant (W576Y) and performed RNA sequencing (RNA-seq) to identify genes that are specifically regulated by RNF12. As validation of this experimental system, we show that REX1 degradation is restored by wild-type RNF12, but not RNF12 W576Y (Figure 5A). RNA-seq analysis reveals that RNF12 E3 ubiquitin ligase activity modulates expression of a significant cohort of RNAs (Figure 5B; 3,699 RNAs significantly altered, 19,721 RNAs not significantly altered). As proof of principle, the *Xist* long non-coding RNA, which has a key function in X-chromosome inactivation (Barakat et al., 2011), is regulated by RNF12 E3 ubiquitin ligase activity in the expected fashion (Figure 5B). Interestingly, additional comparison to control RNF12-deficient mESCs (Figure S5A) confirms that 1,032 RNAs are specifically suppressed by RNF12 in a manner dependent upon catalytic activity (Figure 5C).

In order to pinpoint functional groups of genes that are regulated by RNF12 E3 ubiquitin ligase activity, we employed Gene Ontology (GO) term analysis. Enriched within the cohort of RNF12-suppressed RNAs are those with GO terms associated with neuronal (Figure 5D; Table S5) and neural (Figure S5B; Table S6) development, differentiation, and function. This is consistent with a role for RNF12 in restricting mESC differentiation to neurons (Bustos et al., 2018). Genes assigned to neuron and/or neural GO terms are highlighted on a further plot of RNAs that are specifically regulated by RNF12 re-expression (Figure S5C). Interestingly, RNF12 suppresses expression of genes assigned

### Figure 3. SRPK Phosphorylation of RNF12 Regulates Nuclear Anchoring and E3 Ubiquitin Ligase Activity

(A) RNF12 localization in wild-type knockin (WT-KI), SR-motif phosphorylation site knockin (4xSA-KI), or SR-motif deletion ( $\Delta$ SR-KI) mESCs was determined by immunofluorescence. Scalebar: 20  $\mu$ m (Left). Quantification of the Nucleus/cytosol fluorescence intensity ratio (Right). Data represented as mean  $\pm$  SEM. One-way ANOVA followed by Tukey's multiple comparisons test; confidence level 95%. (\*\*\*\*)  $p < 0.0001$ .

(B) RNF12 4xSA-KI mESCs were treated with 30 nM leptomycin B for 6 h and RNF12 localization analyzed by immunofluorescence. Scale bar: 20  $\mu$ m (Top). Quantification of the nucleus/cytosol fluorescence intensity ratio (Bottom). Data represented as mean  $\pm$  SEM Unpaired Student's t test, two-sided, confidence level 95%. (\*\*\*\*)  $p < 0.0001$ .

(C) FLAG-tagged SRPK1 and SRPK2 were expressed in mESCs and localization of SRPKs and RNF12 analyzed by immunofluorescence. Scale bar: 20  $\mu$ m (Left). Quantification of the cytosol/nucleus fluorescence intensity ratio (Right). Data represented as mean  $\pm$  SEM Unpaired Student's t test, two-sided, confidence level 95%. (\*\*\*\*)  $p < 0.0001$ .

(D) WT, *Rlim*<sup>-/-</sup>, RNF12 WT-KI, 4xSA-KI,  $\Delta$ SR-KI, and W576Y-KI mESCs were treated with 10  $\mu$ M MG132 for 6 h and RNF12-REX1 co-immunoprecipitation analyzed. RNF12, REX1 and ERK1/2 were detected by immunoblotting. (\*) indicates non-specific signal.

(E) REX1 levels were analyzed in RNF12 WT-KI, 4xSA-KI,  $\Delta$ SR-KI, and W576Y-KI mESCs by immunoprecipitation followed by immunoblotting. ERK1/2 levels were detected by immunoblotting.

(F) REX1 half-life was determined in RNF12 WT-KI, 4xSA-KI,  $\Delta$ SR-KI, and W576Y-KI mESCs by immunoblotting. (Top) quantification of HA-REX1 protein levels normalized to ERK1/2 and calculated protein half-life (Bottom). Data represented as mean  $\pm$  SEM (n = 3). Related to Figure S3.

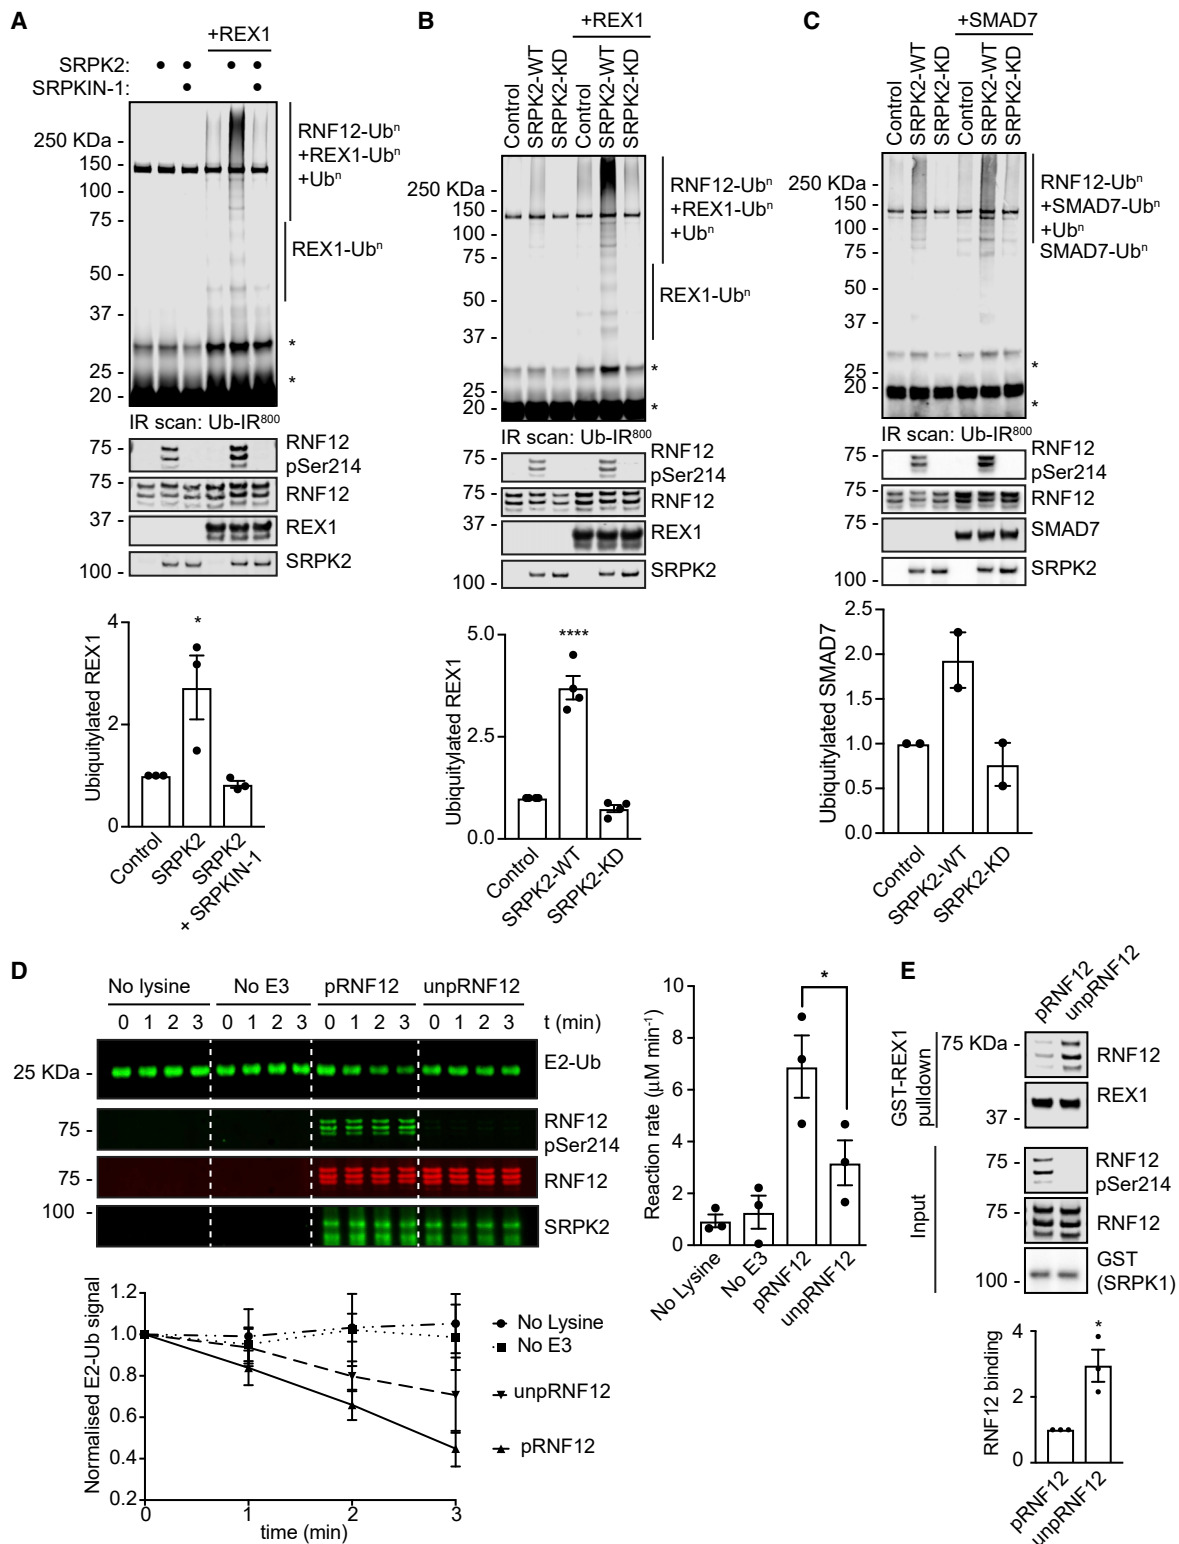

**Figure 4. SRPK Phosphorylation Directly Stimulates RNF12 E3 Ubiquitin Ligase Activity**

(A) Recombinant RNF12 was incubated with SRPK2 ± 10 μM SRPKIN-1 and REX1 ubiquitylation assessed. Infrared scans of ubiquitylated substrate signal (Top) and quantification (Bottom). Data represented as mean ± SEM (n = 3). One-way ANOVA followed by Tukey's multiple comparisons test; confidence level 95%. (\*) p = 0.0350. Phospho-Ser214 and total RNF12, REX1, and SRPK2 infrared immunoblots are shown. \* = non-specific fluorescent signal.

(legend continued on next page)

to the “neural crest cell differentiation” GO term (GO: 0014033), which are linked to craniofacial abnormalities associated with neurodevelopmental syndromes (Table S7). In summary, we uncovered a neural and/or neuronal gene expression program that is suppressed by RNF12, providing a molecular framework for RNF12-dependent regulation of neurodevelopmental processes (Bustos et al., 2018).

### SRPK Signaling to RNF12 Regulates Neurodevelopmental Genes

These results prompted us to investigate the function of SRPK-RNF12 signaling in regulating expression of RNF12-responsive genes that have key functions in neural development. These are Delta-like 1 (*Dll1*), a regulator of Notch signaling in neural stem cells (Grandbarbe et al., 2003), Netrin-1 (*Ntn1*) and *Unc5a*, an axon guidance system essential for coordination of neuronal connections (Ackerman et al., 1997; Leonardo et al., 1997; Serafini et al., 1996), *Kif1a*, a motor protein for axonal transport (Okada and Hirokawa, 1999) and *Gfap*, an marker of astrocytes and radial glial cells (Middeldorp and Hol, 2011). Expression of each of these mRNAs, with the exception of *Unc5a*, increases during *in vitro* neural differentiation (Figure S5D), when the RNF12 SR-motif is phosphorylated (Figure S5E). Consistent with our RNA-seq data (Figure 5B), *Dll1*, *Ntn1*, *Unc5a*, and *Gfap* are expressed at low levels in control RNF12 WT-KI mESCs, and this was augmented in catalytically inactive RNF12 W576Y-KI mESCs (Figure 5E). *Kif1a* is expressed as at least 7 different splice isoforms in mouse, which likely explains conflicting results between RNA-seq and quantitative RT-PCR analysis. Nevertheless, our data confirm that RNF12-regulated neural genes are controlled by endogenous RNF12 E3 ubiquitin ligase activity in mESCs.

We next employed RNF12 KI mESC lines to determine the importance of SRPK signaling to RNF12 in regulation of neural gene expression. Compared with RNF12 WT-KI mESCs, neural gene expression is generally augmented by mutation of the SR-motif phosphorylation sites (RNF12 4xSA KI), deletion of the entire motif (RNF12  $\Delta$ SR-KI), or disruption of E3 ubiquitin ligase activity (RNF12 W576Y-KI; Figure 5E). Therefore, SRPK phosphorylation of RNF12 regulates key neural genes, implicating the SRPK-RNF12 pathway in the control of neurodevelopmental processes. As further evidence of the importance of the SR-motif for RNF12-dependent transcriptional regulation, induction of the known RNF12 target gene *Xist* was similarly disrupted by SR-motif mutation or deletion (Figure S5F).

### The SRPK-RNF12 Pathway Regulates Gene Expression by Promoting REX1 Degradation

As RNF12 SR-motif phosphorylation is required for efficient substrate ubiquitylation and target gene regulation, we sought to further define the molecular pathway. The REX1 transcription factor substrate plays a critical role in RNF12-dependent regulation of *Xist* gene expression and X-chromosome activation (Gontan et al., 2012, 2018). Thus, we hypothesized that REX1 ubiquitylation and degradation is the mechanism by which RNF12 modulates neural gene expression. We generated RNF12/REX1 double knockout mESCs (*Rlim*<sup>-/-</sup>:*Zfp42*<sup>-/-</sup>; Figure 5F) to investigate whether REX1 disruption reverses the gene expression changes observed in RNF12-deficient mESCs (*Rlim*<sup>-/-</sup>). Neural gene expression was augmented in RNF12-deficient mESCs, while additional knockout of REX1 (*Rlim*<sup>-/-</sup>:*Zfp42*<sup>-/-</sup>) reverses this gene expression profile (Figure 5F). These data illuminate REX1 as a key substrate that controls neurodevelopmental gene expression downstream of SRPK-RNF12 signaling.

### Human Intellectual Disability Mutations in the SRPK-RNF12 Pathway Lead to a Deregulated Neurodevelopmental Gene Expression Program

Heritable variants in RNF12 cause a neurodevelopmental disorder termed as TOKAS, which is a syndromic form of X-linked intellectual disability (Frints et al., 2019; Hu et al., 2016; Tønne et al., 2015). We showed previously that TOKAS mutations specifically impair RNF12 E3 ubiquitin ligase activity leading to deregulated neuronal differentiation (Bustos et al., 2018). In order to determine whether aberrant SRPK-RNF12 dependent neurodevelopmental gene expression might be relevant for TOKAS etiology, we examined expression of neural genes in mESCs harboring an RNF12 TOKAS patient mutation (mouse R575C—equivalent to human R599C) (Bustos et al., 2018). Expressions of *Dll1* and *Kif1a* were significantly increased in TOKAS mutant mESCs, with *Ntn1*, *Unc5a*, and *Gfap* also showing a tendency toward increased expression (Figure 6A). Thus, RNF12 TOKAS mutation partially phenocopies RNF12 SR-motif mutation with respect to the regulation of neurodevelopmental genes (Figure 5E).

As the SRPK-RNF12 signaling axis is disrupted in intellectual disability, we hypothesized that SRPK variants might cause related developmental syndromes. We mined molecular genetic databases of gene variants found in developmental disorders (Deciphering Developmental Disorders Study, 2015, 2017; Hu et al., 2016; Niranjana et al., 2015). A number of SRPK mutations have been identified in patients with intellectual disabilities or

(B) Recombinant RNF12 was incubated with WT or kinase dead (KD) SRPK2 and subjected to REX1 fluorescent ubiquitylation assays. Infrared scans of ubiquitylated substrate signal (Top) and quantification (Bottom). Data represented as mean  $\pm$  SEM (n = 3). One-way ANOVA followed by Tukey’s multiple comparisons test; confidence level 95%. (\*\*\*\*) p < 0.0001. Phospho-Ser214 and total RNF12, REX1, and SRPK2 infrared immunoblots are shown. \* = non-specific fluorescent signal.

(C) Recombinant RNF12 was incubated with WT or KD SRPK2 and SMAD7 ubiquitylation assessed. Infrared scans of ubiquitylated substrate signal (Top) and quantification (Bottom). Data represented as mean  $\pm$  SD (n = 2). Phospho-Ser214 and total RNF12, REX1, and SRPK2 infrared immunoblots are shown. \* = non-specific fluorescent signal.

(D) Recombinant RNF12 was incubated with WT (pRNF12) or KD (unpRNF12) SRPK2 and subjected to E2 ubiquitin discharge assay. Infrared immunoblot scans (Top Left), reaction rate determinations (Top Right) and normalized quantification of E2-ubiquitin conjugate signal (Bottom) are shown. Data represented as mean  $\pm$  SEM (n = 3). One-way ANOVA followed by Tukey’s multiple comparisons test; confidence level 95%. (\*) p = 0.0490.

(E) Recombinant RNF12 was incubated with WT or KD SRPK1 and subjected to GST-REX1 pull-down assay. RNF12, REX1, phospho-Ser214 RNF12 and SRPK1 infrared immunoblots (Top) and RNF12-REX1 binding quantification (bottom) are shown. Data represented as mean  $\pm$  SEM (n = 3). Unpaired Student’s t test, two-sided, confidence level 95%. (\*) p = 0.0162. Related to Figure S4.

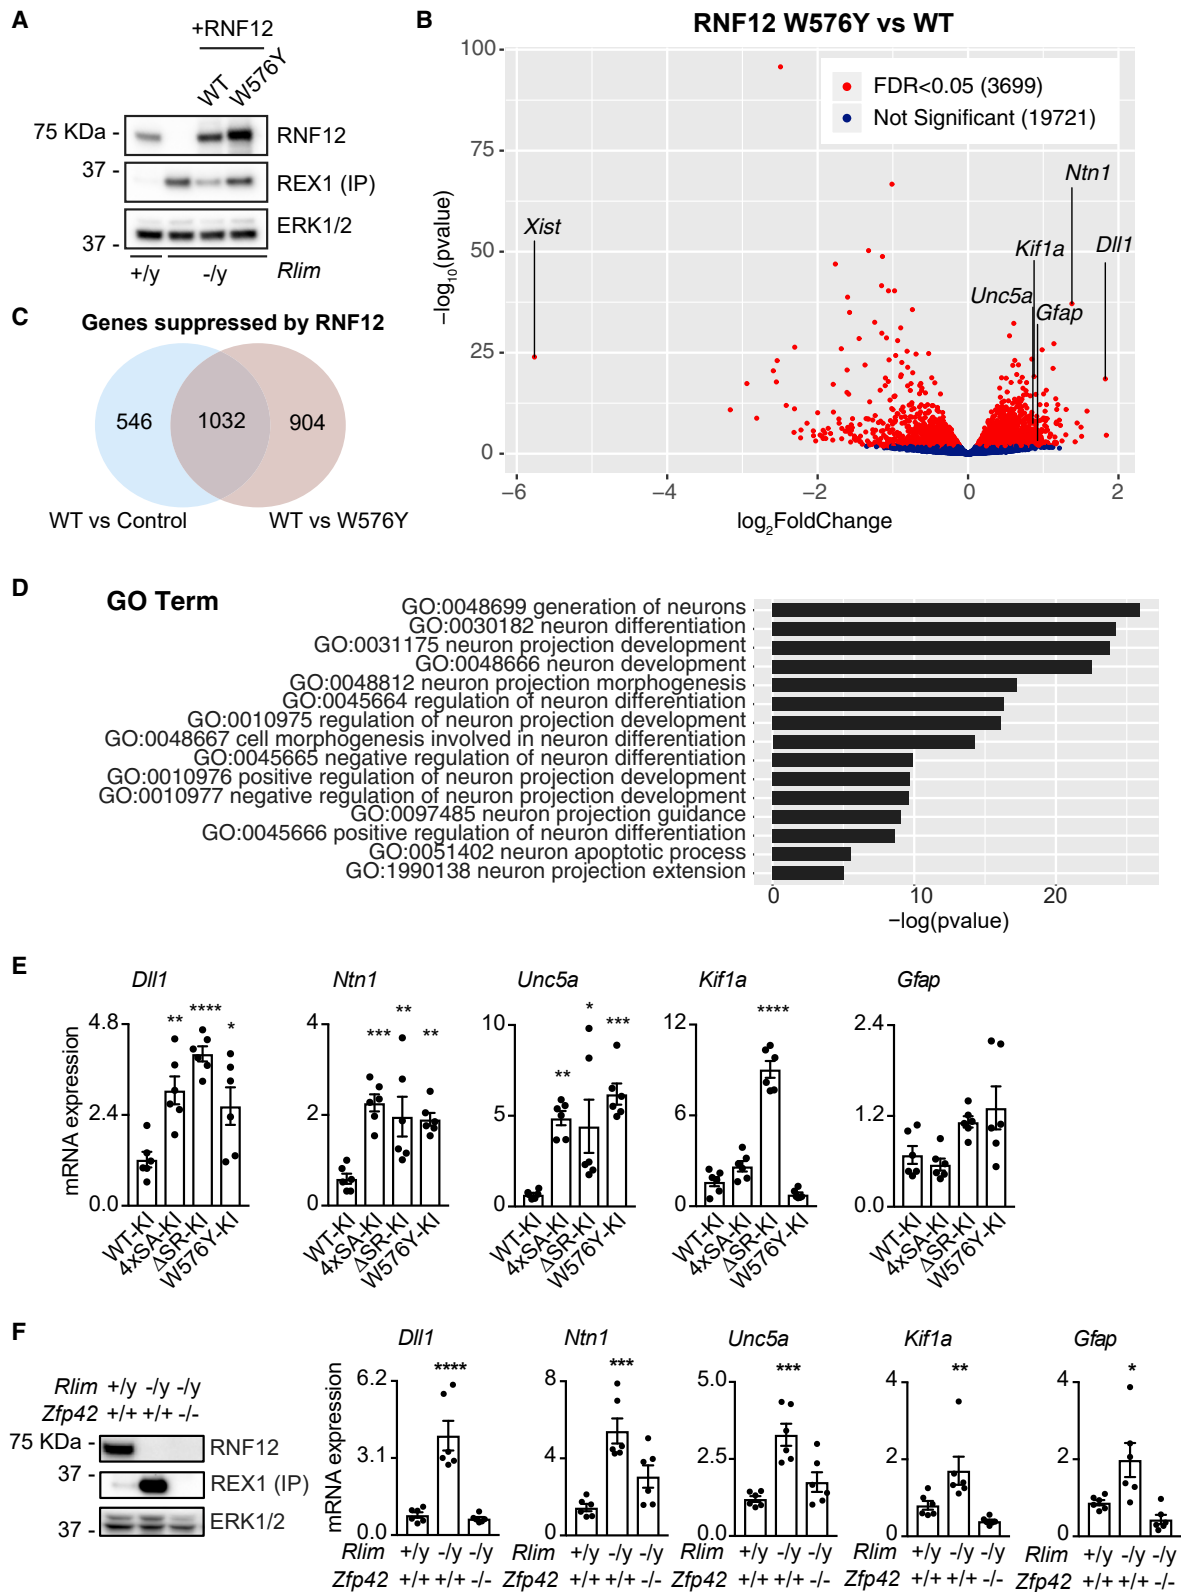

**Figure 5. RNF12-REX1 Signaling Controls a Neurodevelopmental Gene Expression Program**

(A) *Rlim*<sup>-/y</sup> mESCs were transfected with WT or catalytically inactive (W576Y) RNF12. REX1 levels were analyzed by immunoprecipitation and immunoblotting, RNF12 and ERK1/2 levels were determined by immunoblotting.

(legend continued on next page)

similar developmental abnormalities (Figure 6B, top). Of those, *SRPK2* is mainly deleted, suggesting that loss of *SRPK2* expression may be a feature of these disorders. A number of duplications of the X-linked *SRPK3* gene were identified (Figure 6B), which is likely explained by frequent X-chromosome duplications in developmental disorders. Interestingly, several point mutations within the *SRPK3* kinase domain (Figure 6B, bottom) have been reported in X-linked intellectual disability (Hu et al., 2016). We tested the effect of these mutations on the ability of *SRPK3* to phosphorylate RNF12. *SRPK3*, H159D, and T211M mutations strongly impaired *SRPK3* phosphorylation of RNF12, while K270M disrupted RNF12 phosphorylation to a lesser extent (Figure 6C). Thus, variants found in intellectual disability patients impair the ability of *SRPK* to phosphorylate RNF12, suggesting that *SRPK* function may be disrupted in intellectual disability disorders.

These findings prompted us to investigate the expression and function of *SRPK* family members in human pluripotent stem cells and the brain. *SRPK1*, *SRPK2*, and RNF12 are expressed in human induced pluripotent stem cells (hiPSCs; Figure 6D), and quantitative total proteomic analysis confirmed the expression of these components and REX1 (Figure 6E). Furthermore, the pathway is active in human pluripotent cells, as treatment of hiPSCs with the *SRPK* inhibitor SRPKIN-1 promotes RNF12 SR-motif dephosphorylation (Figure 6F). Mining single nuclei RNA-seq sequencing data (Hodge et al., 2019) revealed that *SRPK1* and *SRPK2* are broadly expressed in human cortical neurons, while *SRPK3* is specifically expressed in two GABAergic inhibitory neuron populations (Figure 6G), which have been implicated in intellectual disability (Sgadò et al., 2011; Smith-Hicks, 2013). RNF12, *SRPK1*, and *SRPK2* are also robustly expressed in the adult mouse brain (Figure 6H). Therefore, the *SRPK*-RNF12 pathway is expressed and active in human pluripotent stem cells, and the components are expressed in adult human cortical neurons and mouse brain. Taken together, our data suggest that *SRPK*-RNF12 signaling is conserved during mouse and human neuronal development.

### SRPK Phosphorylates the RNF12 SR-Motif in Neurons

Finally, we investigated the function of the *SRPK*-RNF12 pathway in neurons. Consistent with gene expression data from human cortical neurons (Figure 6G) and adult mouse brain (Figure 6H), RNF12, *SRPK1*, and *SRPK2* were robustly expressed during maturation of isolated mouse fetal cortical neural progenitors *in vitro* (Figures 7A and S6). In contrast, *SRPK3* (Figure S6) and REX1 (Figure 7B) were not detected in cultured

mouse cortical neurons. RNF12 was predominantly localized to the nucleus in these neurons (Figure 7C), and phos-tag analysis indicated that the RNF12 SR-motif was heavily phosphorylated throughout a time course of neuronal maturation (Figure 7D). Furthermore, treatment of mature mouse cortical neurons with the selective *SRPK* inhibitor SRPKIN-1 suppressed RNF12 phosphorylation, as measured by phos-tag (Figure 7E). These data confirm that *SRPKs* phosphorylate the RNF12 SR-motif during neuronal maturation *in vitro*, suggesting that *SRPK* activity regulates RNF12 function in the nervous system.

### DISCUSSION

Functional diversification of protein kinases is a key evolutionary tool, employing pre-existing signaling cassettes for regulation of complex cellular processes. However, the importance of functional diversification in the regulation of multi-cellularity remains unclear. Here, we show that SRSF protein kinase (*SRPK*), a highly conserved kinase family implicated in mRNA splicing, has undergone functional diversification to control developmental ubiquitin signaling. In mammalian embryonic stem cells, we found that *SRPK* activity is not required for splicing regulation. Instead, *SRPK* phosphorylates the E3 ubiquitin ligase RNF12/RLIM to control neurodevelopmental gene expression (Figure 7F). This function may have initially evolved to enable coordinated control of core cellular processes, such as RNA splicing, with key developmental events in multicellular organisms.

Our studies reveal that RNF12 SR-motif phosphorylation by *SRPK* drives delivery to nuclear substrates and increases substrate-independent ubiquitin discharge by a cognate E2-conjugating enzyme, indicating that phosphorylation of these motifs is required for maximal catalytic activity. Although RNF12 SR-motifs are distal to the catalytic RING domain, previous work confirms that distal non-RING regulatory elements play important roles in RNF12 catalysis (Bustos et al., 2018; Frints et al., 2019). Indeed, phosphorylation of distal non-RING elements in another RING E3 c-CBL mediates enzymatic activation (Dou et al., 2013). Structural investigations of full-length RNF12 in complex with cognate E2, ubiquitin, and substrate will be required to determine how phosphorylation drives enzymatic activation at the atomic level.

Our findings propose a critical role for *SRPK* in regulating developmental processes, although functional redundancy within the mammalian *SRPK* family has precluded genetic interrogation of *SRPK* functions during development. Nevertheless, a functional genomic screening indicated that *SRPK2* is required

(B) Volcano plot of RNA-seq analysis comparing *Rlim*<sup>-/-</sup> mESCs transfected with WT or W576Y RNF12. RNAs that are significantly altered by RNF12 E3 ubiquitin ligase activity are displayed in red. Selected neurodevelopmental mRNAs are labeled (*Dll1*, *Ntn1*, *Unc5a*, *Kif1a*, *Gfap*). *Xist* is a positive control for RNF12 E3 ubiquitin ligase activity. FDR, false discovery rate.

(C) Venn diagram displaying total number of RNAs negatively regulated by RNF12 catalytic activity. Intersection (1,032 genes) represents RNAs whose expression is significantly altered when comparing control versus WT RNF12, and WT RNF12 versus W576Y catalytic mutant.

(D) GO category enrichment analysis of genes/RNAs related to the GO term "neuron" whose expression is inhibited by RNF12 (232 genes).

(E) RNF12 WT-KI, 4xSA-KI, ΔSR-KI, and W576Y-KI mESCs were subjected to quantitative RT-PCR analysis of relative mRNA expression. Data represented as mean ± SEM (n = 3). One-way ANOVA followed by Tukey's multiple comparisons test; confidence level 95%. *Dll1* (\*\*\*) p = 0.0058, (\*\*\*\*) p < 0.0001, (\*) p = 0.0377; *Ntn1* (\*\*\*\*) p = 0.0008, (\*\*) p = 0.0057, (\*\*\*) p = 0.0082; *Unc5a* (\*\*) p = 0.0079, (\*) p = 0.0188, (\*\*\*\*) p = 0.0006. *Kif1a* (\*\*\*\*) p < 0.0001.

(F) RNF12, REX1, and ERK1/2 protein levels in WT, *Rlim*<sup>-/-</sup> and *Rlim*<sup>-/-</sup>:Zfp42<sup>-/-</sup> mESCs were determined by immunoblotting (RNF12 and ERK1/2) and immunoprecipitation followed by immunoblotting (REX1) (Left). WT, *Rlim*<sup>-/-</sup> and *Rlim*<sup>-/-</sup>:Zfp42<sup>-/-</sup> mESCs were analyzed for relative mRNA expression by quantitative RT-PCR (Right). Data represented as mean ± SEM (n = 3). One-way ANOVA followed by Tukey's multiple comparisons test; confidence level 95%. *Dll1* (\*\*\*\*) p < 0.0001; *Ntn1* (\*\*\*\*) p = 0.0002; *Unc5a* (\*\*\*\*) p = 0.0003; *Kif1a* (\*) p = 0.0316; *Gfap* (\*) p = 0.0261, Related to Figure S5; Tables S5–S7.

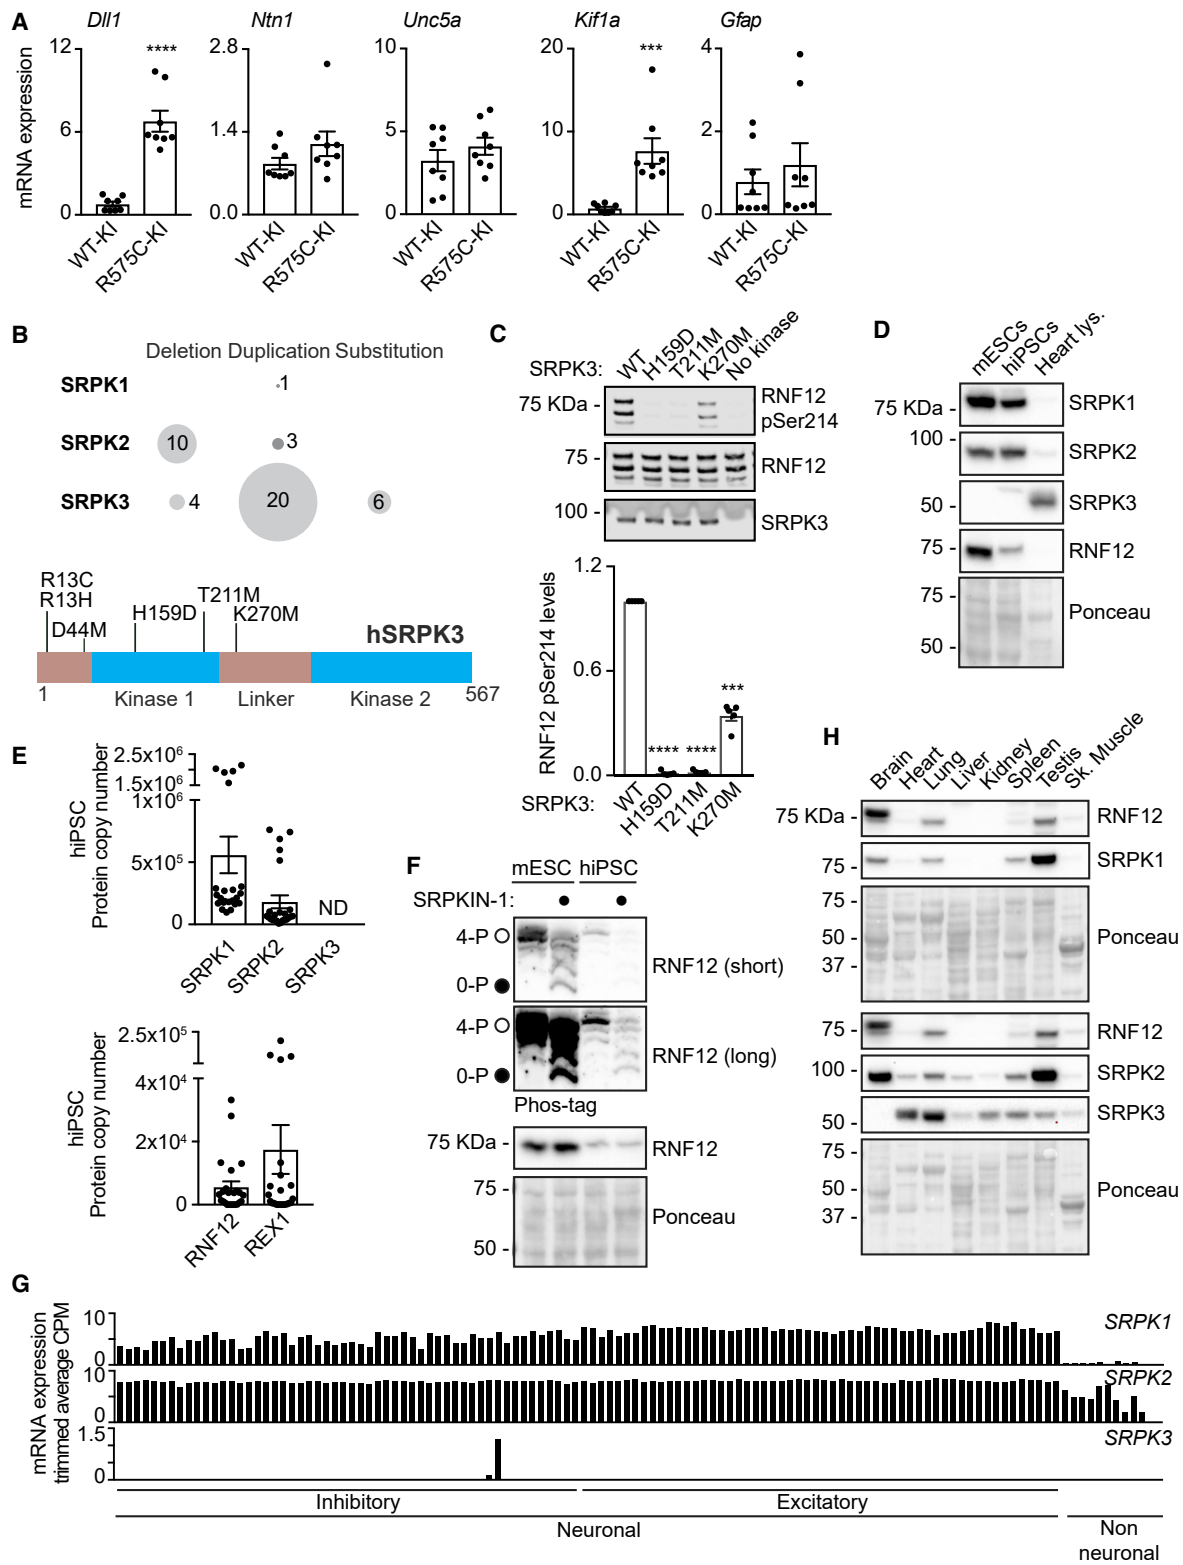

**Figure 6. The SRPK-RNF12 Signaling Pathway Is Deregulated in Human Intellectual Disability**

(A) RNF12 WT-KI or R575C-KI mESCs were analyzed for relative mRNA expression by quantitative RT-PCR. Data represented as mean  $\pm$  SEM (n = 3). Unpaired Student's t test, two-sided, confidence level 95%. *Dll1* (\*\*\*\*) p < 0.0001; *Kif1a* (\*\*\*) p = 0.0005.

(legend continued on next page)

for efficient X-chromosome inactivation (Chan et al., 2011), which is a key developmental function of RNF12. Furthermore, a recent study showed that SRPK1 initiates zygotic genome activation by phosphorylating protamine (Gou et al., 2020). Therefore, emerging evidence provides support for the notion that SRPKs perform key developmental functions.

SRPK signaling to RNF12 may ensure correct regulation of neural development. SRPK2 is highly expressed in the brain (Wang et al., 1998) and regulates processes relevant to neurodegeneration (Hong et al., 2012; Wang et al., 2017), suggesting a role for SRPK in development and maintenance of the nervous system. Additionally, we demonstrate that SRPK3 is expressed in sub-sets of human GABAergic neurons. Therefore, we propose that SRPK2 deletion or SRPK3 mutation may disrupt RNF12 function during development or maintenance of specific neuronal populations, leading to intellectual disability. A systematic analysis of SRPK and RNF12 expression during nervous system development is now required to identify specific cell populations in which SRPK-RNF12 signaling is relevant and potentially disrupted in intellectual disability.

Regulation of SRPK in a developmental context also remains unexplored. Previous work suggests that SRPKs are constitutively activated (Ngo et al., 2007), with additional regulatory inputs from the AKT-mTOR pathway (Jang et al., 2009; Lee et al., 2017). Diverse temporal and tissue-specific SRPK expression patterns also suggest that transcriptional regulation may be a key mechanism to ensure that SRPK phosphorylates substrates, such as RNF12, within the correct developmental time and space.

Finally, a key question relates to the function of RNF12 substrates in neuronal development. Our data indicate that RNF12 controls neural gene expression by ubiquitylating the REX1 transcription factor. The SRPK-RNF12 axis therefore appears to act as a safeguard to prevent aberrant REX1 accumulation and expression of neuronal genes in pluripotent stem cells. Although REX1 has not previously been implicated in the regulation of neuronal development and is undetectable in neurons, pathological REX1 accumulation upon RNF12 pathway mutation may unleash neomorphic transcriptional functions that are detrimental to neuronal development. This system could influence neuronal development by (1) transcriptional suppression of neural genes in non-neural cells, (2) modulating the timing and levels of neural gene expression in the developing neuroepithelium, or (3) acting to regulate a specific gene at the top of the neurogenesis signaling cascade. These findings suggest that approaches to activate SRPKs or normalize expression of REX1, for example

using protein degradation technologies, such as proteolysis targeting chimeras (PROTACs), might provide therapeutic benefit in patients with neurodevelopmental disorders underpinned by deregulated SRPK-RNF12 signaling.

## STAR★METHODS

Detailed methods are provided in the online version of this paper and include the following:

- KEY RESOURCES TABLE
- RESOURCE AVAILABILITY
  - Lead Contact
  - Materials Availability
  - Data and Code Availability
- EXPERIMENTAL MODEL AND SUBJECT DETAILS
  - Cell Lines
  - Animal Studies
- METHOD DETAILS
  - Serine-Arginine Motif Search
  - Plasmid and siRNA Transfection
  - CRISPR/Cas9 Gene Editing
  - Pharmacological Inhibitors
  - Kinase Inhibitor Profiling
  - Immunoblotting and Phos-Tag Analysis
  - Mass Spectrometry
  - Protein Expression and Purification
  - *In Vitro* Kinase Assays
  - Immunofluorescence
  - *In Vitro* Phospho-RNF12 Activity Assays
  - Binding Assays
  - RNA-Sequencing and Gene Ontology Analysis
  - RNA Extraction and Quantitative RT-PCR
- QUANTIFICATION AND STATISTICAL ANALYSIS

## SUPPLEMENTAL INFORMATION

Supplemental Information can be found online at <https://doi.org/10.1016/j.devcel.2020.09.025>.

## ACKNOWLEDGMENTS

We thank Nathanael Gray and Tinghu Zhang (Dana-Farber Cancer Institute) for providing SRPKIN-1, Sam Aparicio (University of British Columbia) for CLK-IN-T3, Helen Walden and Viduth Chaugule (University of Glasgow) for fluorescent ubiquitin, and Francisca Cornejo (Universidad Mayor) for hiPSC extracts. We also thank the following colleagues from the University of Dundee: Angus Lamond and Andrea Pawellek for Madrasin, Ron Hay and Emma Branigan for

(B) Graphical representation of SRPK intellectual disability variants reported in literature grouped by type of chromosomal mutation (Top) and position within the SRPK3 protein (Bottom).

(C) RNF12 phosphorylation *in vitro* by WT SRPK3 or the indicated mutants was analyzed by immunoblotting for RNF12 phospho-Ser214 and total RNF12 (Top). Quantification of infrared RNF12 phospho-Ser214 immunoblotting blotting signal normalized to total RNF12 (Bottom). Data represented as mean  $\pm$  SEM (n = 3). One-way ANOVA followed by Tukey's multiple comparisons test; confidence level 95%. (\*\*\*\*)  $p > 0.0001$ , (\*\*\*)  $p = 0.0001$ .

(D) SRPK1, SRPK2, SRPK3, and RNF12 levels in mESCs, hiPSCs (CHiPS4 cell line), and mouse heart lysate were analyzed by immunoblotting.

(E) hiPSC (bubh\_3 line) extracts were analyzed for average protein copy number via quantitative proteomics. Data were obtained from the human induced pluripotent stem cell initiative database (<http://www.hipsci.org/>) and represented as mean  $\pm$  SEM (n = 24), ND, not detected.

(F) hiPSCs (CHiPS4 cell line) and mESCs were treated with 10  $\mu$ M SRPKIN-1 for 4 h and RNF12 SR-motif phosphorylation analyzed by phos-tag immunoblotting for RNF12. Fully phosphorylated (4-P) and unphosphorylated (0-P) RNF12 SR-motif is indicated with open (○) and closed (●) circles, respectively.

(G) Single nuclei isolated from post-mortem human brain cortex neurosurgery were analyzed via SMART-seq v4 RNA-seq (data from Hodge et al., 2019). Each bar represents a distinct neuronal sub-type or non-neuronal cell. Trimmed average counts per million (CPM) for SRPK1, SRPK2, and SRPK3 are shown.

(H) Expression of RNF12, SRPK1, SRPK2, and SRPK3 in adult mouse tissues was analyzed by immunoblotting. Ponceau S staining is shown as a loading control.

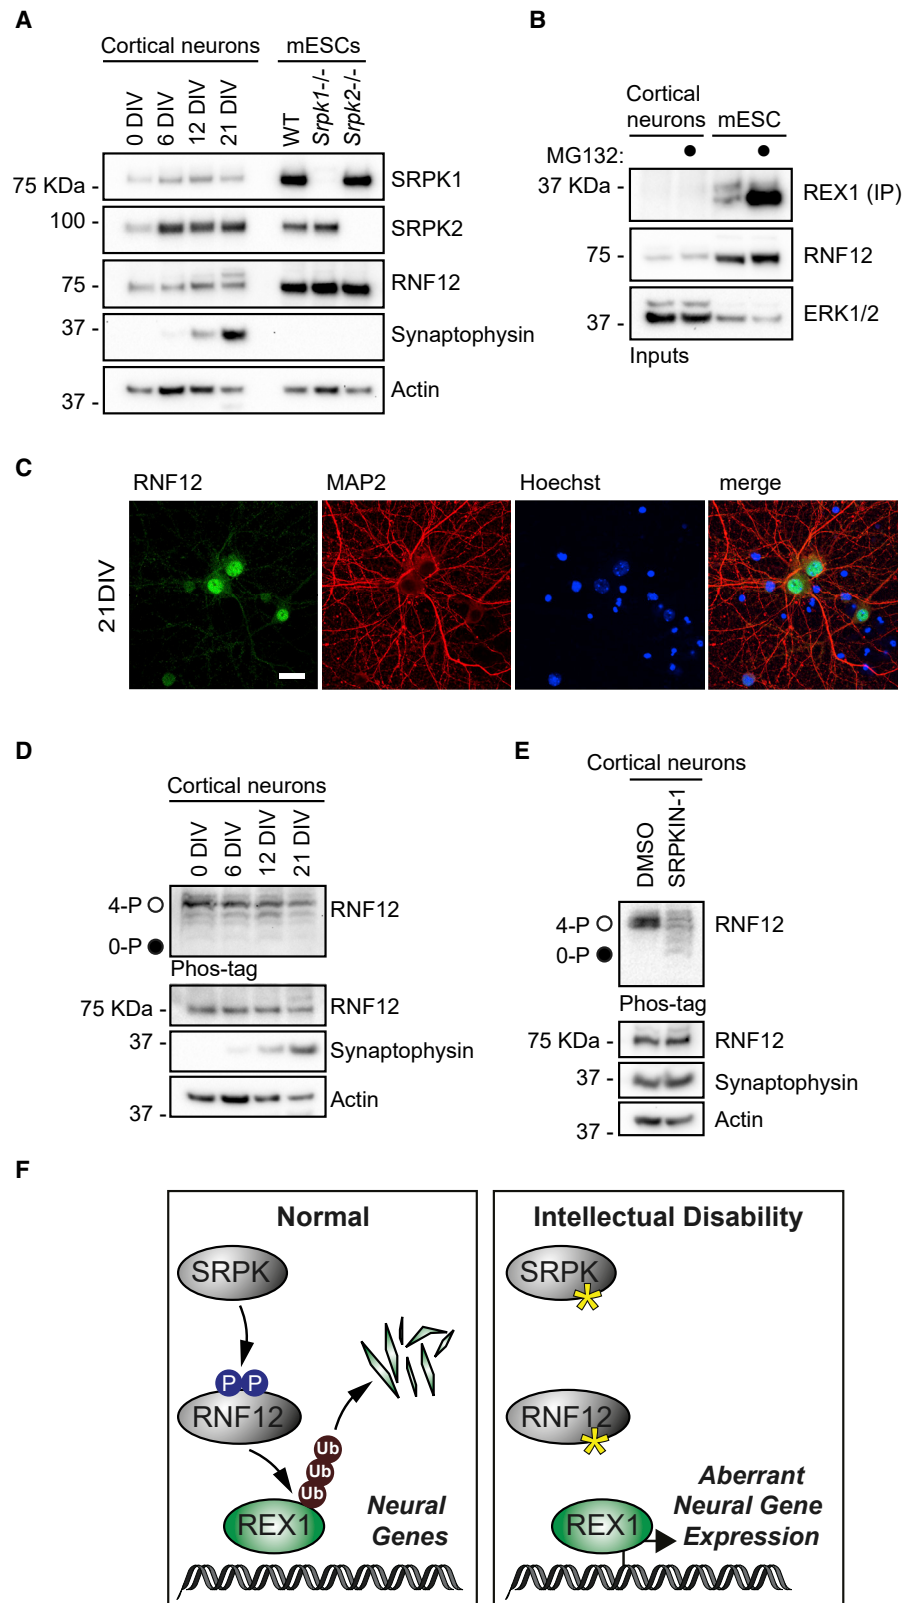

**Figure 7. The SRPK-RNF12 Signaling Pathway Operates in Neurons**

(A) Primary cortical neurons isolated from E16.5 C57BL/6 mice were cultured for the indicated number of days in vitro (DIV) and RNF12, SRPK1, and SRPK2, synaptophysin and actin levels analyzed via immunoblotting alongside the indicated mESC lines.

(legend continued on next page)



UBE2D1, Miratul Muqit for expertise in mouse neuronal culture, Vicky Cowling and Joana Silva for mouse tissue extracts, Alejandro Brenes for HipSci proteomics data, and Kate Storey for critical reading of the manuscript. G.M.F is supported by a Wellcome Trust/Royal Society Sir Henry Dale fellowship (211209/Z/18/Z) and a Medical Research Council NEW Investigator award (MR/N000609/1). A.S.-F. is supported by a MRC-PPU prize studentship. G.N. and M.M. are supported by research grants ANID/FONDAP/15090007 and FONDECYT/11190998.

#### AUTHOR CONTRIBUTIONS

F.B. and G.M.F. conceived the study and designed the experiments. F.B., A.S.-F., A.C., O.A., L.B., L.D., J.M., R.G., J.V., and G.M.F. performed experiments. G.N. and M.M. analyzed data and prepared figures. T.M. and R.T. performed DNA cloning and CRISPR-Cas9 design. C.J.H. generated reagents. R.S. analyzed mass-spectrometry data. F.B. and G.M.F. wrote the paper.

#### DECLARATION OF INTERESTS

The authors declare no competing interests.

Received: March 23, 2020

Revised: August 17, 2020

Accepted: September 25, 2020

Published: October 19, 2020

#### SUPPORTING CITATIONS

The following references appear in the Supplemental Information: Bao and Jin, 2006, Byrd and Meyers, 2005, Chen et al., 2012, Chen et al., 2014, Coles et al., 2006, Dixon et al., 1994, Duprez et al., 1999, Fukumoto et al., 2006, Gammill et al., 2006, Gopinathan et al., 2019, Hargrave et al., 1997, Hill et al., 2014, Huang et al., 2016, Humphreys et al., 2012, Jia et al., 2016, Kamalakar et al., 2019, Li et al., 2009, Li et al., 2018, Micaglio et al., 2019, Nikopoulos et al., 2007, Parada et al., 2015, Pilia et al., 1999, Roosenboom et al., 2018, Sela-Donnenfeld and Kalcheim, 1999, Shin et al., 2012, Sock et al., 2004, Teng et al., 2017, Toyofuku et al., 2008, Wang and Astrof, 2016, Wu and Taneyhill, 2012, Yen et al., 2010, York et al., 2018, Yu and Moens, 2005, Zhang et al., 2016, Zhu et al., 2019, Zuniga et al., 2010.

#### REFERENCES

Ackerman, S.L., Kozak, L.P., Przyborski, S.A., Rund, L.A., Boyer, B.B., and Knowles, B.B. (1997). The mouse rostral cerebellar malformation gene encodes an UNC-5-like protein. *Nature* 386, 838–842.

Anders, S., Pyl, P.T., and Huber, W. (2015). HTSeq—a python framework to work with high-throughput sequencing data. *Bioinformatics* 31, 166–169.

Bao, Z.Z., and Jin, Z. (2006). Sema3D and Sema7A have distinct expression patterns in chick embryonic development. *Dev. Dyn.* 235, 2282–2289.

Barakat, T.S., Gunhanlar, N., Pardo, C.G., Achame, E.M., Ghazvini, M., Boers, R., Kenter, A., Rentmeester, E., Grootegoed, J.A., and Gribnau, J. (2011). RNF12 activates Xist and is essential for X chromosome inactivation. *PLoS Genet.* 7, e1002001.

Batson, J., Toop, H.D., Redondo, C., Babaei-Jadidi, R., Chaikuad, A., Wearmouth, S.F., Gibbons, B., Allen, C., Tallant, C., Zhang, J., et al. (2017). Development of potent, selective SRPK1 inhibitors as potential topical therapeutics for neovascular eye disease. *ACS Chem. Biol.* 12, 825–832.

Brenes, A., and Lamond, A.I. (2019). The encyclopedia of proteome dynamics: the KinoViewer. *Bioinformatics* 35, 1441–1442.

Brenes, A.J., Yoshikawa, H., Bensaddek, D., Mirauta, B., Seaton, D.D., Hukelmann, J.L., Jiang, H., Stegle, O., and Lamond, A.I. (2020). Erosion of human X chromosome inactivation causes major remodelling of the iPSC proteome. [bioRxiv biorxiv.org/content/10.1101/2020.03.18.997049v2](https://doi.org/10.1101/2020.03.18.997049v2).

Bustos, F., Segarra-Fas, A., Chaugule, V.K., Brandenburg, L., Branigan, E., Toth, R., Macartney, T., Knebel, A., Hay, R.T., Walden, H., and Findlay, G.M. (2018). RNF12 X-linked intellectual disability mutations disrupt E3 ligase activity and neural differentiation. *Cell Rep.* 23, 1599–1611.

Byrd, N.A., and Meyers, E.N. (2005). Loss of Gbx2 results in neural crest cell patterning and pharyngeal arch artery defects in the mouse embryo. *Dev. Biol.* 284, 233–245.

Calarco, J.A., Superina, S., O'Hanlon, D., Gabut, M., Raj, B., Pan, Q., Skalska, U., Clarke, L., Gelinis, D., van der Kooy, D., et al. (2009). Regulation of vertebrate nervous system alternative splicing and development by an SR-related protein. *Cell* 138, 898–910.

Cao, W., Jamison, S.F., and Garcia-Blanco, M.A. (1997). Both phosphorylation and dephosphorylation of ASF/SF2 are required for pre-mRNA splicing in vitro. *RNA* 3, 1456–1467.

Chan, K.M., Zhang, H., Malureanu, L., van Deursen, J., and Zhang, Z. (2011). Diverse factors are involved in maintaining X chromosome inactivation. *Proc. Natl. Acad. Sci. USA* 108, 16699–16704.

Chen, Q., Wang, H., Hetmanski, J.B., Zhang, T., Ruczinski, I., Schwender, H., Liang, K.Y., Fallin, M.D., Redett, R.J., Raymond, G.V., et al. (2012). BMP4 was associated with NSCL/P in an Asian population. *PLoS One* 7, e35347.

Chen, Q., Wang, H., Schwender, H., Zhang, T., Hetmanski, J.B., Chou, Y.H., Ye, X., Yeow, V., Chong, S.S., Zhang, B., et al. (2014). Joint testing of genotypic and gene-environment interaction identified novel association for BMP4 with non-syndromic CL/P in an Asian population using data from an International Cleft Consortium. *PLoS One* 9, e109038.

Chen, R.E., and Thorner, J. (2007). Function and regulation in MAPK signaling pathways: lessons learned from the yeast *Saccharomyces cerevisiae*. *Biochim. Acta* 1773, 1311–1340.

Cohen, P. (2002). The origins of protein phosphorylation. *Nat. Cell Biol.* 4, E127–E130.

Coles, E.G., Gammill, L.S., Miner, J.H., and Bronner-Fraser, M. (2006). Abnormalities in neural crest cell migration in laminin alpha5 mutant mice. *Dev. Biol.* 289, 218–228.

Colwill, K., Pawson, T., Andrews, B., Prasad, J., Manley, J.L., Bell, J.C., and Duncan, P.I. (1996). The Clk/Sty protein kinase phosphorylates SR splicing factors and regulates their intranuclear distribution. *EMBO J.* 15, 265–275.

Cowley, S., Paterson, H., Kemp, P., and Marshall, C.J. (1994). Activation of MAP kinase kinase is necessary and sufficient for PC12 differentiation and for transformation of NIH 3T3 cells. *Cell* 77, 841–852.

(B) Cortical neurons were cultured for 21 days and treated with 10  $\mu$ M MG132 and protein levels analyzed by immunoprecipitation and immunoblotting (REX1) and immunoblotting (RNF12 and ERK1/2).

(C) Cortical neurons were cultured *in vitro* for the indicated number of days (DIV) and RNF12 and MAP2 neuron specific marker analyzed by immunofluorescence. Scale bar: 20  $\mu$ m.

(D) RNF12 SR-motif phosphorylation during *in vitro* mouse cortical neuron maturation was analyzed via phos-tag immunoblotting for RNF12. Fully phosphorylated (4-P) and unphosphorylated (0-P) RNF12 SR-motifs are indicated by open (○) and closed (●) circles, respectively. Synaptophysin and actin levels were determined by immunoblotting.

(E) Cortical neurons were cultured for 21 days and treated with 10  $\mu$ M SRPKIN-1 for 4 h RNF12 SR-motif phosphorylation was analyzed by phos-tag immunoblotting for RNF12. Fully phosphorylated (4-P) and unphosphorylated (0-P) RNF12 SR-motif is indicated with open (○) by closed (●) circles, respectively. Synaptophysin and actin levels were determined by immunoblotting.

(F) The SRPK-RNF12-REX1 signaling pathway regulates neural gene expression and is disrupted in intellectual disability disorders. SRPK phosphorylates the RNF12 SR-motif to promote REX1 ubiquitylation and proteasomal degradation, which acts as a “brake” for neural gene expression in self-renewing pluripotent stem cells. In intellectual disability, inactivating mutations in SRPKs or RNF12 lead to REX1 accumulation and aberrant induction of neural genes.

- Dagher, S.F., and Fu, X.D. (2001). Evidence for a role of Sky1p-mediated phosphorylation in 3' splice site recognition involving both Prp8 and Prp17/Slu4. *RNA* 7, 1284–1297.
- Deciphering Developmental Disorders Study. (2015). Large-scale discovery of novel genetic causes of developmental disorders. *Nature* 519, 223–228.
- Deciphering Developmental Disorders Study. (2017). Prevalence and architecture of de novo mutations in developmental disorders. *Nature* 542, 433–438.
- Ding, J.H., Zhong, X.Y., Hagopian, J.C., Cruz, M.M., Ghosh, G., Feramisco, J., Adams, J.A., and Fu, X.D. (2006). Regulated cellular partitioning of SR protein-specific kinases in mammalian cells. *Mol. Biol. Cell* 17, 876–885.
- Ding, L., Paszkowski-Rogacz, M., Nitzsche, A., Slabicki, M.M., Heninger, A.K., de Vries, I., Kittler, R., Junqueira, M., Shevchenko, A., Schulz, H., et al. (2009). A genome-scale RNAi screen for Oct4 modulators defines a role of the Paf1 complex for embryonic stem cell identity. *Cell Stem Cell* 4, 403–415.
- Dixon, J., Gladwin, A.J., Loftus, S.K., Riley, J.H., Perveen, R., Wasmuth, J.J., Anand, R., and Dixon, M.J. (1994). A YAC contig encompassing the Treacher Collins syndrome critical region at 5q31.3-32. *Am. J. Hum. Genet.* 55, 372–378.
- Dobin, A., Davis, C.A., Schlesinger, F., Drenkow, J., Zaleski, C., Jha, S., Batut, P., Chaisson, M., and Gingeras, T.R. (2013). STAR: ultrafast universal RNA-seq aligner. *Bioinformatics* 29, 15–21.
- Dou, H., Buetow, L., Sibbet, G.J., Cameron, K., and Huang, D.T. (2013). Essentiality of a non-RING element in priming donor ubiquitin for catalysis by a monomeric E3. *Nat. Struct. Mol. Biol.* 20, 982–986.
- Duprez, D., Leyns, L., Bonnin, M.A., Lapointe, F., Etchevers, H., De Robertis, E.M., and Le Douarin, N. (1999). Expression of Frzb-1 during chick development. *Mech. Dev.* 89, 179–183.
- Falcon, S., and Gentleman, R. (2007). Using GStats to test gene lists for GO term association. *Bioinformatics* 23, 257–258.
- Fernandez-Alonso, R., Davidson, L., Hukelmann, J., Zengerle, M., Prescott, A.R., Lamond, A., Ciulli, A., Sapkota, G.P., and Findlay, G.M. (2017). Brd4-Brd2 isoform switching coordinates pluripotent exit and Smad2-dependent lineage specification. *EMBO Rep.* 18, 1108–1122.
- Frints, S.G.M., Ozanturk, A., Rodríguez Criado, G., Grasshoff, U., de Hoon, B., Field, M., Manouvrier-Hanu, S., E Hickey, S., Kammoun, M., Gripp, K.W., et al. (2019). Pathogenic variants in E3 ubiquitin ligase RLIM/RNF12 lead to a syndromic X-linked intellectual disability and behavior disorder. *Mol. Psychiatry* 24, 1748–1768.
- Fukuhara, T., Hosoya, T., Shimizu, S., Sumi, K., Oshiro, T., Yoshinaka, Y., Suzuki, M., Yamamoto, N., Herzenberg, L.A., Herzenberg, L.A., and Hagiwara, M. (2006). Utilization of host SR protein kinases and RNA-splicing machinery during viral replication. *Proc. Natl. Acad. Sci. USA* 103, 11329–11333.
- Fukumoto, S., Miner, J.H., Ida, H., Fukumoto, E., Yuasa, K., Miyazaki, H., Hoffman, M.P., and Yamada, Y. (2006). Laminin alpha5 is required for dental epithelium growth and polarity and the development of tooth bud and shape. *J. Biol. Chem.* 281, 5008–5016.
- Funnell, T., Tasaki, S., Oloumi, A., Araki, S., Kong, E., Yap, D., Nakayama, Y., Hughes, C.S., Cheng, S.-W.G., Tozaki, H., et al. (2017). CLK-dependent exon recognition and conjoined gene formation revealed with a novel small molecule inhibitor. *Nat. Commun.* 8, 7.
- Gabut, M., Samavarchi-Tehrani, P., Wang, X., Slobodeniuc, V., O'Hanlon, D., Sung, H.K., Alvarez, M., Talukder, S., Pan, Q., Mazzoni, E.O., et al. (2011). An alternative splicing switch regulates embryonic stem cell pluripotency and reprogramming. *Cell* 147, 132–146.
- Gammill, L.S., Gonzalez, C., Gu, C., and Bronner-Fraser, M. (2006). Guidance of trunk neural crest migration requires neuropilin 2/semaphorin 3F signaling. *Development* 133, 99–106.
- Gontan, C., Achame, E.M., Demmers, J., Barakat, T.S., Rentmeester, E., van IJcken, W., Grootegoed, J.A., and Gribnau, J. (2012). RNF12 initiates X-chromosome inactivation by targeting REX1 for degradation. *Nature* 485, 386–390.
- Gontan, C., Mira-Bontenbal, H., Magaraki, A., Dupont, C., Barakat, T.S., Rentmeester, E., Demmers, J., and Gribnau, J. (2018). REX1 is the critical target of RNF12 in imprinted X chromosome inactivation in mice. *Nat. Commun.* 9, 4752.
- Gopinathan, G., Foyle, D., Luan, X., and Diekwisch, T.G.H. (2019). The Wnt antagonist SFRP1: a key regulator of periodontal mineral homeostasis. *Stem Cells Dev.* 28, 1004–1014.
- Gou, L.T., Lim, D.H., Ma, W., Aubol, B.E., Hao, Y., Wang, X., Zhao, J., Liang, Z., Shao, C., Zhang, X., et al. (2020). Initiation of parental genome reprogramming in fertilized oocyte by splicing kinase SRPK1-catalyzed protamine phosphorylation. *Cell* 180, 1212–1227.e14.
- Grandbarbe, L., Bouissac, J., Rand, M., Hrabé de Angelis, M., Artavanis-Tsakonas, S., and Mohier, E. (2003). Delta-notch signaling controls the generation of neurons/glia from neural stem cells in a stepwise process. *Development* 130, 1391–1402.
- Gui, J.F., Lane, W.S., and Fu, X.D. (1994a). A serine kinase regulates intracellular localization of splicing factors in the cell cycle. *Nature* 369, 678–682.
- Gui, J.F., Tronchère, H., Chandler, S.D., and Fu, X.D. (1994b). Purification and characterization of a kinase specific for the serine- and arginine-rich pre-mRNA splicing factors. *Proc. Natl. Acad. Sci. USA* 91, 10824–10828.
- Hargrave, M., Wright, E., Kun, J., Emery, J., Cooper, L., and Koopman, P. (1997). Expression of the Sox11 gene in mouse embryos suggests roles in neuronal maturation and epithelio-mesenchymal induction. *Dev. Dyn.* 210, 79–86.
- Hatcher, J.M., Wu, G., Zeng, C., Zhu, J., Meng, F., Patel, S., Wang, W., Ficarro, S.B., Leggett, A.L., Powell, C.E., et al. (2018). SRPKIN-1: a covalent SRPK1/2 inhibitor that potently converts VEGF from pro-angiogenic to anti-angiogenic isoform. *Cell Chem. Biol.* 25, 460–470.e6.
- Hill, C.R., Yuasa, M., Schoenecker, J., and Goudy, S.L. (2014). Jagged1 is essential for osteoblast development during maxillary ossification. *Bone* 62, 10–21.
- Hodge, R.D., Bakken, T.E., Miller, J.A., Smith, K.A., Barkan, E.R., Graybuck, L.T., Close, J.L., Long, B., Johansen, N., Penn, O., et al. (2019). Conserved cell types with divergent features in human versus mouse cortex. *Nature* 573, 61–68.
- Hong, Y., Chan, C.B., Kwon, I.S., Li, X., Song, M., Lee, H.P., Liu, X., Sompol, P., Jin, P., Lee, H.-G., et al. (2012). SRPK2 phosphorylates tau and mediates the cognitive defects in Alzheimer's disease. *J. Neurosci.* 32, 17262–17272.
- Hu, H., Haas, S.A., Chelly, J., Van Esch, H., Raynaud, M., de Brouwer, A.P., Weinert, S., Froyen, G., Frints, S.G., Laumonnier, F., et al. (2016). X-exome sequencing of 405 unresolved families identifies seven novel intellectual disability genes. *Mol. Psychiatry* 21, 133–148.
- Huang, H., Yang, X., Bao, M., Cao, H., Miao, X., Zhang, X., Gan, L., Qiu, M., and Zhang, Z. (2016). Ablation of the Sox11 gene results in clefting of the secondary palate resembling the Pierre Robin sequence. *J. Biol. Chem.* 291, 7107–7118.
- Hulo, N., Bairoch, A., Bulliard, V., Cerutti, L., De Castro, E., Langendijk-Genevaux, P.S., Pagni, M., and Sigrist, C.J. (2006). The PROSITE database. *Nucleic Acids Res.* 34, D227–D230.
- Humphreys, R., Zheng, W., Prince, L.S., Qu, X., Brown, C., Loomes, K., Huppert, S.S., Baldwin, S., and Goudy, S. (2012). Cranial neural crest ablation of Jagged1 recapitulates the craniofacial phenotype of Alagille syndrome patients. *Hum. Mol. Genet.* 21, 1374–1383.
- Jang, S.W., Liu, X., Fu, H., Rees, H., Yepes, M., Levey, A., and Ye, K. (2009). Interaction of Akt-phosphorylated SRPK2 with 14-3-3 mediates cell cycle and cell death in neurons. *J. Biol. Chem.* 284, 24512–24525.
- Jia, S., Kwon, H.E., Lan, Y., Zhou, J., Liu, H., and Jiang, R. (2016). Bmp4-Msx1 signaling and Osr2 control tooth organogenesis through antagonistic regulation of secreted Wnt antagonists. *Dev. Biol.* 420, 110–119.
- Jiao, B., Taniguchi-Ishigaki, N., Güngör, C., Peters, M.A., Chen, Y.W., Riethdorf, S., Drung, A., Ahronian, L.G., Shin, J., Pagnis, R., et al. (2013). Functional activity of RLIM/Rnf12 is regulated by phosphorylation-dependent nucleocytoplasmic shuttling. *Mol. Biol. Cell* 24, 3085–3096.
- Kamalakar, A., Oh, M.S., Stephenson, Y.C., Ballestas-Naissir, S.A., Davis, M.E., Willett, N.J., Drissi, H.M., and Goudy, S.L. (2019). A non-canonical

- JAGGED1 signal to JAK2 mediates osteoblast commitment in cranial neural crest cells. *Cell. Signal.* **54**, 130–138.
- Kinoshita, E., Kinoshita-Kikuta, E., Takiyama, K., and Koike, T. (2006). Phosphate-binding tag, a new tool to visualize phosphorylated proteins. *Mol. Cell. Proteomics* **5**, 749–757.
- Koizumi, J., Okamoto, Y., Onogi, H., Mayeda, A., Krainer, A.R., and Hagiwara, M. (1999). The subcellular localization of SF2/ASF is regulated by direct interaction with SR protein kinases (SRPKs). *J. Biol. Chem.* **274**, 11125–11131.
- Lee, G., Zheng, Y., Cho, S., Jang, C., England, C., Dempsey, J.M., Yu, Y., Liu, X., He, L., Cavaliere, P.M., et al. (2017). Post-transcriptional regulation of de novo lipogenesis by mTORC1-S6K1-SRPK2 signaling. *Cell* **171**, 1545–1558.e18.
- Leonardo, E.D., Hinck, L., Masu, M., Keino-Masu, K., Ackerman, S.L., and Tessier-Lavigne, M. (1997). Vertebrate homologues of *C. elegans* UNC-5 are candidate netrin receptors. *Nature* **386**, 833–838.
- Li, B., Kuriyama, S., Moreno, M., and Mayor, R. (2009). The posteriorizing gene *Gbx2* is a direct target of Wnt signalling and the earliest factor in neural crest induction. *Development* **136**, 3267–3278.
- Li, H.B., Jin, X.Q., Jin, X., Guo, Z.H., Ding, X.H., Wang, Q., and Liu, R.Z. (2018). BMP4 knockdown of NCSCs leads to aganglionosis in the middle embryonic stage. *Mol. Med. Rep.* **17**, 5423–5427.
- Lim, W.A., and Pawson, T. (2010). Phosphotyrosine signaling: evolving a new cellular communication system. *Cell* **142**, 661–667.
- Long, J.C., and Caceres, J.F. (2009). The SR protein family of splicing factors: master regulators of gene expression. *Biochem. J.* **417**, 15–27.
- Love, M.I., Huber, W., and Anders, S. (2014). Moderated estimation of fold change and dispersion for RNA-seq data with DESeq2. *Genome Biol.* **15**, 550.
- Ma, C.T., Velazquez-Dones, A., Hagopian, J.C., Ghosh, G., Fu, X.D., and Adams, J.A. (2008). Ordered multi-site phosphorylation of the splicing factor ASF/SF2 by SRPK1. *J. Mol. Biol.* **376**, 55–68.
- Mathew, R., Hartmuth, K., Möhlmann, S., Urlaub, H., Ficner, R., and Lührmann, R. (2008). Phosphorylation of human PRP28 by SRPK2 is required for integration of the U4/U6-U5 tri-snRNP into the spliceosome. *Nat. Struct. Mol. Biol.* **15**, 435–443.
- Micaglio, E., Andronache, A.A., Carrera, P., Monasky, M.M., Locati, E.T., Pirola, B., Presi, S., Carminati, M., Ferrari, M., Giamberti, A., and Pappone, C. (2019). Novel JAG1 deletion variant in patient with atypical Alagille syndrome. *Int. J. Mol. Sci.* **20**.
- Middelorp, J., and Hol, E.M. (2011). GFAP in health and disease. *Prog. Neurobiol.* **93**, 421–443.
- Nakagawa, O., Arnold, M., Nakagawa, M., Hamada, H., Shelton, J.M., Kusano, H., Harris, T.M., Childs, G., Campbell, K.P., Richardson, J.A., et al. (2005). Centronuclear myopathy in mice lacking a novel muscle-specific protein kinase transcriptionally regulated by MEF2. *Genes Dev.* **19**, 2066–2077.
- Ngo, J.C., Giang, K., Chakrabarti, S., Ma, C.T., Huynh, N., Hagopian, J.C., Dorresteijn, P.C., Fu, X.D., Adams, J.A., and Ghosh, G. (2008). A sliding docking interaction is essential for sequential and processive phosphorylation of an SR protein by SRPK1. *Mol. Cell* **29**, 563–576.
- Ngo, J.C., Gullingsrud, J., Giang, K., Yeh, M.J., Fu, X.D., Adams, J.A., McCammon, J.A., and Ghosh, G. (2007). SR protein kinase 1 is resilient to inactivation. *Structure* **15**, 123–133.
- Nikopoulos, G.N., Duarte, M., Kubu, C.J., Bellum, S., Friesel, R., Maciag, T., Prudovsky, I., and Verdi, J.M. (2007). Soluble Jagged1 attenuates lateral inhibition, allowing for the clonal expansion of neural crest stem cells. *Stem Cells* **25**, 3133–3142.
- Niranjan, T.S., Skinner, C., May, M., Turner, T., Rose, R., Stevenson, R., Schwartz, C.E., and Wang, T. (2015). Affected kindred analysis of human X chromosome exomes to identify novel X-linked intellectual disability genes. *PLoS One* **10**, e0116454.
- Okada, Y., and Hirokawa, N. (1999). A processive single-headed motor: kinesin superfamily protein KIF1A. *Science* **283**, 1152–1157.
- Parada, C., Han, D., Grimaldi, A., Sarrion, P., Park, S.S., Pelikan, R., Sanchez-Lara, P.A., and Chai, Y. (2015). Disruption of the ERK/MAPK pathway in neural crest cells as a potential cause of Pierre Robin sequence. *Development* **142**, 3734–3745.
- Pawellek, A., McElroy, S., Samatov, T., Mitchell, L., Woodland, A., Ryder, U., Gray, D., Lührmann, R., and Lamond, A.I. (2014). Identification of small molecule inhibitors of pre-mRNA splicing. *J. Biol. Chem.* **289**, 34683–34698.
- Pilia, G., Uda, M., Macis, D., Frau, F., Crisponi, L., Balli, F., Barbera, C., Colombo, C., Frediani, T., Gatti, R., et al. (1999). Jagged-1 mutation analysis in Italian Alagille syndrome patients. *Hum. Mutat* **14**, 394–400.
- Ponnusamy, M.P., Deb, S., Dey, P., Chakraborty, S., Rachagani, S., Senapati, S., and Batra, S.K. (2009). RNA polymerase II associated factor 1/PD2 maintains self-renewal by its interaction with Oct3/4 in mouse embryonic stem cells. *Stem Cells* **27**, 3001–3011.
- Roosenboom, J., Lee, M.K., Hecht, J.T., Heike, C.L., Wehby, G.L., Christensen, K., Feingold, E., Marazita, M.L., Maga, A.M., Shaffer, J.R., Weinberg, S.M., et al. (2018). Mapping genetic variants for cranial vault shape in humans. *PLoS One* **13**, e0196148.
- Roscigno, R.F., and Garcia-Blanco, M.A. (1995). SR proteins escort the U4/U6.U5 tri-snRNP to the spliceosome. *RNA* **1**, 692–706.
- Salomonis, N., Schlieve, C.R., Pereira, L., Wahlquist, C., Colas, A., Zamboni, A.C., Vranizan, K., Spindler, M.J., Pico, A.R., Cline, M.S., et al. (2010). Alternative splicing regulates mouse embryonic stem cell pluripotency and differentiation. *Proc. Natl. Acad. Sci. USA* **107**, 10514–10519.
- Sela-Donnenfeld, D., and Kalcheim, C. (1999). Regulation of the onset of neural crest migration by coordinated activity of BMP4 and Noggin in the dorsal neural tube. *Development* **126**, 4749–4762.
- Serafini, T., Colamarino, S.A., Leonardo, E.D., Wang, H., Beddington, R., Skarnes, W.C., and Tessier-Lavigne, M. (1996). Netrin-1 is required for commissural axon guidance in the developing vertebrate nervous system. *Cell* **87**, 1001–1014.
- Sgadò, P., Dunleavy, M., Genovesi, S., Provenzano, G., and Bozzi, Y. (2011). The role of GABAergic system in neurodevelopmental disorders: a focus on autism and epilepsy. *Int. J. Physiol. Pathophysiol. Pharmacol.* **3**, 223–235.
- Shin, J., Bossenz, M., Chung, Y., Ma, H., Byron, M., Taniguchi-Ishigaki, N., Zhu, X., Jiao, B., Hall, L.L., Green, M.R., et al. (2010). Maternal Rnf12/RLIM is required for imprinted X-chromosome inactivation in mice. *Nature* **467**, 977–981.
- Shin, J., Wallingford, M.C., Gallant, J., Marcho, C., Jiao, B., Byron, M., Bossenz, M., Lawrence, J.B., Jones, S.N., Mager, J., and Bach, I. (2014). RLIM is dispensable for X-chromosome inactivation in the mouse embryonic epiblast. *Nature* **511**, 86–89.
- Shin, J.-O., Kim, E.-J., Cho, K.-W., Nakagawa, E., Kwon, H.-J., Cho, S.-W., and Jung, H.-S. (2012). BMP4 signaling mediates Zeb family in developing mouse tooth. *Histochem. Cell Biol.* **137**, 791–800.
- Siebel, C.W., Feng, L., Guthrie, C., and Fu, X.D. (1999). Conservation in budding yeast of a kinase specific for SR splicing factors. *Proc. Natl. Acad. Sci. USA* **96**, 5440–5445.
- Smith-Hicks, C.L. (2013). GABAergic dysfunction in pediatric neuro-developmental disorders. *Front. Cell. Neurosci.* **7**, 269.
- Sock, E., Rettig, S.D., Enderich, J., Bösl, M.R., Tamm, E.R., and Wegner, M. (2004). Gene targeting reveals a widespread role for the high-mobility-group transcription factor Sox11 in tissue remodeling. *Mol. Cell. Biol.* **24**, 6635–6644.
- Teng, C.S., Yen, H.Y., Barske, L., Smith, B., Llamas, J., Segil, N., Go, J., Sanchez-Lara, P.A., Maxson, R.E., and Crump, J.G. (2017). Requirement for Jagged1-Notch2 signaling in patterning the bones of the mouse and human middle ear. *Sci. Rep.* **7**, 2497.
- Tønne, E., Holdhus, R., Stansberg, C., Stray-Pedersen, A., Petersen, K., Brunner, H.G., Gilissen, C., Hoischen, A., Prescott, T., Steen, V.M., and Fiskerstrand, T. (2015). Syndromic X-linked intellectual disability segregating with a missense variant in RLIM. *Eur. J. Hum. Genet.* **23**, 1652–1656.
- Toyofuku, T., Yoshida, J., Sugimoto, T., Yamamoto, M., Makino, N., Takamatsu, H., Takegahara, N., Suto, F., Hori, M., Fujisawa, H., et al. (2008). Repulsive and attractive semaphorins cooperate to direct the navigation of cardiac neural crest cells. *Dev. Biol.* **321**, 251–262.

- Traverse, S., Gomez, N., Paterson, H., Marshall, C., and Cohen, P. (1992). Sustained activation of the mitogen-activated protein (MAP) kinase cascade may be required for differentiation of PC12 cells. Comparison of the effects of nerve growth factor and epidermal growth factor. *Biochem. J.* **288**, 351–355.
- Varet, H., Brillet-Guéguen, L., Coppée, J.Y., and Dillies, M.A. (2016). SARTools: a DESeq2- and EdgeR-based R pipeline for comprehensive differential analysis of RNA-seq data. *PLoS One* **11**, e0157022.
- Wang, H.Y., Lin, W., Dyck, J.A., Yeakley, J.M., Songyang, Z., Cantley, L.C., and Fu, X.D. (1998). SRPK2: a differentially expressed SR protein-specific kinase involved in mediating the interaction and localization of pre-mRNA splicing factors in mammalian cells. *J. Cell Biol.* **140**, 737–750.
- Wang, X., and Astrof, S. (2016). Neural crest cell-autonomous roles of fibronectin in cardiovascular development. *Development* **143**, 88–100.
- Wang, Z.H., Liu, P., Liu, X., Manfredsson, F.P., Sandoval, I.M., Yu, S.P., Wang, J.Z., and Ye, K. (2017). Delta-secretase phosphorylation by SRPK2 enhances its enzymatic activity, provoking pathogenesis in Alzheimer's disease. *Mol. Cell* **67**, 812–825.e5.
- Wu, C.Y., and Taneyhill, L.A. (2012). Annexin a6 modulates chick cranial neural crest cell emigration. *PLoS One* **7**, e44903.
- Wu, J.Y., and Maniatis, T. (1993). Specific interactions between proteins implicated in splice site selection and regulated alternative splicing. *Cell* **75**, 1061–1070.
- Xiao, S.H., and Manley, J.L. (1997). Phosphorylation of the ASF/SF2 RS domain affects both protein-protein and protein-RNA interactions and is necessary for splicing. *Genes Dev.* **11**, 334–344.
- Yeakley, J.M., Tronchère, H., Olesen, J., Dyck, J.A., Wang, H.Y., and Fu, X.D. (1999). Phosphorylation regulates in vivo interaction and molecular targeting of serine/arginine-rich pre-mRNA splicing factors. *J. Cell Biol.* **145**, 447–455.
- Yen, H.Y., Ting, M.C., and Maxson, R.E. (2010). Jagged1 functions downstream of Twist1 in the specification of the coronal suture and the formation of a boundary between osteogenic and non-osteogenic cells. *Dev. Biol.* **347**, 258–270.
- York, J.R., Yuan, T., Lakiza, O., and McCauley, D.W. (2018). An ancestral role for Semaphorin3F-Neuropilin signaling in patterning neural crest within the new vertebrate head. *Development* **145**.
- Yu, H.H., and Moens, C.B. (2005). Semaphorin signaling guides cranial neural crest cell migration in zebrafish. *Dev. Biol.* **280**, 373–385.
- Zhang, L., Huang, H., Zhou, F., Schimmel, J., Pardo, C.G., Zhang, T., Barakat, T.S., Sheppard, K.A., Mickanin, C., Porter, J.A., et al. (2012). RNF12 controls embryonic stem cell fate and morphogenesis in zebrafish embryos by targeting Smad7 for degradation. *Mol. Cell* **46**, 650–661.
- Zhang, Y.B., Hu, J., Zhang, J., Zhou, X., Li, X., Gu, C., Liu, T., Xie, Y., Liu, J., Gu, M., et al. (2016). Genome-wide association study identifies multiple susceptibility loci for craniofacial microsomia. *Nat. Commun.* **7**, 10605.
- Zhu, S., Liu, W., Ding, H.F., Cui, H., and Yang, L. (2019). BMP4 and neuregulin regulate the direction of mouse neural crest cell differentiation. *Exp. Ther. Med.* **17**, 3883–3890.
- Zuniga, E., Stellabotte, F., and Crump, J.G. (2010). Jagged-notch signaling ensures dorsal skeletal identity in the vertebrate face. *Development* **137**, 1843–1852.

STAR★METHODS

KEY RESOURCES TABLE

| REAGENT or RESOURCE                                  | SOURCE                                                  | IDENTIFIER                               |
|------------------------------------------------------|---------------------------------------------------------|------------------------------------------|
| <b>Antibodies</b>                                    |                                                         |                                          |
| RNF12                                                | Novus Biologicals                                       | Cat#H00051132-M01; RRID: AB_547742       |
| ERK1                                                 | BD Biosciences                                          | Cat#610408; RRID: AB_397790              |
| SRPK1                                                | BD Biosciences                                          | Cat#611072; RRID: AB_398385              |
| SRPK2                                                | BD Biosciences                                          | Cat#611118; RRID: AB_398429              |
| HA-tag                                               | Abcam                                                   | Cat#ab9110; RRID: AB_307019              |
| REX1                                                 | Abcam                                                   | Cat#ab28141; RRID: AB_882332             |
| SRPK3                                                | R&D Systems                                             | Cat#MAB7230-SP                           |
| FLAG                                                 | Sigma Aldrich                                           | Cat#F1804-50UG; RRID: AB_262044          |
| HA-HRP                                               | Roche                                                   | Cat#12013819001; RRID: AB_390917         |
| Synaptophysin                                        | Cell Signaling Technologies                             | Cat#5461 (D35E4); RRID: AB_10698743      |
| beta-actin                                           | Cell Signaling Technologies                             | Cat#4970 (13E5); RRID: AB_2223172        |
| RNF12 (1-271)                                        | MRC-PPU Reagents and Services                           | Cat#S691D third bleed                    |
| RNF12 pSer212/214 (QRRARpSRpSPEHRR)                  | MRC-PPU Reagents and Services                           | Cat#SA310 fourth bleed                   |
| GST                                                  | MRC-PPU Reagents and Services                           | Cat#S902A third bleed                    |
| Phosphoepitope SR proteins                           | Millipore                                               | Cat#MABE50 clone 1H4; RRID: AB_10807429  |
| KLF4                                                 | R&D Systems                                             | Cat#AF3158; RRID: AB_2130245             |
| MAP2                                                 | Sigma Aldrich                                           | Cat#M2320; RRID: AB_609904               |
| HA-tag                                               | Sigma Aldrich                                           | Cat#A2095 agarose beads; RRID: AB_257974 |
| <b>Chemicals, Peptides, and Recombinant Proteins</b> |                                                         |                                          |
| AZ191                                                | Tocris                                                  | Cat#5232                                 |
| KH-CB19                                              | Merck Millipore                                         | Cat#219511                               |
| CLK-IN-T3                                            | Aobios                                                  | Cat#AOB8827                              |
| SPHINX31                                             | Axon Medchem                                            | Cat#Axon 2714                            |
| CHIR99021                                            | Axon Medchem                                            | Cat#Axon 1386                            |
| PD0325901                                            | Axon Medchem                                            | Cat#Axon 1408                            |
| VX-745                                               | Selleckchem                                             | Cat#S1458                                |
| JNK-IN-8                                             | Selleckchem                                             | Cat#S4901                                |
| RO-3306                                              | Sigma Aldrich                                           | Cat#SML0569                              |
| Flavopiridol                                         | Stratech                                                | Cat#S2679                                |
| CCT241533                                            | Cayman                                                  | Cat#CAY19178                             |
| Harmine                                              | Sigma Aldrich                                           | Cat#286044                               |
| WEHI-345                                             | Cayman                                                  | Cat#CAY23023                             |
| IRAK-4 Ina                                           | MRC-PPU Reagents and Services                           | N/A                                      |
| GSK461364                                            | Cayman                                                  | Cat#CAY18099                             |
| SRPIN340                                             | Sigma Aldrich                                           | Cat#SML1088                              |
| MG132                                                | Sigma Aldrich                                           | Cat#C2211                                |
| Cycloheximide                                        | Sigma Aldrich                                           | Cat#C7698                                |
| Leptomycin B                                         | Sigma Aldrich                                           | Cat#L2913                                |
| Madrasin (DDD00107587)                               | Kind gift of Dr. Andrea Pawellek (University of Dundee) | N/A                                      |
| Phos-Tag                                             | MRC-PPU Reagents and Services                           | N/A                                      |
| RNF12                                                | MRC-PPU Reagents and Services                           | DU61098                                  |
| RNF12 S212A S214A S227A S229A                        | MRC-PPU Reagents and Services                           | DU53249                                  |
| DYRK1a                                               | MRC-PPU Reagents and Services                           | DU19040                                  |

(Continued on next page)

| <b>Continued</b>                                                 |                                                                                                          |                                                                                                                                     |
|------------------------------------------------------------------|----------------------------------------------------------------------------------------------------------|-------------------------------------------------------------------------------------------------------------------------------------|
| REAGENT or RESOURCE                                              | SOURCE                                                                                                   | IDENTIFIER                                                                                                                          |
| CLK2                                                             | MRC-PPU Reagents and Services                                                                            | DU16987                                                                                                                             |
| GSK3beta                                                         | MRC-PPU Reagents and Services                                                                            | DU899                                                                                                                               |
| ERK1 (MAPK3)                                                     | MRC-PPU Reagents and Services                                                                            | DU1509                                                                                                                              |
| ERK2 (MAPK1)                                                     | MRC-PPU Reagents and Services                                                                            | DU650                                                                                                                               |
| JNK3 alpha 1 (SAPK1b)                                            | MRC-PPU Reagents and Services                                                                            | DU1511                                                                                                                              |
| p38 alpha (SAPK2a)                                               | MRC-PPU Reagents and Services                                                                            | DU979                                                                                                                               |
| CDK2 - CyclinA                                                   | MRC-PPU Reagents and Services                                                                            | DU43557                                                                                                                             |
| CDK5 - p35                                                       | MRC-PPU Reagents and Services                                                                            | DU39816                                                                                                                             |
| CDK7 - MAT1 - Cyclin H                                           | MRC-PPU Reagents and Services                                                                            | DU49574                                                                                                                             |
| CDK9 - Cyclin T1                                                 | MRC-PPU Reagents and Services                                                                            | DU31050                                                                                                                             |
| REX1                                                             | MRC-PPU Reagents and Services                                                                            | DU53244                                                                                                                             |
| SMAD7                                                            | MRC-PPU Reagents and Services                                                                            | DU19219                                                                                                                             |
| SRPK1                                                            | MRC-PPU Reagents and Services                                                                            | DU967                                                                                                                               |
| SRPK2                                                            | MRC-PPU Reagents and Services                                                                            | DU36135                                                                                                                             |
| SRPK3                                                            | MRC-PPU Reagents and Services                                                                            | DU967                                                                                                                               |
| SRPK1 D497A                                                      | MRC-PPU Reagents and Services                                                                            | DU66208                                                                                                                             |
| SRPK2 D541A                                                      | MRC-PPU Reagents and Services                                                                            | DU66209                                                                                                                             |
| SRPK3 H159D                                                      | MRC-PPU Reagents and Services                                                                            | DU61121                                                                                                                             |
| SRPK3 T211M                                                      | MRC-PPU Reagents and Services                                                                            | DU61140                                                                                                                             |
| SRPK3 K270M                                                      | MRC-PPU Reagents and Services                                                                            | DU61135                                                                                                                             |
| Ube1                                                             | MRC-PPU Reagents and Services                                                                            | DU32888                                                                                                                             |
| UBE2D1 (UbcH5a)                                                  | MRC-PPU Reagents and Services                                                                            | DU4315                                                                                                                              |
| FLAG-Ubiquitin                                                   | MRC-PPU Reagents and Services                                                                            | DU46789                                                                                                                             |
| Ubiquitin                                                        | MRC-PPU Reagents and Services                                                                            | DU20027                                                                                                                             |
| Ubiquitin IR-800                                                 | Walden lab (Uni of Glasgow)                                                                              | N/A                                                                                                                                 |
| <b>Critical Commercial Assays</b>                                |                                                                                                          |                                                                                                                                     |
| SRPKIN-1 kinase inhibitor profiling                              | This paper                                                                                               | <a href="http://www.kinase-screen.mrc.ac.uk/services/express-screen">http://www.kinase-screen.mrc.ac.uk/services/express-screen</a> |
| <b>Deposited Data</b>                                            |                                                                                                          |                                                                                                                                     |
| Raw RNA-SEQ data                                                 | This paper                                                                                               | GEO: GSE149554                                                                                                                      |
| Raw Brain Cortex Single Nucleus RNA-SEQ data                     | <a href="#">Hodge et al., 2019</a>                                                                       | dbGAP: phs001790                                                                                                                    |
| Raw hiPSC mass-spectrometry data                                 | <a href="#">Brenes et al., 2020</a>                                                                      | PRIDE: PXD010557                                                                                                                    |
| <b>Experimental Models: Cell Lines</b>                           |                                                                                                          |                                                                                                                                     |
| Mouse: Embryonic Stem Cells                                      | Laboratory of Janet Rossant, SickKids Research Institute, Toronto                                        | CCE line                                                                                                                            |
| Human: induced Pluripotent Stem Cells                            | Cellartis AB<br>Human Pluripotent Stem Cell Core Facility, School of Life Sciences, University of Dundee | CHIPS4 line                                                                                                                         |
| Human: Neuro2A                                                   | ATCC                                                                                                     | Cat#CCL-131                                                                                                                         |
| Human: HEK 293                                                   | ATCC                                                                                                     | Cat#CRL-1573                                                                                                                        |
| Human: U2OS                                                      | ATCC                                                                                                     | Cat#HTB-96                                                                                                                          |
| Human: MCF7                                                      | ATCC                                                                                                     | Cat#CRL-3435                                                                                                                        |
| <b>Experimental Models: Organisms/Strains</b>                    |                                                                                                          |                                                                                                                                     |
| Mouse: C57B6/J                                                   | Animal Facility, School of Life Sciences, University of Dundee                                           | N/A                                                                                                                                 |
| <b>Oligonucleotides</b>                                          |                                                                                                          |                                                                                                                                     |
| Primers for qRT-PCR, see <a href="#">Table S8</a>                | This paper                                                                                               | N/A                                                                                                                                 |
| Primers for genomic DNA sequencing, see <a href="#">Table S8</a> | This paper                                                                                               | N/A                                                                                                                                 |
| gRNA sequences for CRISPR/Cas9, see <a href="#">Table S8</a>     | This paper                                                                                               | N/A                                                                                                                                 |

(Continued on next page)

**Continued**

| REAGENT or RESOURCE                                  | SOURCE                                  | IDENTIFIER                                                                                                                                                                                                                                                                |
|------------------------------------------------------|-----------------------------------------|---------------------------------------------------------------------------------------------------------------------------------------------------------------------------------------------------------------------------------------------------------------------------|
| ON-TARGETplus Srpk2 siRNA 06                         | Horizon Discovery                       | Cat#J-055142-06-0010                                                                                                                                                                                                                                                      |
| Non-targeting Pool siRNA                             | Horizon Discovery                       | Cat#D-001810-10-05                                                                                                                                                                                                                                                        |
| Recombinant DNA                                      |                                         |                                                                                                                                                                                                                                                                           |
| pCAGGS PURO RNF12                                    | MRC-PPU Reagents and Services           | DU50610                                                                                                                                                                                                                                                                   |
| pCAGGS PURO RNF12 S212A                              | MRC-PPU Reagents and Services           | DU53528                                                                                                                                                                                                                                                                   |
| pCAGGS PURO RNF12 S214A                              | MRC-PPU Reagents and Services           | DU50796                                                                                                                                                                                                                                                                   |
| pCAGGS PURO RNF12 S227A                              | MRC-PPU Reagents and Services           | DU53591                                                                                                                                                                                                                                                                   |
| pCAGGS PURO RNF12 S229A                              | MRC-PPU Reagents and Services           | DU53592                                                                                                                                                                                                                                                                   |
| pCAGGS PURO RNF12 S212A S214A                        | MRC-PPU Reagents and Services           | DU53518                                                                                                                                                                                                                                                                   |
| pCAGGS PURO RNF12 S227A S229A                        | MRC-PPU Reagents and Services           | DU53514                                                                                                                                                                                                                                                                   |
| pCAGGS PURO RNF12 S214A S229A                        | MRC-PPU Reagents and Services           | DU53593                                                                                                                                                                                                                                                                   |
| pCAGGS PURO RNF12 S212A S214A S227A S229A            | MRC-PPU Reagents and Services           | DU50797                                                                                                                                                                                                                                                                   |
| pCAGGS PURO RNF12 delta SR-motif                     | MRC-PPU Reagents and Services           | DU53413                                                                                                                                                                                                                                                                   |
| pCAGGS PURO HA-RNF12                                 | MRC-PPU Reagents and Services           | DU50854                                                                                                                                                                                                                                                                   |
| pCAGGS PURO HA-RNF12 S212A S214A S227A S229A         | MRC-PPU Reagents and Services           | DU58741                                                                                                                                                                                                                                                                   |
| pCAGGS PURO RNF12 W576Y                              | MRC-PPU Reagents and Services           | DU50800                                                                                                                                                                                                                                                                   |
| pCAGGS PURO FLAG SRPK1                               | MRC-PPU Reagents and Services           | DU53820                                                                                                                                                                                                                                                                   |
| pCAGGS PURO FLAG SRPK2                               | MRC-PPU Reagents and Services           | DU53821                                                                                                                                                                                                                                                                   |
| pKN7 RLIM ex5 KO Sense A                             | MRC-PPU Reagents and Services           | DU52037                                                                                                                                                                                                                                                                   |
| pX335 RLIM ex5 KO antisense A + Cas9n                | MRC-PPU Reagents and Services           | DU52046                                                                                                                                                                                                                                                                   |
| pBabeD P U6 RLIM (mouse) Cter KI Sense A             | MRC-PPU Reagents and Services           | DU57881                                                                                                                                                                                                                                                                   |
| pX335 RLIM (mouse) Cter KI AntiSense A               | MRC-PPU Reagents and Services           | DU57891                                                                                                                                                                                                                                                                   |
| pMA RLIM Cter R575C IRES-GFP donor                   | MRC-PPU Reagents and Services           | DU57963                                                                                                                                                                                                                                                                   |
| pMA RLIM Cter del 206-229 IRES-GFP donor             | MRC-PPU Reagents and Services           | DU57964                                                                                                                                                                                                                                                                   |
| pMA RLIM Cter S212A S214A S227A S229A IRES-GFP donor | MRC-PPU Reagents and Services           | DU57966                                                                                                                                                                                                                                                                   |
| pMA RLIM Cter wt control IRES-GFP donor              | MRC-PPU Reagents and Services           | DU57967                                                                                                                                                                                                                                                                   |
| pMA RLIM Cter W576Y IRES-GFP donor                   | MRC-PPU Reagents and Services           | DU60290                                                                                                                                                                                                                                                                   |
| pBabeD P U6 Srpk1 (mouse) ex3 KO Sense B             | MRC-PPU Reagents and Services           | DU60949                                                                                                                                                                                                                                                                   |
| pX335 Srpk1 (mouse) ex3 KO Antisense B               | MRC-PPU Reagents and Services           | DU64462                                                                                                                                                                                                                                                                   |
| pBabeD P U6 SRPK2 (mouse) ex5 KO Sense A             | MRC-PPU Reagents and Services           | DU64247                                                                                                                                                                                                                                                                   |
| pX335 SRPK2 (mouse) ex5 KO Antisense A               | MRC-PPU Reagents and Services           | DU 64251                                                                                                                                                                                                                                                                  |
| pBabeD P U6 ZFP42 (mouse) ex4 KO Sense A             | MRC-PPU Reagents and Services           | DU60065                                                                                                                                                                                                                                                                   |
| pX335 ZFP42 (mouse) ex4 KO AntiSense A               | MRC-PPU Reagents and Services           | DU60072                                                                                                                                                                                                                                                                   |
| Software and Algorithms                              |                                         |                                                                                                                                                                                                                                                                           |
| ScanProsite                                          | <a href="#">Hulo et al., 2006</a>       | <a href="https://prosite.expasy.org/scanprosite/">https://prosite.expasy.org/scanprosite/</a>                                                                                                                                                                             |
| Image Studio                                         | LICOR Biosciences                       | <a href="https://www.licor.com/bio/image-studio/">https://www.licor.com/bio/image-studio/</a>                                                                                                                                                                             |
| Image Lab                                            | Bio-Rad                                 | <a href="https://www.bio-rad.com/en-uk/product/image-lab-software?ID=KRE6P5E8Z">https://www.bio-rad.com/en-uk/product/image-lab-software?ID=KRE6P5E8Z</a>                                                                                                                 |
| Kinoviewer                                           | <a href="#">Brenes and Lamond, 2019</a> | <a href="https://peptracker.com">https://peptracker.com</a>                                                                                                                                                                                                               |
| Proteome Discoverer v.2.0                            | ThermoFisher                            | <a href="https://www.thermofisher.com/order/catalog/product/OPTON-30812?SID=srch-srp-OPTON-30812#/OPTON-30812?SID=srch-srp-OPTON-30812">https://www.thermofisher.com/order/catalog/product/OPTON-30812?SID=srch-srp-OPTON-30812#/OPTON-30812?SID=srch-srp-OPTON-30812</a> |
| Mascot                                               | Matrix Science                          | <a href="https://www.matrixscience.com/server.html">https://www.matrixscience.com/server.html</a>                                                                                                                                                                         |
| Image J                                              | NIH                                     | <a href="https://imagej.nih.gov/ij/download.html">https://imagej.nih.gov/ij/download.html</a>                                                                                                                                                                             |
| STAR software (v2.7.1a)                              | <a href="#">Dobin et al., 2013</a>      | <a href="https://github.com/alexdobin/STAR">https://github.com/alexdobin/STAR</a>                                                                                                                                                                                         |
| HTSeq (v0.11.2)                                      | <a href="#">Anders et al., 2015</a>     | <a href="https://htseq.readthedocs.io/en/master/">https://htseq.readthedocs.io/en/master/</a>                                                                                                                                                                             |

(Continued on next page)

**Continued**

| REAGENT or RESOURCE    | SOURCE                     | IDENTIFIER                                                                                                                                              |
|------------------------|----------------------------|---------------------------------------------------------------------------------------------------------------------------------------------------------|
| SARTools (v1.6.9)      | Varet et al., 2016         | <a href="https://github.com/PF2-pasteur-fr/SARTools">https://github.com/PF2-pasteur-fr/SARTools</a>                                                     |
| DESeq2 (v1.24)         | Love et al., 2014          | <a href="https://bioconductor.org/packages/release/bioc/html/DESeq2.html">https://bioconductor.org/packages/release/bioc/html/DESeq2.html</a>           |
| GOstats (v2.50.0)      | Falcon and Gentleman, 2007 | <a href="https://www.bioconductor.org/packages/release/bioc/html/GOstats.html">https://www.bioconductor.org/packages/release/bioc/html/GOstats.html</a> |
| GraphPad Prism (v7.0c) | GraphPad Software Inc.     | <a href="https://www.graphpad.com/scientific-software/prism/">https://www.graphpad.com/scientific-software/prism/</a>                                   |

**RESOURCE AVAILABILITY**

**Lead Contact**

Further information and requests for resources and reagents should be directed to and will be fulfilled by the Lead Contact, Greg Findlay ([g.m.findlay@dundee.ac.uk](mailto:g.m.findlay@dundee.ac.uk)).

**Materials Availability**

Plasmids and antibodies generated in this study have been deposited to MRC-PPU Reagents & Services (<http://mrcppureagents.dundee.ac.uk/>).

**Data and Code Availability**

The accession number for the RNA sequencing dataset generated during this study is Gene Expression Omnibus (GEO): GSE149554 (<https://www.ncbi.nlm.nih.gov/geo/query/acc.cgi?acc=GSE149554>).

Original source data have been deposited to Mendeley Data: <https://doi.org/10.17632/phjvdpdzp57.1>

**EXPERIMENTAL MODEL AND SUBJECT DETAILS**

**Cell Lines**

**Mouse Embryonic Stem Cells (mESCs)**

Wild-type and CRISPR Cas9 edited male mESCs (CCE line) were cultured in 0.1% gelatin [w/v] coated plates in DMEM containing 10% foetal calf serum [v/v], 5% Knock-Out serum replacement [v/v], 2 mM glutamine, 0.1 mM MEM non-essential amino acids, 1 mM sodium pyruvate, and penicillin/streptomycin (all from Thermo Fisher Scientific), 0.1 mM beta-mercaptoethanol (Sigma Aldrich), and 100 ng/ml GST-tagged Leukaemia inhibitory factor (LIF) at 5% CO<sub>2</sub> and 37°C. For 2i culture, mESCs were converted from LIF/FBS to 2i culture media composed of N2B27: 1% B27 supplement [v/v], 0.5% N2 supplement [v/v], 2 mM glutamine (all from Thermo Fisher Scientific), 0.1 mM β-mercaptoethanol (Sigma Aldrich), and penicillin/streptomycin in 1:1 DMEM/F12:Neurobasal medium (both from Thermo Fisher Scientific with 1 μM PD0325901 and 1 μM CHIR99021) and neural differentiation induced by culturing cells in N2B27. Cells were routinely authenticated via morphology and pluripotency gene expression analysis.

**Human Induced Pluripotent Stem Cells (hiPSCs)**

hiPSCs (CHiPS4 male cell line) were cultured in feeder-free conditions in TeSR medium supplemented with Noggin (10 ng/ml, Peprotech) and bFGF (30 ng/ml, Peprotech) on plates coated with Geltrex matrix (20 μg/cm<sup>2</sup>, Life Technologies) at 5% CO<sub>2</sub> and 37°C. Cells were routinely authenticated via morphology and pluripotency gene expression analysis

**Other Mammalian Cell Lines**

Male mouse Neuro 2a and female human U2OS, HEK 293 and MCF7 cell lines were grown in DMEM containing 10% foetal calf serum [v/v] at 5% CO<sub>2</sub> and 37°C. Cells were routinely authenticated via morphology analysis.

**Animal Studies**

**Primary Mouse Cortical Neurons**

E16.5 C57BL/6 female and male mice brains were placed in ice cold HBSS, meninges removed, and cortex dissected. Cortex tissue was incubated with 0.125% trypsin containing DNase at 37°C for 30 minutes. Samples were centrifuged at 1,200 rpm for 5 minutes and resuspended in complete Neurobasal media (Neurobasal containing 2 mM Glutamax, 2% B27 supplement [v/v], 10% foetal calf serum [v/v] and penicillin/streptomycin) and filtered through a 40 μm pore filter. Cells were then centrifuged for 7 minutes at 700 rpm, resuspended in complete Neurobasal media and plated at 0.5 x 10<sup>6</sup> cells/well on 6-well plates coated with 0.1 mg/ml poly-L-lysine (PLL; Sigma Aldrich). Neurons were cultured at 37°C in a humidified incubator with 5% CO<sub>2</sub> and medium replaced every 5 days with fresh medium containing B27.



### Mouse Organs

19-week-old male C57BL/6J mice were dissected, organs collected and wrapped in tinfoil and snap frozen in liquid nitrogen. Organs were then resuspended in lysis buffer and lysed using a Polytrone PT 1200 E homogeniser (Kinematica, Littau-Lucerne, Switzerland) on ice. Samples were then clarified for 20 min at 14,000 rpm at 4°C and subjected to immunoblot analysis.

### Ethics

Mouse studies were approved by the University of Dundee ethical review committee, and further subjected to approved study plans by the Named Veterinary Surgeon and Compliance Officer (Dr. Ngaire Dennison) and performed under a UK Home Office project licence in accordance with the Animal Scientific Procedures Act (ASPA, 1986). Mice were housed in a SPF facility in temperature-controlled rooms at 21°C, with 45–65% relative humidity and 12-hour light/dark cycles. Mice had *ad libitum* access to food and water and regularly monitored by the School of Life Science Animal Unit Staff.

## METHOD DETAILS

### Serine-Arginine Motif Search

Proteins containing tandem Serine-Arginine motifs were identified by searching the ScanProsite tool (Hulo et al., 2006) (ExPASy, Swiss Institute of Bioinformatics) for a R-S-R-S-x(0,20)-R-S-R-S motif where x is any amino acid and (0,20) the numerical range of intervening amino acids. The motif was searched against the UniProtKB database for *Mus musculus* proteome (TaxID: 10090). The resulting proteins were categorised according to UniProt functional description and listed in Table S1.

### Plasmid and siRNA Transfection

mESCs were transfected with Lipofectamine LTX (Thermo Fisher Scientific) according to manufacturer instructions. All cDNA plasmids generated and used in this study are summarised in the Key Resource Table and can be found at MRC-PPU Reagents and services website <http://mrcppureagents.dundee.ac.uk/>. mESCs were transfected with siRNA using Lipofectamine RNAiMAX reagent (Thermo Fisher Scientific). siRNA oligos are listed in the Key Resource Table.

### CRISPR/Cas9 Gene Editing

*Rlim*<sup>-/-</sup> mESCs were described previously (Bustos et al., 2018). To generate CRISPR Cas9 knockout mESC lines wild-type (for *Srpk1* and *Srpk2*) or *Rlim*<sup>-/-</sup> (for *Zfp42*) mESCs were transfected with pX335 and pKN7 vectors containing gRNA sequences targeting *Srpk1* exon 3, *Srpk2* exon 5 or *Zfp42* exon 4 (detailed in Key Resource Table). *Rlim* WT-IRES-GFP (RNF12 WT-KI) and R575C-IRES-GFP (RNF12 R575C-KI) knock-in mESCs were described previously (Bustos et al., 2018). To generate *Rlim* S212A S214A S227A S229A-IRES-GFP (RNF12 4xSA-KI), *Rlim* with amino acids 206–229 deleted IRES-GFP (RNF12 ΔSR-KI) and *Rlim* W576Y-IRES-GFP (RNF12 W576Y-KI) knock-in mESC lines, wild-type mESCs were transfected with pBABED Puro U6 and pX335 vectors encoding guide RNAs targeting *Rlim* gene (detailed in Key Resource Table) together with donor pMa vectors containing DNA sequence encoding RNF12 amino acids 84 to 600 harbouring the desired mutations followed by an IRES (internal ribosome entry site) and EGFP. Transfected cells were selected with 3 μg/ml puromycin for 48 h and subjected to single cell sorting. Expanded knock-out single mESC clones were screened via immunoblot. EGFP positive knock-in single mESCs were expanded and screened for EGFP expression and RNF12 size or phosphorylation via immunoblot. Mutations were confirmed by genomic DNA sequencing. All cDNA plasmids are detailed in the Key Resource Table. Guide RNA and primer sequences are detailed in Table S8.

### Pharmacological Inhibitors

All compounds were diluted in DMSO and mESCs treated with 10 μM inhibitor for 4 h prior lysis unless indicated otherwise. For protein stability assays, protein synthesis was inhibited by treating mESCs with 350 μM cycloheximide (Sigma Aldrich). For proteasome inhibition mESCs were treated with 10 μM MG132 (Sigma Aldrich) for 6 h. All chemicals are listed in the Key Resource Table.

### Kinase Inhibitor Profiling

SRPKIN-1 inhibition activity was analysed using *in vitro* kinase assays for 50 representative kinases (MRC-PPU International Centre for Kinase Profiling). Kinase activity towards specific peptides was assessed in comparison to DMSO control. Full details are available at <http://www.kinase-screen.mrc.ac.uk/services/express-screen>.

### Immunoblotting and Phos-Tag Analysis

SDS-PAGE electrophoresis and immunoblotting was performed using standard methods. Cells were lysed in lysis buffer (20 mM Tris [pH 7.4], 150 mM NaCl, 1 mM EDTA, 1% NP-40 [v/v], 0.5% sodium deoxycholate [w/v], 10 mM β-glycerophosphate, 10 mM sodium pyrophosphate, 1 mM NaF, 2 mM Na<sub>3</sub>VO<sub>4</sub>, and Roche Complete Protease Inhibitor Cocktail Tablets). Phospho-specific antibodies were used at 1 μg/ml with 10 μg/ml of the corresponding non-phosphopeptide. After secondary antibody incubation, membranes were subjected to chemiluminescence detection with Immobilon Western Chemiluminescent HRP Substrate (Millipore) using a Gel-Doc XR+ System (Bio-Rad) or Infrared detection using a LI-COR Odyssey Clx system. REX1 protein levels were determined by immunoblotting REX1 immunoprecipitates using Clean-Blot IP Detection Reagent (Thermo Fisher Scientific).

Phos-tag analyses were performed by loading protein samples containing 10 mM MnCl<sub>2</sub> in 8% polyacrylamide gels containing 50 μM Phos-tag reagent (MRC-PPU reagents and services) and 0.1 mM MnCl<sub>2</sub>. After electrophoresis, gels were washed three times

for 10 mins in Transfer buffer (48 mM Tris, 39 mM Glycine, 20% Methanol) supplemented with 20 mM EDTA. Proteins were then transferred to Nitrocellulose membranes, blocked and probed with the indicated antibodies. All protein signals were quantified using Image Studio (LI-COR Biosciences) or Image Lab software (Bio-Rad). Primary antibodies are listed in the [Key Resource Table](#).

### Mass Spectrometry

For phospho-site identification samples were separated via SDS-PAGE electrophoresis, stained with Coomassie blue and gel pieces subjected to an in-gel digestion. First, gel pieces were washed in water, 50% acetonitrile (ACN)/water, 0.1 M  $\text{NH}_4\text{HCO}_3$  and 50% ACN/50 mM  $\text{NH}_4\text{HCO}_3$  and then with 10 mM DTT/0.1 M  $\text{NH}_4\text{HCO}_3$  (All from Sigma-Aldrich). Proteins were alkylated with 50 mM iodoacetamide/0.1 M  $\text{NH}_4\text{HCO}_3$  and then washed as above. Gel pieces were then shrunk in ACN and dried using Speed-Vac. Proteins were then trypsinised by incubating with 5  $\mu\text{g}/\text{ml}$  trypsin in 25 mM triethylammonium bicarbonate (Sigma-Aldrich) overnight. Supernatants were separated and gel pieces resuspended in 50% ACN/2.5% formic acid and supernatants combined. Samples were then dried via Speed-Vac and then resuspended in 30  $\mu\text{l}$  0.1% formic acid and subjected to liquid chromatography–mass spectrometry (LC-MS) analysis using an Ultimate 3000 RSLCnano system coupled to LTQ-Orbitrap VelosPro mass spectrometer (ThermoFisher Scientific) 10  $\mu\text{l}$  samples were injected and peptides were loaded onto a nanoViper C18 Trap column (5  $\mu\text{m}$  particle size, 100  $\mu\text{m}$  x 2 cm) and separated in a C18 reversed phase Easy-spray column (2  $\mu\text{m}$  particle size, 75  $\mu\text{m}$  x 50 cm) (ThermoFisher Scientific) at a flow rate of 300 nL/min. A linear gradient was used, starting at 3% B and maintained for 5 min, from 3–35% B in 40 min, 35–99% B for 2 min, maintained at 99% B for 5 min, 99–3% B in 3 min and maintained at 3% B for 5 min. Solvents used were A: 0.1% formic acid and B: 80% acetonitrile (ACN) with 0.08% formic acid.

Mass Spectrometry data was acquired in data-dependent mode using the following parameters: MS1 spectra were acquired in the Orbitrap at a resolution of 60,000 (at 400 m/z) for a mass range of 375–1600 m/z with a FTMS full AGC target of  $1\text{e}6$ . The top 20 most intense ions (with a minimal signal threshold of 2000) were selected for MS2 analysis on the linear ion trap (with a full AGC target of 5,000) and were fragmented (using CID with a collision energy of 35%), multistage activation, and neutral loss masses of 24.4942, 32.6590, 48.9885.

Data was analysed using Proteome Discoverer v.2.0 and Mascot using MRC\_Database\_1 (1,950 sequences). Parameters used were the following: Variable modifications: Oxidation (M), Dioxidation (M), Phospho (STY); Fixed modifications: Carbamidomethyl (C), Enzyme: Trypsin/P, Maximum missed cleavages: 3, Precursor tolerance: 10ppm, MS2 tolerance: 0.6Da, Minimum score peptides: 18. Phospho-site assignment probability was estimated via Mascot and PhosphoRS3.1 (Proteome Discoverer v.1.4-SP1) or ptmRS (Proteome Discoverer v.2.0).

Quantitative total mESC proteomics data covering around 10,000 proteins was previously described ([Fernandez-Alonso et al., 2017](#)). CMGC kinase expression from that dataset was generated using Kinoviewer (<https://peptracker.com>) ([Brenes and Lamond, 2019](#)). Quantitative total proteomics data from human induced pluripotent stem cells (hiPSC, bubh\_3 line) was obtained from the human induced pluripotent stem cell initiative (HipSci) database ([Brenes et al., 2020](#)).

### Protein Expression and Purification

All recombinant proteins were produced in *E. coli* or SF21 insect cells expression systems by MRC-PPU reagents and services and purified via standard protocols. Proteins used in this study are listed in the [Key Resource Table](#) and can be found at the MRC-PPU Reagents and services website <http://mrcppureagents.dundee.ac.uk/>.

### In Vitro Kinase Assays

For SRPK Immunoprecipitation kinase assays, mESCs were treated with 10  $\mu\text{M}$  SRPKIN-1 for 4 h. Cells were lysed, and 1.5 mg of protein immunoprecipitated with 2  $\mu\text{g}$  of SRPK1 or SRPK2 antibodies (BD Biosciences). Immunoprecipitates were then washed with lysis buffer supplemented with 500 mM NaCl and half of the sample was resuspended in loading buffer. The remainder was subjected to *in vitro* phosphorylation assay containing 0.5  $\mu\text{g}$  RNF12 and 2 mM ATP in kinase buffer (50 mM Tris-HCl [pH 7.5], 0.1 mM EGTA, 10 mM  $\text{MgCl}_2$ , 2 mM DTT) and incubated at 30°C for 30 min. SRPK *in vitro* kinase assays were performed by incubating 200 mU kinase or equivalent  $\mu\text{g}$  of inactive kinase with 0.5  $\mu\text{g}$  RNF12 and 2 mM ATP in kinase buffer. For radioactive *in vitro* kinase assays, reactions were supplemented with 1  $\mu\text{Ci}$   $\gamma$ - $^{32}\text{P}$  ATP. Reactions were incubated at 30°C for 30 min in presence or absence of inhibitor as indicated and samples subjected to polyacrylamide electrophoresis and immunoblot or Coomassie blue staining and signal detected via ECL, infrared detection or autoradiography.

### Immunofluorescence

Immunofluorescence and confocal analysis were performed as described. mESCs were plated in 0.1% gelatin [v/v] coated coverslips. Cortical neurons were plated at a density of  $1.5 \times 10^5$  cells/well on poly-L-lysine German Glass Coverslips 18mm #1½ (EMSDiasum). Primary antibodies used are listed in the [Key Resource Table](#). Cells were mounted using Fluorsave reagent (Millipore). Images were acquired in a Zeiss 710 confocal microscope and images were processed using Image J (NIH) and Photoshop CS5.1 software (Adobe). Nuclear and cytosolic staining intensity was determined using ImageJ (NIH).

### In Vitro Phospho-RNF12 Activity Assays

For substrate ubiquitylation assays, 0.5  $\mu\text{g}$  RNF12 protein was subjected to a phosphorylation reaction containing 200 mU SRPK or equivalent  $\mu\text{g}$  of catalytically inactive kinase and 2 mM ATP in kinase buffer for 1 h at 37°C. 200 nM phosphorylated RNF12 was then

incubated with a ubiquitylation mix containing 1.5  $\mu\text{g}$  of REX1 or SMAD7, 0.1  $\mu\text{M}$  UBE1, 0.05  $\mu\text{M}$  UBE2D1, 2  $\mu\text{M}$  Ub-IR<sup>800</sup>, 0.5 mM TCEP [pH 7.5], 5 mM ATP (both from Sigma Aldrich), 50 mM Tris-HCl [pH 7.5], 5 mM MgCl<sub>2</sub> for 30 min at 30°C. Reactions were stopped with SDS sample buffer and boiled for 5 min. Samples were loaded in 4–12% Bis-Tris gradient gels (Thermo Fisher Scientific). Gels were then scanned using an Odyssey CLx Infrared Imaging System (LICOR Biosciences) for detection of fluorescently labelled ubiquitylated proteins. After scanning proteins were transferred to PVDF or nitrocellulose membranes and analysed via immunoblot and signal detected using ECL or infrared detection.

For UBE2D1 ubiquitin discharge assays 5  $\mu\text{g}$  RNF12 protein was phosphorylated as above with 2U SRPK or equivalent  $\mu\text{g}$  of catalytically inactive kinase and 2 mM ATP in kinase buffer for 1 h at 37°C. ATP was depleted with 4.5 U/ml apyrase (New England Biolabs) for 10 min at room temperature. UBE2D1-ubiquitin thioester was prepared by incubating 100  $\mu\text{M}$  UBE2D1 with 0.2  $\mu\text{M}$  UBE1, 100  $\mu\text{M}$  FLAG-ubiquitin, 3 mM ATP, 0.5 mM TCEP [pH 7.5] (both from Sigma Aldrich), 5 mM MgCl<sub>2</sub>, 50 mM Tris (pH 7.5), 150 mM NaCl for 20 min at 37 °C. The reaction was stopped by depleting ATP with 4.5 U/ml apyrase (New England Biolabs) for 10 min at room temperature. Then, 40  $\mu\text{M}$  UBE2D1-ubiquitin were incubated with 1  $\mu\text{M}$  phosphorylated RNF12 and 150 mM L-lysine in a buffer containing 50 mM Tris [pH 7.5], 150 mM NaCl, 0.5 mM TCEP, 0.1% [v/v] NP40 at room temperature. Reactions were stopped with non-reducing SDS loading buffer and analysed via immunoblotting and membranes scanned in an Odyssey CLx Infrared Imaging System (LI-COR Biosciences). Protein signals were quantified using Image Studio software (LI-COR Biosciences). Reaction rates were determined by extrapolating protein signals in a standard curve of known concentrations of UBE2D1-ubiquitin conjugate and plotting concentration over time.

### Binding Assays

For protein immunoprecipitation, protein A or G beads were incubated with 2  $\mu\text{g}$  antibody and 0.5–2  $\mu\text{g}/\mu\text{l}$  protein sample in lysis buffer overnight at 4°C. Immunoprecipitates were then washed three times with lysis buffer supplemented with 500  $\mu\text{M}$  NaCl, resuspended in 50% [v/v] loading buffer and boiled at 95°C for 5 minutes prior to immunoblotting analysis. For HA tagged protein immunoprecipitation, Anti-HA agarose conjugate (Sigma Aldrich) was used.

For GST pulldown assays, 0.5  $\mu\text{g}$  of RNF12 was phosphorylated with 200 mU SRPK (or 19 ng SRPK1 WT or KD; 60 ng SRPK2 WT or KD) in presence of 2 mM ATP in kinase buffer for 1 h at 37°C. ATP was depleted with 4.5 U/ml apyrase (New England Biolabs) for 10 min at room temperature and samples mixed with 0.5  $\mu\text{g}$  REX1 protein in 500  $\mu\text{l}$  GST pulldown buffer (10 mM Tris pH=8.0, 150 mM NaCl, 10% Glycerol, 0.1% Triton X-100, and Roche Complete Protease Inhibitor Cocktail Tablets) overnight at 4°C. Complexes were then pulled down using GSH Sepharose 4B beads (Sigma Aldrich) for 2 h at 4°C. Beads were then washed and samples analysed by immunoblotting.

### RNA-Sequencing and Gene Ontology Analysis

Total RNA was extracted using RNeasy Mini Kit (QIAGEN) and DNA libraries prepared using TruSeq Stranded Total RNA Sample Preparation kits (Illumina) according to manufacturer's instructions. Sequencing was performed on Illumina NextSeq platform. Briefly, raw sequencing reads were trimmed by removing Illumina adapters sequences and low-quality bases. Trimmed reads were mapped using to mouse reference genome (mm10) using STAR software (v2.7.1a) (Dobin et al., 2013). The number of reads per transcript was counted using HTSeq (v0.11.2) (Anders et al., 2015). The differentially expressed genes (DEGs) were estimated using SARTools (v1.6.9) (Varet et al., 2016) and DESeq2 (v1.24) (Love et al., 2014) R packages. Gene Ontology (GO) analysis was carried out using the GOSTats (v2.50.0) R package (Falcon and Gentleman, 2007). Raw and processed data can be accessed at Gene Expression Omnibus, GEO: GSE149554 (<https://www.ncbi.nlm.nih.gov/geo/query/acc.cgi?acc=GSE149554>).

SMART-seq v4 RNA-Sequencing data from single nuclei within the human cortex was previously described (Hodge et al., 2019). Gene expression represented as trimmed average counts per million (average expression of the middle 50% of the data from log<sub>2</sub> (CPM (exons+introns) per gene) was obtained from the Allen Brain Atlas (<https://portal.brain-map.org/atlas-and-data/rnaseq>).

### RNA Extraction and Quantitative RT-PCR

Total RNA extraction and reverse transcription was performed as described. Quantitative PCR reactions using SsoFast EvaGreen Supermix (Bio-Rad) were performed in a CFX384 real time PCR system (Bio-Rad). Relative RNA expression was calculated through the  $\Delta\Delta\text{Ct}$  method and normalised to *Gapdh* expression. Data was analysed in Excel (Microsoft) and statistical analysis performed in GraphPad Prism v7.0c software (GraphPad Software Inc.). Primer sequences are listed in the Table S8.

### QUANTIFICATION AND STATISTICAL ANALYSIS

Data is presented as mean  $\pm$  standard error of the mean (S.E.M) of at least three biological replicates unless otherwise indicated. Statistical significance was estimated using ANOVA followed by Tukey's post hoc test or t-student's test. Significance was defined as  $p < 0.05$ . Statistical details for individual experiments can be found in the figure legends.

**Developmental Cell, Volume 55**

**Supplemental Information**

**Functional Diversification of SRSF Protein**

**Kinase to Control Ubiquitin-Dependent**

**Neurodevelopmental Signaling**

**Francisco Bustos, Anna Segarra-Fas, Gino Nardocci, Andrew Cassidy, Odetta Antico, Lindsay Davidson, Lennart Brandenburg, Thomas J. Macartney, Rachel Toth, C. James Hastie, Jennifer Moran, Robert Gourlay, Joby Varghese, Renata F. Soares, Martin Montecino, and Greg M. Findlay**



Figure S2

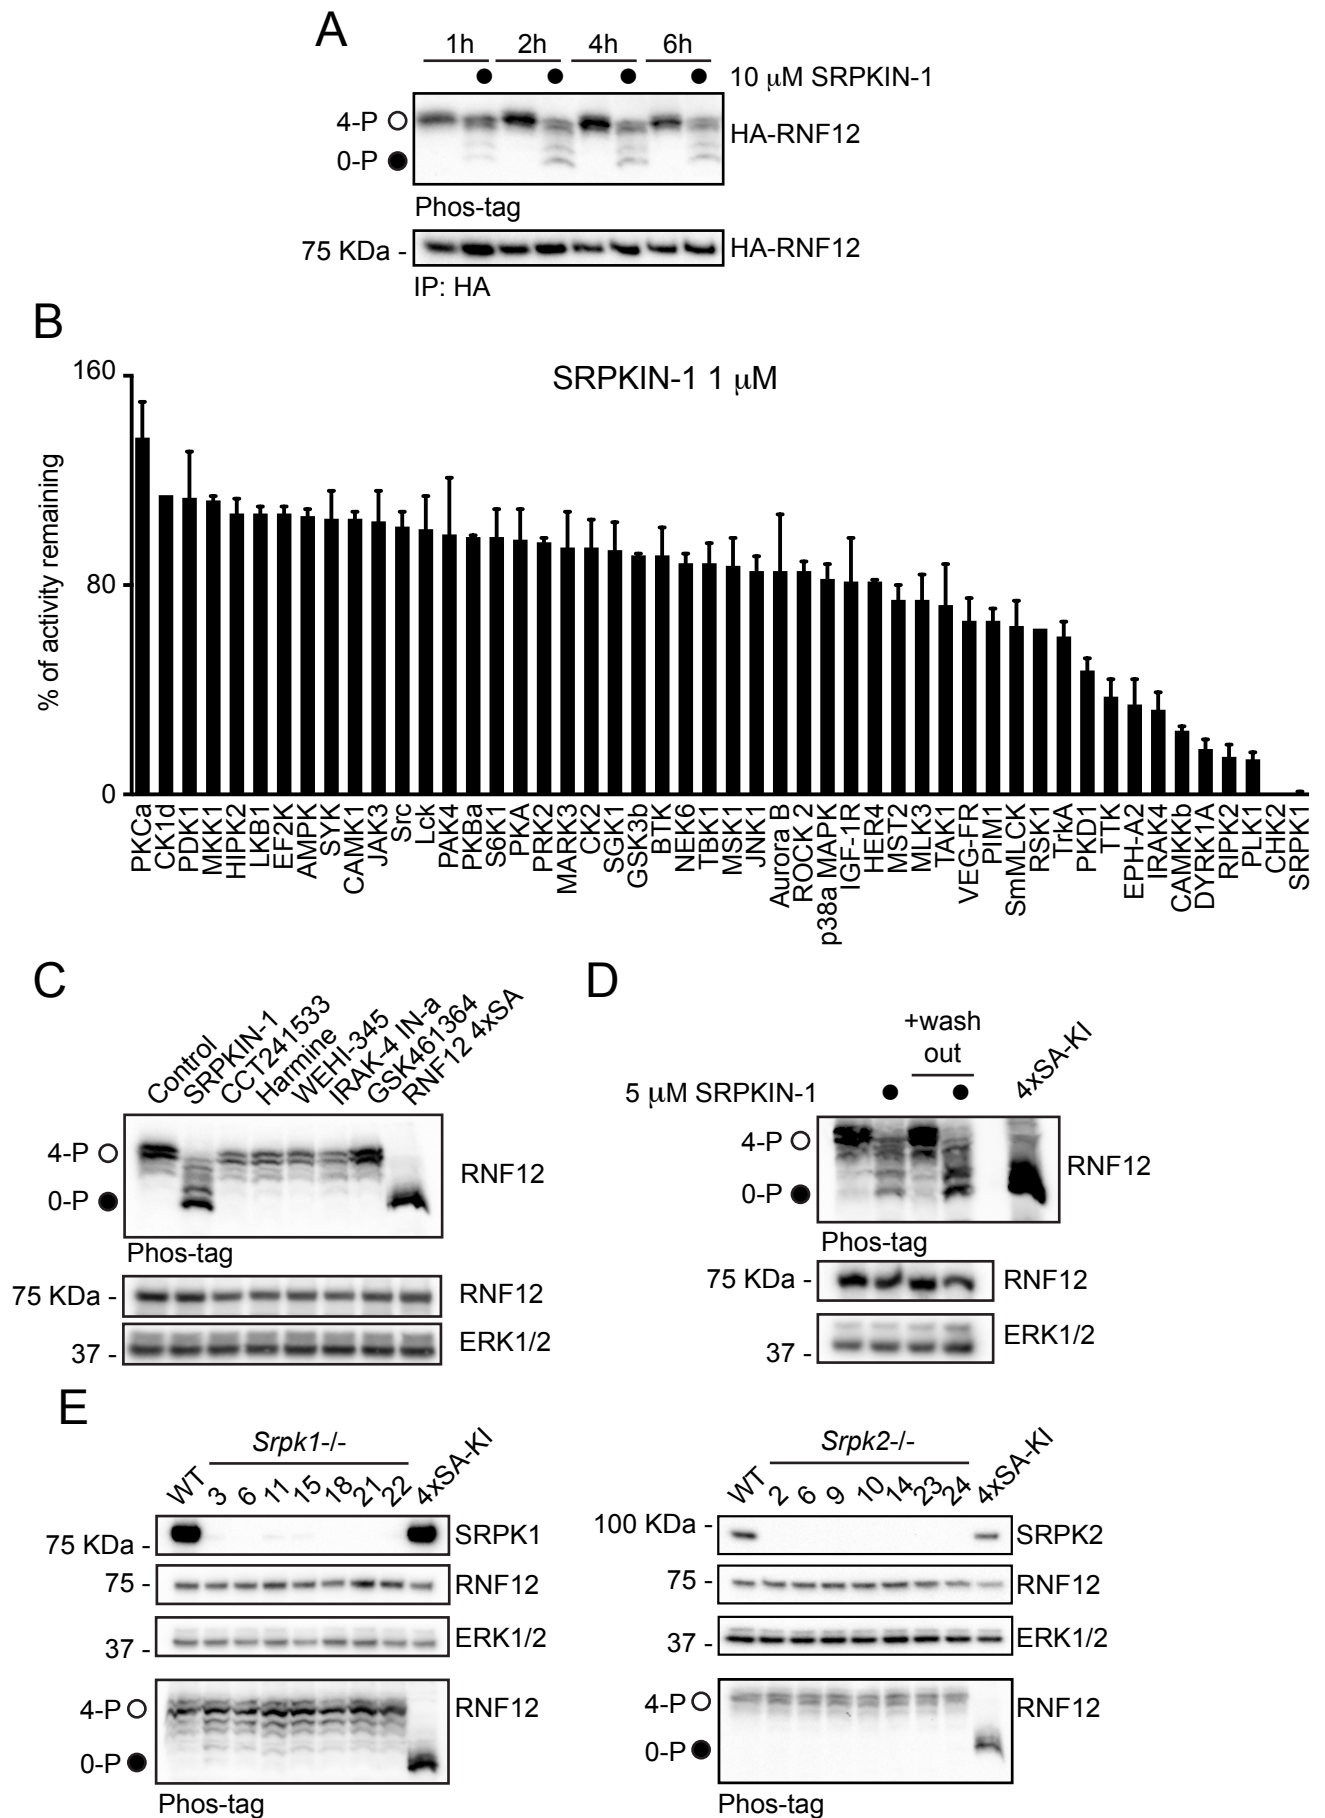

Figure S3

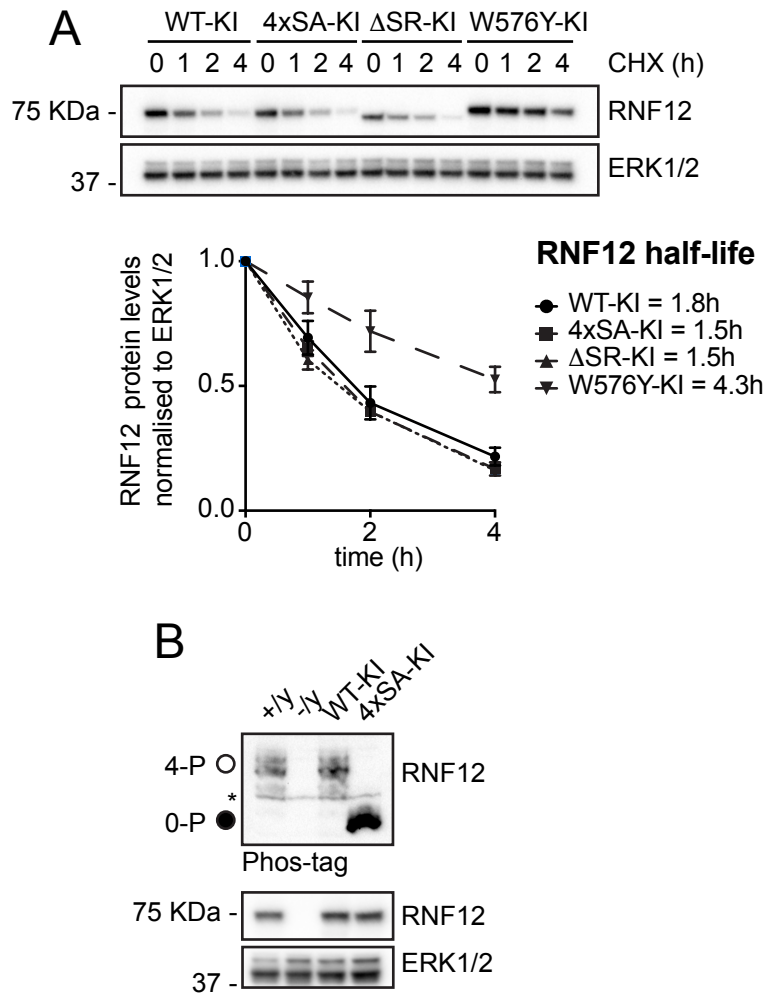

Figure S4

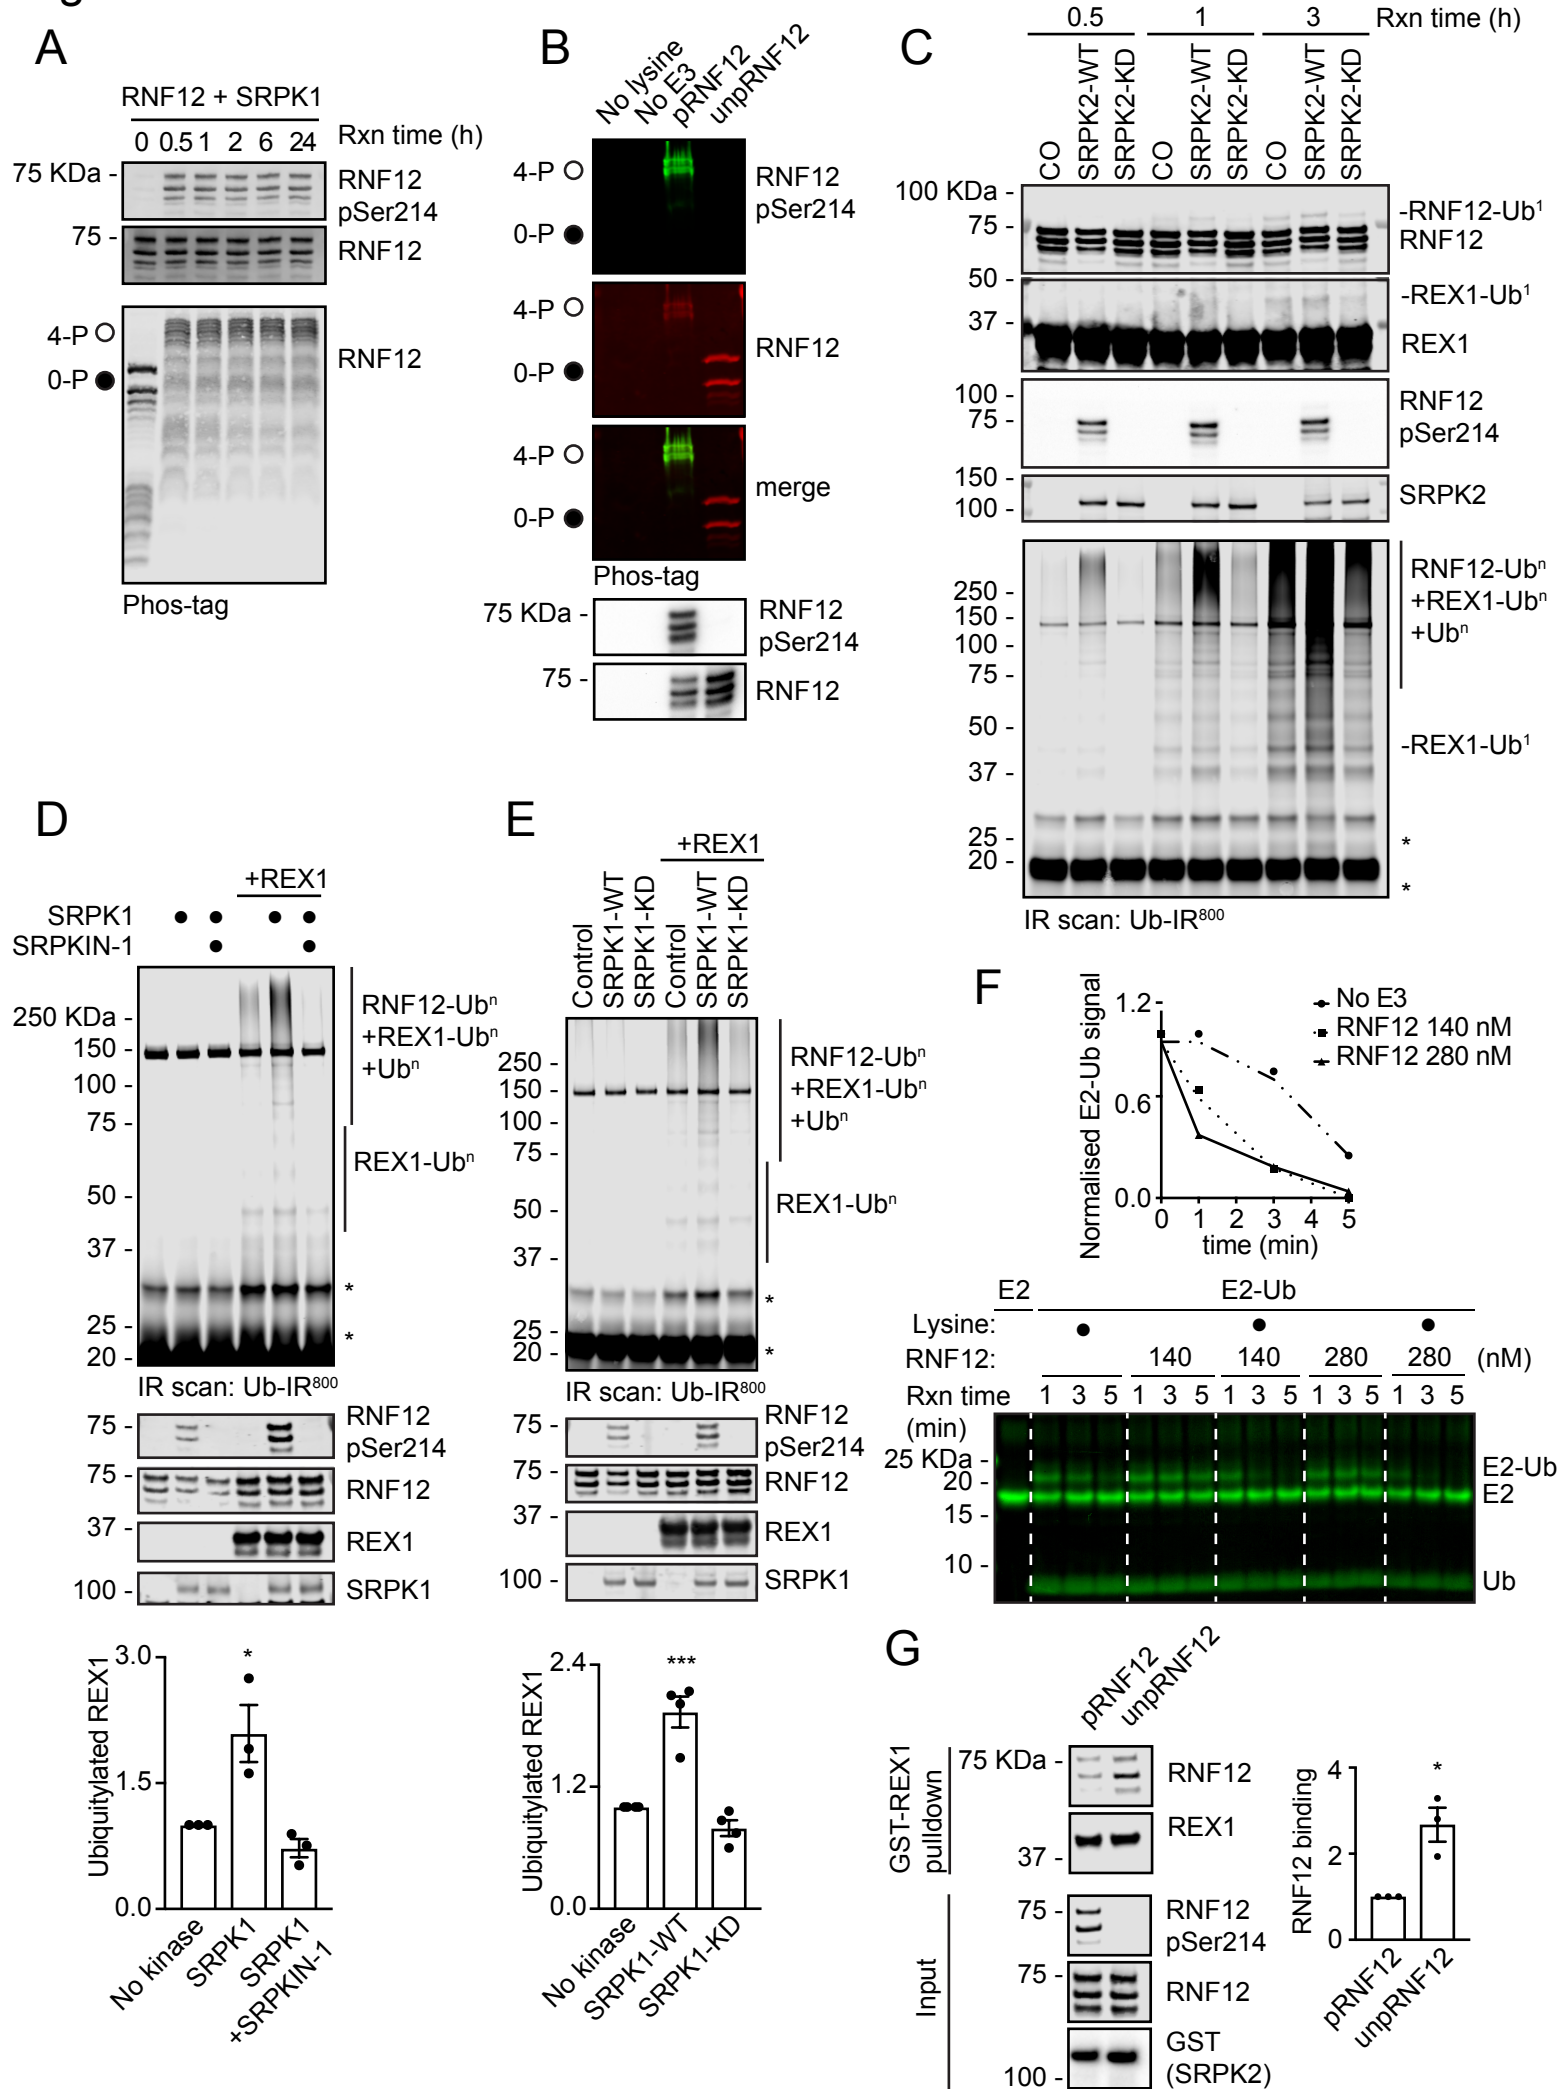



Figure S5

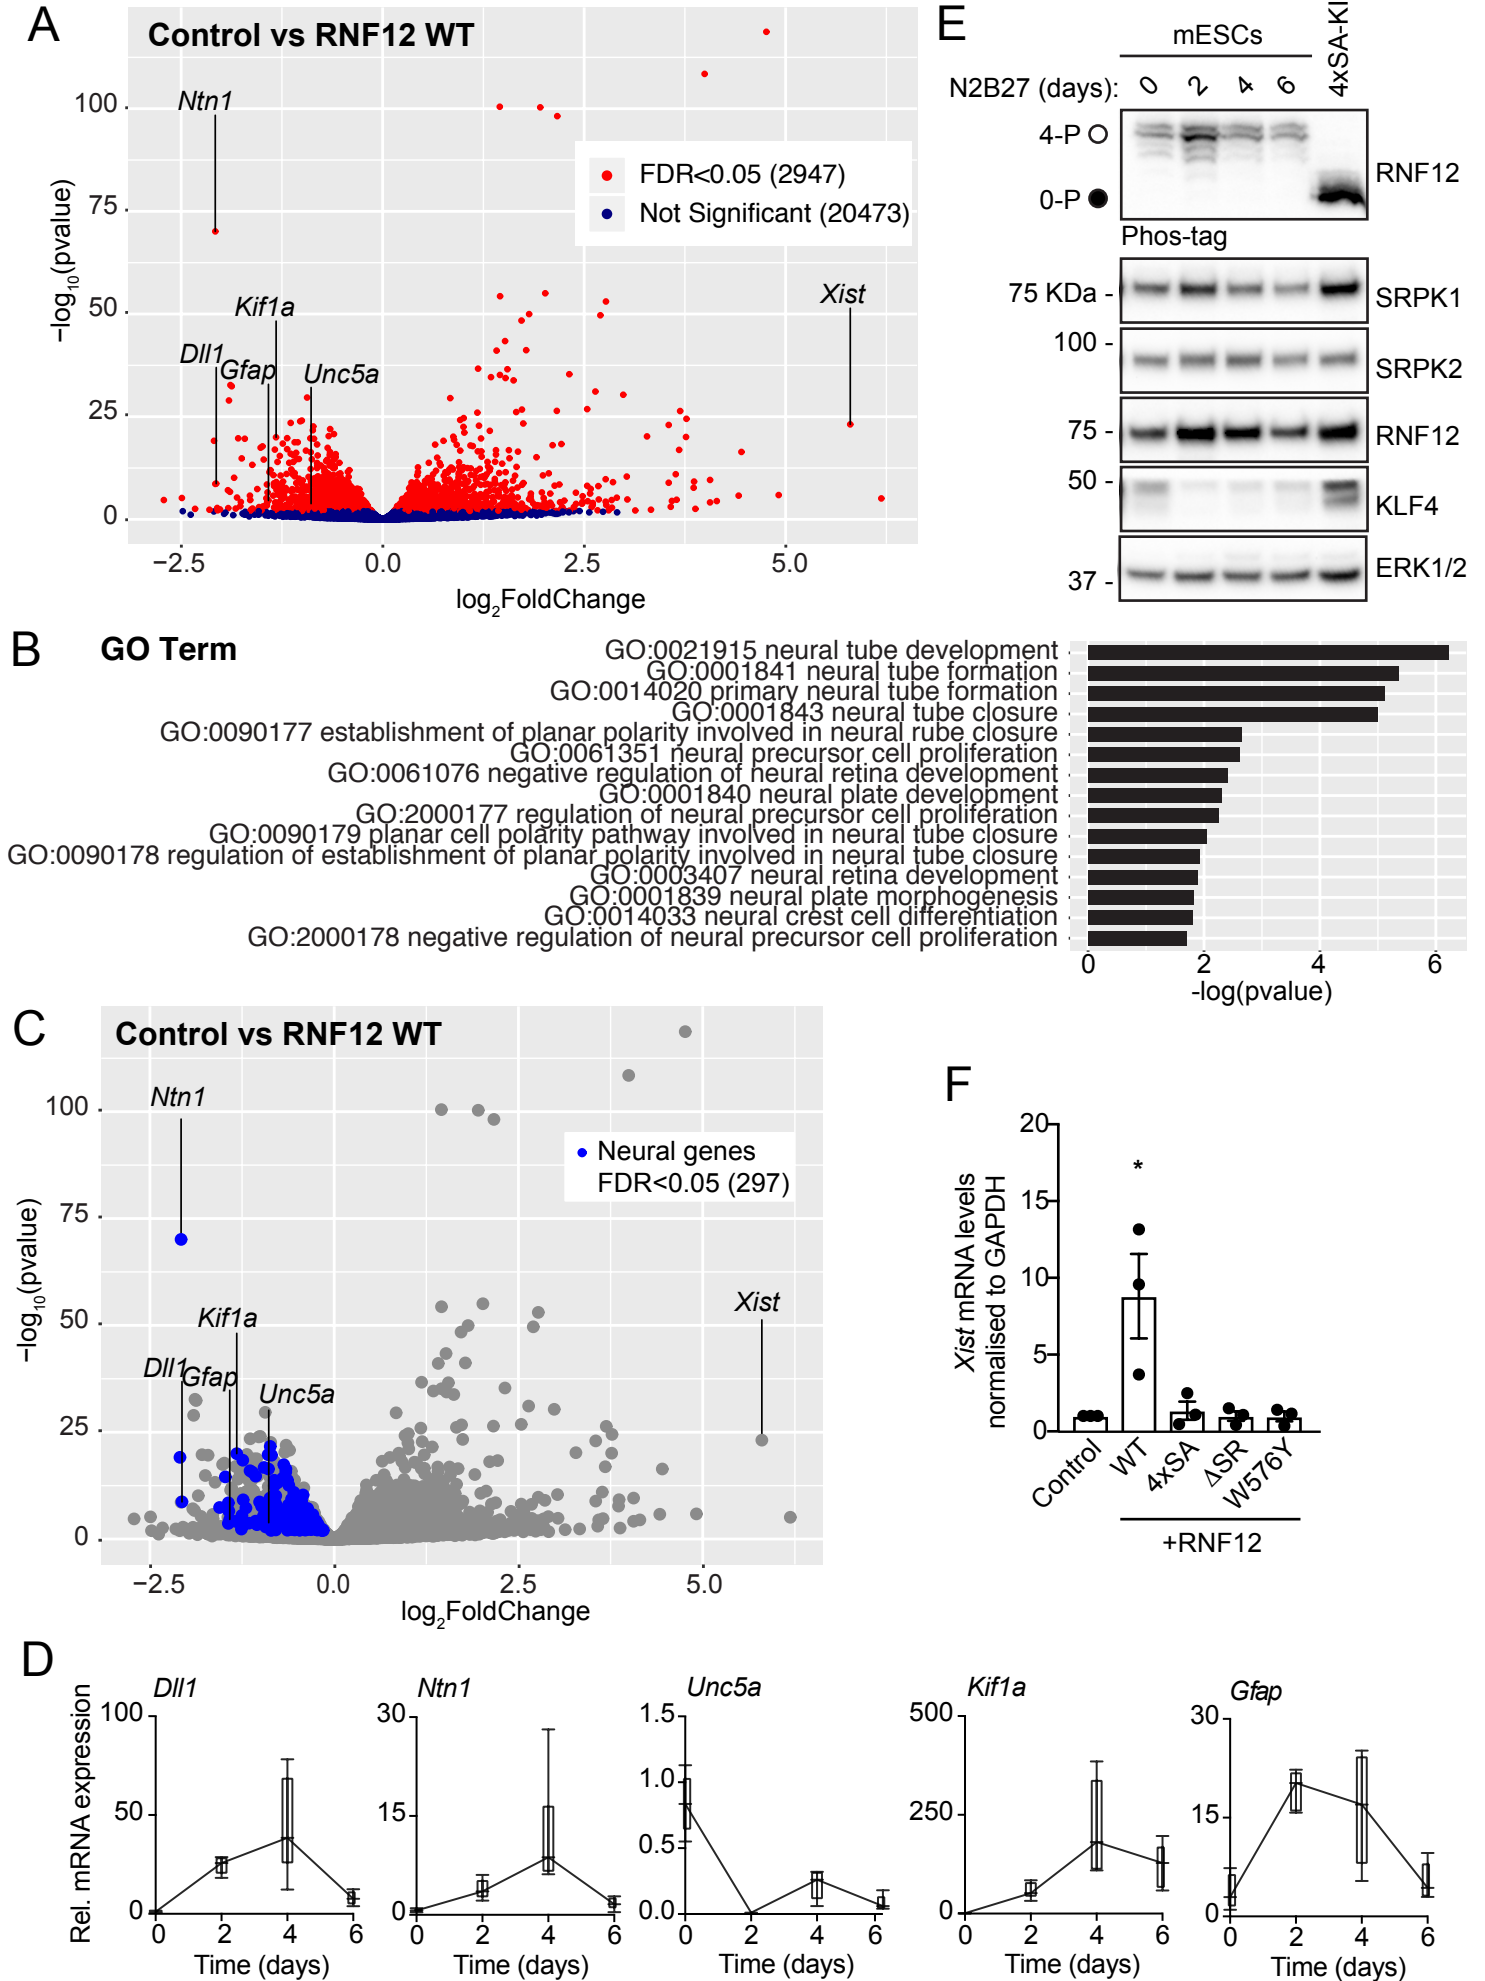

Figure S6

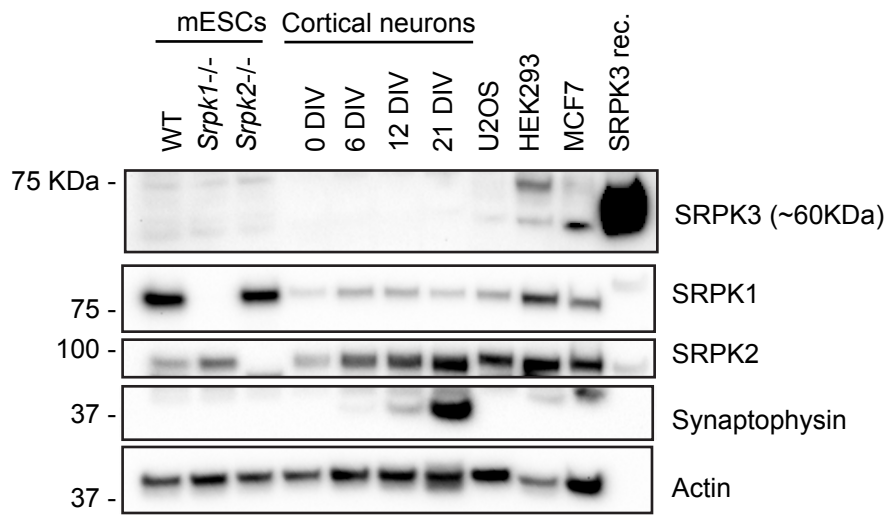

## Supplemental Figure Legends

**Figure S1. Differential inhibitor sensitivities and expression profiles of SRPK kinases (Related to Figure 1).** (A) Wild-type (WT) mESCs were analysed for protein copy number by absolute quantitative proteomics. SRPK1, SRPK2 and SRPK3 protein copy numbers are shown. Data are represented as mean  $\pm$  S.E.M. (n=3). Unpaired Student's t test, two-sided, confidence level 95%. (\*\*\*\*)  $P < 0.0001$ . ND = not detected. (B) Inhibition of RNF12 phosphorylation *in vitro* by SRPK1 and SRPK2 in the presence of varying concentrations of the indicated SRPK inhibitors was determined by immunoblotting for RNF12 phospho-Ser214 (Left). RNF12 levels are shown as a control. Immunoblots were quantified to generate SRPK inhibitor dose-response curves for inhibition of RNF12 phosphorylation by SRPK1 and SRPK2 *in vitro* (Right). (C) WT, *Srpk1*<sup>-/-</sup> and *Srpk2*<sup>-/-</sup> mESCs were cultured and SRPK protein expression was analysed via immunoblotting. Heart, spleen and skeletal muscle tissue lysates and SRPK3 recombinant protein are shown as positive controls for SRPK3 expression.

**Figure S2. SRPK1/2 phosphorylate RNF12 SR-motif in mESCs (Related to Figure 2).** (A) HA-RNF12 expressing *Rlim*<sup>-/-</sup> mESCs were treated with 10  $\mu$ M SRPKIN-1 for the indicated times and SR-motif phosphorylation of HA-immunoprecipitated RNF12 analysed by phos-tag immunoblotting. HA-RNF12 levels are shown as a control. Fully phosphorylated (4-P) and unphosphorylated (0-P) RNF12 SR-motif is indicated by open ( $\circ$ ) and closed ( $\bullet$ ) circles respectively. (B) SRPKIN-1 inhibition of 50 kinases was profiled *in vitro* (MRC-PPU International Centre for Kinase Profiling). Data are represented as mean  $\pm$  S.D. (n=3). (C) RNF12 expressing mESCs were treated with 10  $\mu$ M of the following inhibitors: SRPKIN-1 (SRPK inhibitor), CCT-241533 (CHK2 inhibitor), Harmine (DYRK1A inhibitor), WEHI-345 (RIPK2 inhibitor), IRAK-4-Inhibitor-a (IRAK4 inhibitor) and GSK-461364 (PLK1/2 inhibitor) for 4 h, and RNF12 phosphorylation analysed via phos-tag immunoblotting. HA-RNF12 and ERK1/2 levels are shown as a control. (D) RNF12 expressing mESCs were pre-treated with 5  $\mu$ M SRPKIN-1 for 3 h, media changed and cells cultured for further 5 h (+ wash-out). RNF12 phosphorylation was analysed via phos-tag immunoblotting. ERK1/2 levels are shown as a loading control. (E) Multiple *Srpk1*<sup>-/-</sup> and *Srpk2*<sup>-/-</sup> mESC clones were

analysed for RNF12 phosphorylation via phos-tag immunoblotting. SRPK, RNF12 and ERK1/2 levels are shown as controls.

**Figure S3. RNF12 protein stability is unaffected by SR-motif phosphorylation (Related to Figure 3).** (A) The indicated RNF12 knock-in mESC lines were treated with 350  $\mu$ M cycloheximide for the indicated times and analysed for RNF12 levels via immunoblotting. ERK1/2 levels are shown as loading control (Top). Quantification of RNF12 signal intensity and determination of protein half-life via immunoblotting and non-linear curve fitting (Bottom). Data are represented as mean  $\pm$  S.E.M. (n=3) (B) Phos-tag immunoblot analysis of RNF12 SR-motif phosphorylation in the indicated mESC lines. RNF12 and ERK1/2 levels are shown as controls. Fully phosphorylated (4-P) and unphosphorylated (0-P) RNF12 SR-motif is indicated by open ( $\circ$ ) and closed ( $\bullet$ ) circles respectively. (\*) Indicates non-specific signal.

**Figure S4. SRPK-mediated RNF12 SR-motif phosphorylation stimulates RNF12 E3 ubiquitin ligase activity (Related to Figure 4).** (A) Time course of RNF12 phosphorylation by SRPK1 *in vitro*, analysed for SR-motif phosphorylation via RNF12 phospho-Ser214 infrared and phos-tag immunoblotting. Fully phosphorylated (4-P) and unphosphorylated (0-P) RNF12 SR-motif is indicated with open ( $\circ$ ) and closed ( $\bullet$ ) circles respectively. RNF12 levels are shown as a control. (B) RNF12 phosphorylation by SRPK2 for 1 h *in vitro* was analysed via multiplex infrared Phos-tag and regular immunoblotting. This material is representative of samples used in E2 ubiquitin discharge assays displayed in Figure 4D. (C) Recombinant RNF12 was incubated with wild-type (WT) or kinase dead (KD) SRPK2 and subjected to REX1 ubiquitylation assays for the indicated reaction times. RNF12, REX1 RNF12 phospho-Ser214 and SRPK2 expression were determined by immunoblotting. Infrared scans of ubiquitylated substrate signal are shown. Monoubiquitylated RNF12 and REX1 signals are indicated as RNF12-Ub<sup>1</sup> and REX1-Ub<sup>1</sup> respectively. (D) Recombinant RNF12 was incubated with SRPK1 in absence or presence of SRPKIN-1 and subjected to REX1 fluorescent ubiquitylation assays. Infrared scans of ubiquitylated substrate signal, and phospho-Ser214 and total RNF12, REX1 and SRPK1 control infrared immunoblots are shown (Top) with graphical quantification (Bottom). Data are represented as mean  $\pm$  S.E.M. (n=3).

One-way ANOVA followed by Tukey's multiple comparisons test; confidence level 95%. (\*) P=0.0221 (n=3). (E) Recombinant RNF12 was incubated with WT or KD SRPK1 and subjected to REX1 fluorescent ubiquitylation assays. Infrared scans of ubiquitylated substrate signal, and phospho-Ser214 and total RNF12, REX1 and SRPK1 control infrared immunoblots are shown (Top) with graphical quantification (Bottom). Data are represented as mean  $\pm$  S.E.M. (n=3). One-way ANOVA followed by Tukey's multiple comparisons test; confidence level 95%. (\*\*\*) P=0.0002 (n=3). (F) The indicated concentration of recombinant RNF12 was assayed for UBE2D1 E2 ubiquitin discharge assay for the indicated reaction times. Normalised E2-ubiquitin conjugate signal quantification (Top) and infrared Coomassie gel staining scans (Bottom) are shown. (G) Recombinant RNF12 was incubated with WT or KD SRPK2 and then subjected to a GST-REX1 pulldown assay. Infrared immunoblots (Left) and RNF12-REX1 binding quantification are shown (Right). Data are represented as mean  $\pm$  S.E.M. (n=3). Unpaired Student's t test, two-sided, confidence level 95%. (\*) P= 0.0133.

**Figure S5. RNF12 negatively regulates neurodevelopmental gene expression in mESCs (Related to Figure 5).** (A) Volcano plot of RNA-SEQ comparing RNA expression of *Rlim*<sup>-/-</sup> mESCs transfected with control or WT RNF12. RNAs that are significantly altered by RNF12 are displayed in red (2947 genes). Key neurodevelopmental mRNAs that are inhibited by RNF12 E3 ubiquitin ligase activity are labelled (*Dll1*, *Ntn1*, *Gfap*, *Kif1a*, *Unc5a*). *Xist* is a known target of RNF12 activity. FDR = False discovery rate. (B) Gene Ontology analysis of RNF12 responsive genes identifies significant enrichment of genes related to neural development (65 genes). (C) Volcano plot of RNA-SEQ comparing RNA expression of *Rlim*<sup>-/-</sup> mESCs transfected with control or WT RNF12. Neuronal/neural genes negatively regulated by RNF12 identified via Gene Ontology are highlighted in blue (297 genes). (D) Selected neurodevelopmental mRNA expression was analysed by quantitative RT-PCR following mESC neural differentiation in N2B27 media for the indicated times. Data is represented in Box-and-whisker plots showing median, first and third quartiles, and maximum and minimum values (n=6). (E) mESCs were induced to undergo neural differentiation in N2B27 media for the indicated times, and RNF12 SR-motif phosphorylation was analysed by phos-tag immunoblotting. Fully phosphorylated (4-P) and unphosphorylated (0-P)

RNF12 SR-motif is indicated by open (○) and closed (●) circles respectively. SRPK1, SRPK2, RNF12, KLF4 and ERK1/2 levels were analysed by immunoblotting. KLF4 is shown as a pluripotency marker and ERK1/2 as a loading control. (F) mESCs were transfected with the indicated vectors and cultured for 72 h prior analysis of *Xist* RNA expression via quantitative RT-PCR. Data is represented as mean ± S.E.M. (n=3). One-way ANOVA followed by Tukey's multiple comparisons test; confidence level 95%. (\*) P=0.0292.

**Figure S6. SRPK1/2 are the major isoforms expressed in cultured mouse cortical neurons (Related to Figure 7).** Primary cortical neurons isolated from E16.5 C57BL6 mice were cultured for the indicated number of days *in vitro* (DIV) and SRPK1, SRPK2, SRPK3, synaptophysin and actin expression analysed via immunoblotting alongside the indicated mESC lines. U2OS, HEK293, MCF7 and recombinant SRPK3 were used as positive controls for SRPK3 expression, synaptophysin as a neuronal maturation marker and actin as a loading control.

## Supplemental Tables

**Table S1 (Related to Figure 1).** RSRS repeat-containing proteins functionally grouped

| <b>mRNA splicing</b> | <b>Other</b> |
|----------------------|--------------|
| Rbmx2                | Rbbp6        |
| Ccn1                 | Ndrp1        |
| Srsf2                | Rbm26        |
| Luc713               | Ppargc1a     |
| Clk2                 | Paf1         |
| Prpf38a              | Arglu1       |
| Arl6ip4              | Scaf8        |
| Sfswap               | Pdzd7        |
| Rsrc1                | Srrm3        |
| Cwc25                | Nktr         |
| Rbm39                | Pprc1        |
| Srsf12               | Snrnp70      |
| Scaf4                | Rlim         |
| Srek1                | Cherp        |
| Pnn                  | Lbr          |
| Clasrp               | Nkap         |
| Tra2b                | Topors       |
| Srsf5                | Rsrc2        |
| Thrap3               | Rsrp1        |
| Cactin               | Syt15        |
| Srm1                 | Erbp3        |
| Scaf1                | Bclaf1       |
| Srsf7                | Gpatch8      |
| Acin1                | Zc3h18       |
| Srsf6                | Luc71        |
| Znf638               | Spata18      |
| Prpf38b              | Gtppb4       |
| Ddx46                | Tjp2         |
| Srrm2                | Luc712       |
| Srsf4                |              |
| Son                  |              |
| Srsf1                |              |
| U2af2                |              |
| U2af1                |              |
| Ppig                 |              |
| Tra2a                |              |
| Ccnl2                |              |
| Setd2                |              |
| Cir1                 |              |
| Srsf3                |              |
| Dhx8                 |              |
| Rnps1                |              |
| Pnir                 |              |
| Cdk13                |              |
| Snrnp27              |              |
| Srsf10               |              |
| Zranb2               |              |
| Prpf4b               |              |

**Table S2 (Related to Figure 1).** Functional categorisation of RSRs repeat-containing proteins identified by ScanProsite

| Entry  | Gene names (primary) | Protein names                                                                                                                                                                                                                       | Function [CC]                                                                                                                                                                                                                                                                                                                                                                                                                                                                                                                                                                                                                                                                                                                                                                                                                                                                                                                                                                                                                                                                                                                                                                                                                                                                                                                                               |
|--------|----------------------|-------------------------------------------------------------------------------------------------------------------------------------------------------------------------------------------------------------------------------------|-------------------------------------------------------------------------------------------------------------------------------------------------------------------------------------------------------------------------------------------------------------------------------------------------------------------------------------------------------------------------------------------------------------------------------------------------------------------------------------------------------------------------------------------------------------------------------------------------------------------------------------------------------------------------------------------------------------------------------------------------------------------------------------------------------------------------------------------------------------------------------------------------------------------------------------------------------------------------------------------------------------------------------------------------------------------------------------------------------------------------------------------------------------------------------------------------------------------------------------------------------------------------------------------------------------------------------------------------------------|
| Q8R0F5 | Rbmx2                | RNA-binding motif protein, X-linked 2                                                                                                                                                                                               | FUNCTION: Involved in pre-mRNA splicing as component of the activated spliceosome.                                                                                                                                                                                                                                                                                                                                                                                                                                                                                                                                                                                                                                                                                                                                                                                                                                                                                                                                                                                                                                                                                                                                                                                                                                                                          |
| Q52KE7 | Ccnl1                | Cyclin-L1 (Cyclin-L) (Cyclin Ania-6a)                                                                                                                                                                                               | FUNCTION: Involved in pre-mRNA splicing. Functions in association with cyclin-dependent kinases (CDKs). May play a role in the regulation of RNA polymerase II (pol II). Inhibited by the CDK-specific inhibitor CDKN1A/p21.                                                                                                                                                                                                                                                                                                                                                                                                                                                                                                                                                                                                                                                                                                                                                                                                                                                                                                                                                                                                                                                                                                                                |
| P97868 | Rbbp6                | E3 ubiquitin-protein ligase RBBP6 (EC 2.3.2.27) (Proliferation potential-related protein) (Protein P2P-R) (RING-type E3 ubiquitin transferase RBBP6) (Retinoblastoma-binding protein 6) (p53-associated cellular protein of testis) | FUNCTION: E3 ubiquitin-protein ligase which promotes ubiquitination of YBX1, leading to its degradation by the proteasome (By similarity). May play a role as a scaffold protein to promote the assembly of the p53/TP53-MDM2 complex, resulting in increase of MDM2-mediated ubiquitination and degradation of p53/TP53; may function as negative regulator of p53/TP53, leading to both apoptosis and cell growth retardation (PubMed:17470788). Regulates DNA-replication and common fragile sites (CFS) stability in a ZBTB38- and MCM10-dependent manner. Controls ZBTB38 protein stability and abundance via ubiquitination and proteasomal degradation, and ZBTB38 in turn negatively regulates the expression of MCM10 which plays an important role in DNA-replication (PubMed:24726359).                                                                                                                                                                                                                                                                                                                                                                                                                                                                                                                                                          |
| Q62433 | Ndrp1                | Protein NDRG1 (N-myc downstream-regulated gene 1 protein) (Protein Ndr1)                                                                                                                                                            | FUNCTION: Stress-responsive protein involved in hormone responses, cell growth, and differentiation. Acts as a tumor suppressor in many cell types. Necessary but not sufficient for p53/TP53-mediated caspase activation and apoptosis. Required for vesicular recycling of CDH1 and TF. May also function in lipid trafficking. Protects cells from spindle disruption damage. Functions in p53/TP53-dependent mitotic spindle checkpoint. Regulates microtubule dynamics and maintains euploidy (By similarity). Has a role in cell trafficking notably of the Schwann cell and is necessary for the maintenance and development of the peripheral nerve myelin sheath.                                                                                                                                                                                                                                                                                                                                                                                                                                                                                                                                                                                                                                                                                  |
| Q6NZN0 | Rbm26                | RNA-binding protein 26 (Protein expressed in male leptotene and zygotene spermatocytes 393) (MLZ-393) (RNA-binding motif protein 26)                                                                                                |                                                                                                                                                                                                                                                                                                                                                                                                                                                                                                                                                                                                                                                                                                                                                                                                                                                                                                                                                                                                                                                                                                                                                                                                                                                                                                                                                             |
| O70343 | Ppargc1a             | Peroxisome proliferator-activated receptor gamma coactivator 1-alpha (PGC-1alpha) (PPAR-gamma coactivator 1-alpha) (PPARGC-1-alpha)                                                                                                 | FUNCTION: Transcriptional coactivator for steroid receptors and nuclear receptors. Greatly increases the transcriptional activity of PPARG and thyroid hormone receptor on the uncoupling protein promoter. Can regulate key mitochondrial genes that contribute to the program of adaptive thermogenesis. Plays an essential role in metabolic reprogramming in response to dietary availability through coordination of the expression of a wide array of genes involved in glucose and fatty acid metabolism. Induces the expression of PERM1 in the skeletal muscle in an ESRRA-dependent manner. Also involved in the integration of the circadian rhythms and energy metabolism. Required for oscillatory expression of clock genes, such as ARNTL/BMAL1 and NR1D1, through the coactivation of RORA and RORC, and metabolic genes, such as PDK4 and PEPCk. Isoform 4 specifically activates the expression of IGF1 and suppresses myostatin expression in skeletal muscle leading to muscle fiber hypertrophy.                                                                                                                                                                                                                                                                                                                                       |
| Q8K2T8 | Paf1                 | RNA polymerase II-associated factor 1 homolog                                                                                                                                                                                       | FUNCTION: Component of the PAF1 complex (PAF1C) which has multiple functions during transcription by RNA polymerase II and is implicated in regulation of development and maintenance of embryonic stem cell pluripotency. PAF1C associates with RNA polymerase II through interaction with POLR2A CTD non-phosphorylated and 'Ser-2'- and 'Ser-5'-phosphorylated forms and is involved in transcriptional elongation, acting both independently and synergistically with TCEA1 and in cooperation with the DSIF complex and HTATSF1. PAF1C is required for transcription of Hox and Wnt target genes. PAF1C is involved in hematopoiesis and stimulates transcriptional activity of KMT2A/MLL1. PAF1C is involved in histone modifications such as ubiquitination of histone H2B and methylation on histone H3 'Lys-4' (H3K4me3). PAF1C recruits the RNF20/40 E3 ubiquitin-protein ligase complex and the E2 enzyme UBE2A or UBE2B to chromatin which mediate monoubiquitination of 'Lys-120' of histone H2B (H2BK120ub1); UB2A/B-mediated H2B ubiquitination is proposed to be coupled to transcription. PAF1C is involved in mRNA 3' end formation probably through association with cleavage and poly(A) factors. Connects PAF1C with the RNF20/40 E3 ubiquitin-protein ligase complex. Involved in polyadenylation of mRNA precursors (By similarity). |
| Q62093 | Srsf2                | Serine/arginine-rich splicing factor 2 (Protein PR264) (Putative myelin regulatory factor 1) (MRF-1) (Splicing component, 35 kDa) (Splicing factor SC35) (SC-35) (Splicing factor, arginine/serine-rich 2)                          | FUNCTION: Necessary for the splicing of pre-mRNA. It is required for formation of the earliest ATP-dependent splicing complex and interacts with spliceosomal components bound to both the 5'- and 3'-splice sites during spliceosome assembly. It also is required for ATP-dependent interactions of both U1 and U2 snRNPs with pre-mRNA (By similarity). Can bind to the myelin basic protein (MBP) gene MB3 regulatory region and increase transcription of the mbp promoter in cells derived from the CNS. The phosphorylated form (by SRPK2) is required for cellular apoptosis in response to cisplatin treatment (By similarity).                                                                                                                                                                                                                                                                                                                                                                                                                                                                                                                                                                                                                                                                                                                    |
| Q5SUF2 | Luc7l3               | Luc7-like protein 3 (Cisplatin resistance-associated-overexpressed protein)                                                                                                                                                         | FUNCTION: Binds cAMP regulatory element DNA sequence. May play a role in RNA splicing (By similarity).                                                                                                                                                                                                                                                                                                                                                                                                                                                                                                                                                                                                                                                                                                                                                                                                                                                                                                                                                                                                                                                                                                                                                                                                                                                      |
| Q3UL36 | Arglu1               | Arginine and glutamate-rich protein 1                                                                                                                                                                                               |                                                                                                                                                                                                                                                                                                                                                                                                                                                                                                                                                                                                                                                                                                                                                                                                                                                                                                                                                                                                                                                                                                                                                                                                                                                                                                                                                             |
| O35491 | Clk2                 | Dual specificity protein kinase CLK2 (EC 2.7.12.1) (CDC-like kinase 2)                                                                                                                                                              | FUNCTION: Dual specificity kinase acting on both serine/threonine and tyrosine-containing substrates. Phosphorylates serine- and arginine-rich (SR) proteins of the spliceosome complex. May be a constituent of a network of regulatory mechanisms that enable SR proteins to control RNA splicing and can cause redistribution of SR proteins from speckles to a diffuse nucleoplasmic distribution. Acts as a suppressor of hepatic gluconeogenesis and glucose output by repressing PPARGC1A transcriptional activity on gluconeogenic genes via its phosphorylation. Phosphorylates PPP2R5B thereby stimulating the assembly of PP2A phosphatase with the PPP2R5B-AKT1 complex leading to dephosphorylation of AKT1. Phosphorylates: PTPN1, SRSF1 and SRSF3. Regulates the alternative splicing of tissue factor (F3) pre-mRNA in endothelial cells. Phosphorylates PAGE4 at several serine and threonine residues and this phosphorylation attenuates the ability of PAGE4 to potentiate the transcriptional activator activity of JUN (By similarity).                                                                                                                                                                                                                                                                                               |
| Q6DID3 | Scaf8                | SR-related and CTD-associated factor 8 (RNA-binding motif protein 16)                                                                                                                                                               | FUNCTION: Anti-terminator protein required to prevent early mRNA termination during transcription. Together with SCAF4, acts by suppressing the use of early, alternative poly(A) sites, thereby preventing the accumulation of non-functional truncated proteins. Mechanistically, associates with the phosphorylated C-terminal heptapeptide repeat domain (CTD) of the largest RNA polymerase II subunit (POLR2A), and subsequently binds nascent RNA upstream of early polyadenylation sites to prevent premature mRNA transcript cleavage and polyadenylation. Independently of SCAF4, also acts as a positive regulator of transcript elongation.                                                                                                                                                                                                                                                                                                                                                                                                                                                                                                                                                                                                                                                                                                     |
| E9Q9W7 | Pdzd7                | PDZ domain-containing protein 7                                                                                                                                                                                                     | FUNCTION: In cochlear developing hair cells, essential in organizing the USH2 complex at stereocilia ankle links (PubMed:24334608). Blocks inhibition of adenylate cyclase activity mediated by ADGRV1 (PubMed:24962568).                                                                                                                                                                                                                                                                                                                                                                                                                                                                                                                                                                                                                                                                                                                                                                                                                                                                                                                                                                                                                                                                                                                                   |
| Q80WV7 | Srm3                 | Serine/arginine repetitive matrix protein 3                                                                                                                                                                                         | FUNCTION: May play a role in regulating breast cancer cell invasiveness. May be involved in RYBP-mediated breast cancer progression.                                                                                                                                                                                                                                                                                                                                                                                                                                                                                                                                                                                                                                                                                                                                                                                                                                                                                                                                                                                                                                                                                                                                                                                                                        |
| P30415 | Nktr                 | NK-tumor recognition protein (NK-TR protein) (Natural-killer cells cytophilin-related protein) (Peptidyl-prolyl cis-trans isomerase NKTR) (PPIase) (EC 5.2.1.8)                                                                     | FUNCTION: PPIase that catalyzes the cis-trans isomerization of proline imidic peptide bonds in oligopeptides and may therefore assist protein folding. Component of a putative tumor-recognition complex involved in the function of NK cells.                                                                                                                                                                                                                                                                                                                                                                                                                                                                                                                                                                                                                                                                                                                                                                                                                                                                                                                                                                                                                                                                                                              |
| Q4FK66 | Prp38a               | Pre-mRNA-splicing factor 38A                                                                                                                                                                                                        | FUNCTION: Involved in pre-mRNA splicing as a component of the spliceosome.                                                                                                                                                                                                                                                                                                                                                                                                                                                                                                                                                                                                                                                                                                                                                                                                                                                                                                                                                                                                                                                                                                                                                                                                                                                                                  |
| Q9JM93 | Arl6ip4              | ADP-ribosylation factor-like protein 6-interacting protein 4 (ARL-6-interacting protein 4) (Aip-4) (Splicing factor SRp37)                                                                                                          | FUNCTION: Involved in modulating alternative pre-mRNA splicing with either 5' distal site activation or preferential use of 3' proximal site.                                                                                                                                                                                                                                                                                                                                                                                                                                                                                                                                                                                                                                                                                                                                                                                                                                                                                                                                                                                                                                                                                                                                                                                                               |
| Q3USH5 | Sfswap               | Splicing factor, suppressor of white-apricot homolog (Splicing factor, arginine/serine-rich 8) (Suppressor of white apricot protein homolog)                                                                                        | FUNCTION: Plays a role as an alternative splicing regulator. Regulates its own expression at the level of RNA processing. Also regulates the splicing of fibronectin and CD45 genes. May act, at least in part, by interaction with other R/S-containing splicing factors. Represses the splicing of MAPT/Tau exon 10 (By similarity).                                                                                                                                                                                                                                                                                                                                                                                                                                                                                                                                                                                                                                                                                                                                                                                                                                                                                                                                                                                                                      |
| Q6NZN1 | Pprc1                | Peroxisome proliferator-activated receptor gamma coactivator-related protein 1 (PGC-1-related coactivator) (PRC)                                                                                                                    | FUNCTION: Acts as a coactivator during transcriptional activation of nuclear genes related to mitochondrial biogenesis and cell growth. Involved in the transcription coactivation of CREB and NRF1 target genes (By similarity).                                                                                                                                                                                                                                                                                                                                                                                                                                                                                                                                                                                                                                                                                                                                                                                                                                                                                                                                                                                                                                                                                                                           |
| Q62376 | Snmp70               | U1 small nuclear ribonucleoprotein 70 kDa (U1 snRNP 70 kDa) (U1-70K) (snRNP70)                                                                                                                                                      | FUNCTION: Component of the spliceosomal U1 snRNP, which is essential for recognition of the pre-mRNA 5' splice-site and the subsequent assembly of the spliceosome. SNRNP70 binds to the loop I region of U1-snRNA.; FUNCTION: [Isoform 2]: Truncated isoforms that lack the RRM domain cannot bind U1-snRNA.                                                                                                                                                                                                                                                                                                                                                                                                                                                                                                                                                                                                                                                                                                                                                                                                                                                                                                                                                                                                                                               |
| Q9DBU6 | Rsrc1                | Serine/Arginine-related protein 53 (SRP53) (Arginine/serine-rich coiled-coil protein 1)                                                                                                                                             | FUNCTION: Plays a role in pre-mRNA splicing. Involved in both constitutive and alternative pre-mRNA splicing. May have a role in the recognition of the 3' splice site during the second step of splicing (By similarity).                                                                                                                                                                                                                                                                                                                                                                                                                                                                                                                                                                                                                                                                                                                                                                                                                                                                                                                                                                                                                                                                                                                                  |
| Q9DBF7 | Cwc25                | Pre-mRNA-splicing factor CWC25 homolog (Coiled-coil domain-containing protein 49) (Spliceosome-associated protein homolog CWC25)                                                                                                    | FUNCTION: Involved in pre-mRNA splicing as component of the spliceosome.                                                                                                                                                                                                                                                                                                                                                                                                                                                                                                                                                                                                                                                                                                                                                                                                                                                                                                                                                                                                                                                                                                                                                                                                                                                                                    |
| Q8VH51 | Rbm39                | RNA-binding protein 39 (Coactivator of activating protein 1 and estrogen receptors) (Coactivator of AP-1 and ERs) (RNA-binding motif protein 39) (RNA-binding region-containing protein 2) (Transcription coactivator CAPER)        | FUNCTION: Transcriptional coactivator for steroid nuclear receptors ESR1/ER-alpha and ESR2/ER-beta, and JUN/AP-1. May be involved in pre-mRNA splicing process.                                                                                                                                                                                                                                                                                                                                                                                                                                                                                                                                                                                                                                                                                                                                                                                                                                                                                                                                                                                                                                                                                                                                                                                             |
| Q8C8K3 | Srsf12               | Serine/arginine-rich splicing factor 12 (Splicing factor, arginine/serine-rich 13B)                                                                                                                                                 | FUNCTION: Splicing factor that seems to antagonize SR proteins in pre-mRNA splicing regulation.                                                                                                                                                                                                                                                                                                                                                                                                                                                                                                                                                                                                                                                                                                                                                                                                                                                                                                                                                                                                                                                                                                                                                                                                                                                             |
| Q7TSH6 | Scaf4                | SR-related and CTD-associated factor 4 (CTD-binding SR-like protein RA4) (Splicing factor, arginine/serine-rich 15)                                                                                                                 | FUNCTION: Anti-terminator protein required to prevent early mRNA termination during transcription. Together with SCAF8, acts by suppressing the use of early, alternative poly(A) sites, thereby preventing the accumulation of non-functional truncated proteins. Mechanistically, associates with the phosphorylated C-terminal heptapeptide repeat domain (CTD) of the largest RNA polymerase II subunit (POLR2A), and subsequently binds nascent RNA upstream of early polyadenylation sites to prevent premature mRNA transcript cleavage and polyadenylation. Independently of SCAF8, also acts as a suppressor of transcriptional readthrough.                                                                                                                                                                                                                                                                                                                                                                                                                                                                                                                                                                                                                                                                                                       |
| Q9WTV7 | Rlim                 | E3 ubiquitin-protein ligase RLIM (EC 2.3.2.27) (LIM domain-interacting RING finger protein) (RING finger LIM domain-binding protein) (R-LIM) (RING finger protein 12) (RING-type E3 ubiquitin transferase RLIM)                     | FUNCTION: E3 ubiquitin-protein ligase that acts as a negative coregulator for LIM homeodomain transcription factors by mediating the ubiquitination and subsequent degradation of LIM cofactors LDB1 and LDB2 and by mediating the recruitment of the SIN3a/histone deacetylase corepressor complex. Ubiquitination and degradation of LIM cofactors LDB1 and LDB2 allows DNA-bound LIM homeodomain transcription factors to interact with other protein partners such as RLIM. Plays a role in telomere length-mediated growth suppression by mediating the ubiquitination and degradation of TERF1. By targeting ZFP42 for degradation, acts as an activator of random inactivation of X chromosome in the embryo, a stochastic process in which one X chromosome is inactivated to minimize sex-related dosage differences of X-encoded genes in somatic cells of female placental mammals.                                                                                                                                                                                                                                                                                                                                                                                                                                                              |
| Q8BZ4  | Srek1                | Splicing regulatory glutamine/lysine-rich protein 1 (Serine/arginine-rich-splicing regulatory protein 86) (SRp86) (Splicing factor, arginine/serine-rich 12)                                                                        | FUNCTION: Participates in the regulation of alternative splicing by modulating the activity of other splice factors. Inhibits the splicing activity of SFRS1, SFRS2 and SFRS6. Augments the splicing activity of SFRS3 (By similarity).                                                                                                                                                                                                                                                                                                                                                                                                                                                                                                                                                                                                                                                                                                                                                                                                                                                                                                                                                                                                                                                                                                                     |
| O35691 | Pnn                  | Pinin                                                                                                                                                                                                                               | FUNCTION: Transcriptional activator binding to the E-box 1 core sequence of the E-cadherin promoter gene; the core-binding sequence is 5'CAGGTG-3'. Capable of reversing CTBP1-mediated transcription repression. Auxiliary component of the splicing-dependent multiprotein exon junction complex (EJC) deposited at splice junction on mRNAs. The EJC is a dynamic structure consisting of core proteins and several peripheral nuclear and cytoplasmic associated factors that join the complex only transiently either during EJC assembly or during subsequent mRNA metabolism. Participates in the regulation of alternative pre-mRNA splicing. Associates to spliced mRNA within 60 nt upstream of the 5'-splice sites. Component of the PSAP complex which binds RNA in a sequence-independent manner and is proposed to be recruited to the EJC prior to or during the splicing process and to regulate specific excision of introns in specific transcription subsets. Involved in the establishment and maintenance of epithelia cell-cell adhesion (By similarity).                                                                                                                                                                                                                                                                             |
| Q8CFC7 | Claspr               | CLK4-associated serine/arginine rich protein (Clk4-associating SR-related protein) (Serine/arginine-rich splicing factor 16) (Splicing factor, arginine/serine-rich 16) (Suppressor of white-apricot homolog 2)                     | FUNCTION: Probably functions as an alternative splicing regulator. May regulate the mRNA splicing of genes such as CLK1. May act by regulating members of the CLK kinase family.                                                                                                                                                                                                                                                                                                                                                                                                                                                                                                                                                                                                                                                                                                                                                                                                                                                                                                                                                                                                                                                                                                                                                                            |
| Q8CG20 | Cherp                | Calcium homeostasis endoplasmic reticulum protein (SR-related CTD-associated factor 6)                                                                                                                                              | FUNCTION: Involved in calcium homeostasis, growth and proliferation.                                                                                                                                                                                                                                                                                                                                                                                                                                                                                                                                                                                                                                                                                                                                                                                                                                                                                                                                                                                                                                                                                                                                                                                                                                                                                        |



|        |         |                                                                                                                                                                                                                                                                                                              |                                                                                                                                                                                                                                                                                                                                                                                                                                                                                                                                                                                                                                                                                                                                                                                                                                                                                                                                                                                                                                                                                                                                                                                                                                                                                                                                                                                                                                                                                                                                                                                                                                                                                                                                                                                                    |
|--------|---------|--------------------------------------------------------------------------------------------------------------------------------------------------------------------------------------------------------------------------------------------------------------------------------------------------------------|----------------------------------------------------------------------------------------------------------------------------------------------------------------------------------------------------------------------------------------------------------------------------------------------------------------------------------------------------------------------------------------------------------------------------------------------------------------------------------------------------------------------------------------------------------------------------------------------------------------------------------------------------------------------------------------------------------------------------------------------------------------------------------------------------------------------------------------------------------------------------------------------------------------------------------------------------------------------------------------------------------------------------------------------------------------------------------------------------------------------------------------------------------------------------------------------------------------------------------------------------------------------------------------------------------------------------------------------------------------------------------------------------------------------------------------------------------------------------------------------------------------------------------------------------------------------------------------------------------------------------------------------------------------------------------------------------------------------------------------------------------------------------------------------------|
| Q3U9G9 | Lbr     | Delta(14)-sterol reductase LBR (Delta-14-SR) (EC 1.3.1.70) (3-beta-hydroxysterol Delta (14)-reductase) (C-14 sterol reductase) (C14SR) (Integral nuclear envelope inner membrane protein) (Lamin-B receptor) (Sterol C14-reductase)                                                                          | FUNCTION: Catalyzes the reduction of the C14-unsaturated bond of lanosterol, as part of the metabolic pathway leading to cholesterol biosynthesis (PubMed:18785926). Plays a critical role in myeloid cell cholesterol biosynthesis which is essential to both myeloid cell growth and functional maturation (PubMed:22140257). Mediates the activation of NADPH oxidases, perhaps by maintaining critical levels of cholesterol required for membrane lipid raft formation during neutrophil differentiation (PubMed:22140257). Anchors the lamina and the heterochromatin to the inner nuclear membrane (By similarity).                                                                                                                                                                                                                                                                                                                                                                                                                                                                                                                                                                                                                                                                                                                                                                                                                                                                                                                                                                                                                                                                                                                                                                         |
| P62996 | Tra2b   | Transformer-2 protein homolog beta (TRA-2 beta) (TRA2-beta) (Silica-induced gene 41 protein) (SIG-41) (Splicing factor, arginine/serine-rich 10) (Transformer-2 protein homolog B)                                                                                                                           | FUNCTION: Sequence-specific RNA-binding protein which participates in the control of pre-mRNA splicing. Can either activate or suppress exon inclusion. Acts additively with RBMX to promote exon 7 inclusion of the survival motor neuron SMN2. Activates the splicing of MAPT/Tau exon 10. Alters pre-mRNA splicing patterns by antagonizing the effects of splicing regulators, like RBMX. Binds to the AG-rich SE2 domain in the SMN exon 7 RNA. Binds to pre-mRNA (By similarity).                                                                                                                                                                                                                                                                                                                                                                                                                                                                                                                                                                                                                                                                                                                                                                                                                                                                                                                                                                                                                                                                                                                                                                                                                                                                                                            |
| O35326 | Srsf5   | Serine/arginine-rich splicing factor 5 (Delayed-early protein HRS) (Pre-mRNA-splicing factor SRP40) (Splicing factor, arginine/serine-rich 5)                                                                                                                                                                | FUNCTION: May be required for progression through G1 and entry into S phase of cell growth. May play a regulatory role in pre-mRNA splicing. Autoregulates its own expression. Plays a role in constitutive splicing and can modulate the selection of alternative splice sites (By similarity).                                                                                                                                                                                                                                                                                                                                                                                                                                                                                                                                                                                                                                                                                                                                                                                                                                                                                                                                                                                                                                                                                                                                                                                                                                                                                                                                                                                                                                                                                                   |
| Q569Z6 | Thrap3  | Thyroid hormone receptor-associated protein 3 (Thyroid hormone receptor-associated protein complex 150 kDa component) (Trap150)                                                                                                                                                                              | FUNCTION: Involved in pre-mRNA splicing. Remains associated with spliced mRNA after splicing which probably involves interactions with the exon junction complex (EJC). Can trigger mRNA decay which seems to be independent of nonsense-mediated decay involving premature stop codons (PTC) recognition. May be involved in nuclear mRNA decay. Involved in regulation of signal-induced alternative splicing. During splicing of PTPRC/CD45 is proposed to sequester phosphorylated SFQ from PTPRC/CD45 pre-mRNA in resting T-cells. Involved in cyclin-D1/CCND1 mRNA stability probably by acting as component of the SNARP complex which associates with both the 3' end of the CCND1 gene and its mRNA. Involved in response to DNA damage. Is excluded from DNA damage sites in a manner that parallels transcription inhibition; the function may involve the SNARP complex. Initially thought to play a role in transcriptional coactivation through its association with the TRAP complex; however, it is not regarded as a stable Mediator complex subunit. Cooperatively with HEL22, enhances the transcriptional activation mediated by PPARG, maybe through the stabilization of the PPARG binding to DNA in presence of ligand. May play a role in the terminal stage of adipocyte differentiation. Plays a role in the positive regulation of the circadian clock. Acts as a coactivator of the CLOCK-ARNTL/BMAL1 heterodimer and promotes its transcriptional activator activity and binding to circadian target genes (PubMed:24043798).                                                                                                                                                                                                                                         |
| Q9DF04 | Nkap    | NF-kappa-B-activating protein                                                                                                                                                                                                                                                                                | FUNCTION: Acts as a transcriptional repressor. Plays a role as a transcriptional corepressor of the Notch-mediated signaling required for T-cell development. Also involved in the TNF and IL-1 induced NF-kappa-B activation. Associates with chromatin at the Notch-regulated SKP2 promoter (By similarity).                                                                                                                                                                                                                                                                                                                                                                                                                                                                                                                                                                                                                                                                                                                                                                                                                                                                                                                                                                                                                                                                                                                                                                                                                                                                                                                                                                                                                                                                                     |
| Q80Z37 | Topors  | E3 ubiquitin-protein ligase Topors (EC 2.3.2.27) (RING-type E3 ubiquitin transferase Topors) (SUMO1-protein E3 ligase Topors) (Topoisomerase I-binding RING finger protein) (Topoisomerase I-binding arginine/serine-rich protein) (Tumor suppressor p53-binding protein 3) (p53-binding protein 3) (p53BP3) | FUNCTION: Functions as an E3 ubiquitin-protein ligase and as a E3 SUMO1-protein ligase. Probable tumor suppressor involved in cell growth, cell proliferation and apoptosis that regulates p53/TP53 stability through ubiquitin-dependent degradation. May regulate chromatin modification through sumoylation of several chromatin modification-associated proteins. May be involved in DNA-damage-induced cell death through IKKBE sumoylation.                                                                                                                                                                                                                                                                                                                                                                                                                                                                                                                                                                                                                                                                                                                                                                                                                                                                                                                                                                                                                                                                                                                                                                                                                                                                                                                                                  |
| A2RTL5 | Rsrc2   | Arginine/serine-rich coiled-coil protein 2                                                                                                                                                                                                                                                                   |                                                                                                                                                                                                                                                                                                                                                                                                                                                                                                                                                                                                                                                                                                                                                                                                                                                                                                                                                                                                                                                                                                                                                                                                                                                                                                                                                                                                                                                                                                                                                                                                                                                                                                                                                                                                    |
| Q3UC65 | Rsrp1   | Arginine/serine-rich protein 1                                                                                                                                                                                                                                                                               |                                                                                                                                                                                                                                                                                                                                                                                                                                                                                                                                                                                                                                                                                                                                                                                                                                                                                                                                                                                                                                                                                                                                                                                                                                                                                                                                                                                                                                                                                                                                                                                                                                                                                                                                                                                                    |
| Q80T23 | Sytl5   | Synaptotagmin-like protein 5                                                                                                                                                                                                                                                                                 | FUNCTION: May act as Rab effector protein and play a role in vesicle trafficking. Binds phospholipids (By similarity).                                                                                                                                                                                                                                                                                                                                                                                                                                                                                                                                                                                                                                                                                                                                                                                                                                                                                                                                                                                                                                                                                                                                                                                                                                                                                                                                                                                                                                                                                                                                                                                                                                                                             |
| Q61526 | ErbB3   | Receptor tyrosine-protein kinase erbB-3 (EC 2.7.10.1) (Glial growth factor receptor) (Proto-oncogene-like protein c-ErbB-3)                                                                                                                                                                                  | FUNCTION: Tyrosine-protein kinase that plays an essential role as cell surface receptor for neuregulins. Binds to neuregulin-1 (NRG1) and is activated by it; ligand-binding increases phosphorylation on tyrosine residues and promotes its association with the p85 subunit of phosphatidylinositol 3-kinase. May also be activated by CSPG5. Involved in the regulation of myeloid cell differentiation.                                                                                                                                                                                                                                                                                                                                                                                                                                                                                                                                                                                                                                                                                                                                                                                                                                                                                                                                                                                                                                                                                                                                                                                                                                                                                                                                                                                        |
| Q9CS00 | Cactin  | Cactin                                                                                                                                                                                                                                                                                                       | FUNCTION: Involved in the regulation of innate immune response. Acts as negative regulator of Toll-like receptor and interferon-regulatory factor (IRF) signaling pathways. Contributes to the regulation of transcriptional activation of NF-kappa-B target genes in response to endogenous proinflammatory stimuli. May play a role during early embryonic development. Probably involved in pre-mRNA splicing (By similarity).                                                                                                                                                                                                                                                                                                                                                                                                                                                                                                                                                                                                                                                                                                                                                                                                                                                                                                                                                                                                                                                                                                                                                                                                                                                                                                                                                                  |
| Q52K18 | Srrm1   | Serine/arginine repetitive matrix protein 1 (Plenty-of-prolines 101)                                                                                                                                                                                                                                         | FUNCTION: Part of pre- and post-splicing multiprotein mRNP complexes. Involved in numerous pre-mRNA processing events. Promotes constitutive and exonic splicing enhancer (ESE)-dependent splicing activation by bridging together sequence-specific (SR family proteins, SFRS4, SFRS5 and TRA2B/SFRS10) and basal snRNP (SNRP70 and SNRPA1) factors of the spliceosome. Stimulates mRNA 3'-end cleavage independently of the formation of an exon junction complex. Binds both pre-mRNA and spliced mRNA 20-25 nt upstream of exon-exon junctions. Binds RNA and DNA with low sequence specificity and has similar preference for either double- or single-stranded nucleic acid substrates.                                                                                                                                                                                                                                                                                                                                                                                                                                                                                                                                                                                                                                                                                                                                                                                                                                                                                                                                                                                                                                                                                                      |
| Q8K019 | Bclaf1  | Bcl-2-associated transcription factor 1 (Btf)                                                                                                                                                                                                                                                                | FUNCTION: Death-promoting transcriptional repressor. May be involved in cyclin-D1/CCND1 mRNA stability through the SNARP complex which associates with both the 3' end of the CCND1 gene and its mRNA (By similarity).                                                                                                                                                                                                                                                                                                                                                                                                                                                                                                                                                                                                                                                                                                                                                                                                                                                                                                                                                                                                                                                                                                                                                                                                                                                                                                                                                                                                                                                                                                                                                                             |
| Q5U4C3 | Scaf1   | Splicing factor, arginine/serine-rich 19 (SR-related and CTD-associated factor 1)                                                                                                                                                                                                                            | FUNCTION: May function in pre-mRNA splicing.                                                                                                                                                                                                                                                                                                                                                                                                                                                                                                                                                                                                                                                                                                                                                                                                                                                                                                                                                                                                                                                                                                                                                                                                                                                                                                                                                                                                                                                                                                                                                                                                                                                                                                                                                       |
| Q8BL97 | Srsf7   | Serine/arginine-rich splicing factor 7 (Splicing factor, arginine/serine-rich 7)                                                                                                                                                                                                                             | FUNCTION: Required for pre-mRNA splicing. Represses the splicing of MAPT/Tau exon 10. May function as export adapter involved in mRNA nuclear export such as of histone H2A. Binds mRNA which is thought to be transferred to the NXF1-NXT1 heterodimer for export (TAP/NXF1 pathway); enhances NXF1-NXT1 RNA-binding activity. RNA-binding is semi-sequence specific (By similarity).                                                                                                                                                                                                                                                                                                                                                                                                                                                                                                                                                                                                                                                                                                                                                                                                                                                                                                                                                                                                                                                                                                                                                                                                                                                                                                                                                                                                             |
| A2A6A1 | Gpatch8 | G patch domain-containing protein 8                                                                                                                                                                                                                                                                          |                                                                                                                                                                                                                                                                                                                                                                                                                                                                                                                                                                                                                                                                                                                                                                                                                                                                                                                                                                                                                                                                                                                                                                                                                                                                                                                                                                                                                                                                                                                                                                                                                                                                                                                                                                                                    |
| Q0P678 | Zc3h18  | Zinc finger CCHC domain-containing protein 18 (Nuclear protein NHN1)                                                                                                                                                                                                                                         |                                                                                                                                                                                                                                                                                                                                                                                                                                                                                                                                                                                                                                                                                                                                                                                                                                                                                                                                                                                                                                                                                                                                                                                                                                                                                                                                                                                                                                                                                                                                                                                                                                                                                                                                                                                                    |
| Q9JIX8 | Acin1   | Apoptotic chromatin condensation inducer in the nucleus (Acinus)                                                                                                                                                                                                                                             | FUNCTION: Auxiliary component of the splicing-dependent multiprotein exon junction complex (EJC) deposited at splice junction on mRNAs. The EJC is a dynamic structure consisting of core proteins and several peripheral nuclear and cytoplasmic associated factors that join the complex only transiently either during EJC assembly or during subsequent mRNA metabolism. Component of the ASAP complexes which bind RNA in a sequence-independent manner and are proposed to be recruited to the EJC prior to or during the splicing process and to regulate specific excision of introns in specific transcription subsets. ACIN1 confers RNA-binding to the complex. The ASAP complex can inhibit RNA processing during in vitro splicing reactions. The ASAP complex promotes apoptosis and is disassembled after induction of apoptosis. Involved in the splicing modulation of BCL2L1/Bcl-X (and probably other apoptotic genes); specifically inhibits formation of proapoptotic isoforms such as Bcl-X(S); the activity is different from the established EJC assembly and function. Induces apoptotic chromatin condensation after activation by CASP3. Regulates cyclin A1, but not cyclin A2, expression in leukemia cells (By similarity).                                                                                                                                                                                                                                                                                                                                                                                                                                                                                                                                          |
| Q3TWW8 | Srsf6   | Serine/arginine-rich splicing factor 6 (Pre-mRNA-splicing factor SRP55) (Splicing factor, arginine/serine-rich 6)                                                                                                                                                                                            | FUNCTION: Plays a role in constitutive splicing and modulates the selection of alternative splice sites. Plays a role in the alternative splicing of MAPT/Tau exon 10. Binds to alternative exons of TNC pre-mRNA and promotes the expression of alternatively spliced TNC. Plays a role in wound healing and in the regulation of keratinocyte differentiation and proliferation via its role in alternative splicing (By similarity).                                                                                                                                                                                                                                                                                                                                                                                                                                                                                                                                                                                                                                                                                                                                                                                                                                                                                                                                                                                                                                                                                                                                                                                                                                                                                                                                                            |
| Q61464 | Znf638  | Zinc finger protein 638 (Nuclear protein 220) (Zinc finger matrin-like protein)                                                                                                                                                                                                                              | FUNCTION: Transcription factor that binds to cytidine clusters in double-stranded DNA (By similarity). Plays a key role in the silencing of unintegrated retroviral DNA: some part of the retroviral DNA formed immediately after infection remains unintegrated in the host genome and is transcriptionally repressed (PubMed:30487602). Mediates transcriptional repression of unintegrated viral DNA by specifically binding to the cytidine clusters of retroviral DNA and mediating the recruitment of chromatin silencers, such as the HUSH complex, SETDB1 and the histone deacetylases HDAC1 and HDAC4 (PubMed:30487602). Acts as an early regulator of adipogenesis by acting as a transcription cofactor of CEBPs (CEBPA, CEBPB and/or CEBPG), controlling the expression of PPARG and probably of other proadipogenic genes, such as SREBF1 (PubMed:21602272). May also regulate alternative splicing of target genes during adipogenesis (PubMed:25024404).                                                                                                                                                                                                                                                                                                                                                                                                                                                                                                                                                                                                                                                                                                                                                                                                                            |
| Q80SY5 | Prp38b  | Pre-mRNA-splicing factor 38B                                                                                                                                                                                                                                                                                 | FUNCTION: May be required for pre-mRNA splicing.                                                                                                                                                                                                                                                                                                                                                                                                                                                                                                                                                                                                                                                                                                                                                                                                                                                                                                                                                                                                                                                                                                                                                                                                                                                                                                                                                                                                                                                                                                                                                                                                                                                                                                                                                   |
| Q569Z5 | Ddx46   | Probable ATP-dependent RNA helicase DDX46 (EC 3.6.4.13) (DEAD box protein 46)                                                                                                                                                                                                                                | FUNCTION: Plays an essential role in splicing, either prior to, or during A complex formation.                                                                                                                                                                                                                                                                                                                                                                                                                                                                                                                                                                                                                                                                                                                                                                                                                                                                                                                                                                                                                                                                                                                                                                                                                                                                                                                                                                                                                                                                                                                                                                                                                                                                                                     |
| Q8BT18 | Srrm2   | Serine/arginine repetitive matrix protein 2                                                                                                                                                                                                                                                                  | FUNCTION: Required for pre-mRNA splicing as component of the spliceosome.                                                                                                                                                                                                                                                                                                                                                                                                                                                                                                                                                                                                                                                                                                                                                                                                                                                                                                                                                                                                                                                                                                                                                                                                                                                                                                                                                                                                                                                                                                                                                                                                                                                                                                                          |
| Q8VE97 | Srsf4   | Serine/arginine-rich splicing factor 4 (Splicing factor, arginine/serine-rich 4)                                                                                                                                                                                                                             | FUNCTION: Plays a role in alternative splice site selection during pre-mRNA splicing. Represses the splicing of MAPT/Tau exon 10 (By similarity).                                                                                                                                                                                                                                                                                                                                                                                                                                                                                                                                                                                                                                                                                                                                                                                                                                                                                                                                                                                                                                                                                                                                                                                                                                                                                                                                                                                                                                                                                                                                                                                                                                                  |
| Q9QX47 | Son     | Protein SON (Negative regulatory element-binding protein) (NRE-binding protein)                                                                                                                                                                                                                              | FUNCTION: RNA-binding protein that acts as a mRNA splicing cofactor by promoting efficient splicing of transcripts that possess weak splice sites. Specifically promotes splicing of many cell-cycle and DNA-repair transcripts that possess weak splice sites, such as TUBG1, KATNB1, TUBGCP2, AURKB, PCNT, AKT1, RAD23A, and FANCG. Probably acts by facilitating the interaction between Serine/arginine-rich proteins such as SRSF2 and the RNA polymerase II. Also binds to DNA; binds to the consensus DNA sequence: 5'-GA[G/T]AN[CG]AG[C]C-3' (By similarity). Essential for correct RNA splicing of multiple genes critical for brain development, neuronal migration and metabolism, including TUBG1, FLNA, PNKP, WDR62, PSMD3, PCK2, PFKL, IDH2, and ACY1 (By similarity). May also regulate the ghrelin signaling in hypothalamic neuron by acting as a negative regulator of GHSR expression (PubMed:20876580).                                                                                                                                                                                                                                                                                                                                                                                                                                                                                                                                                                                                                                                                                                                                                                                                                                                                        |
| Q6PDM2 | Srsf1   | Serine/arginine-rich splicing factor 1 (ASF/SF2) (Pre-mRNA-splicing factor SRp30a) (Splicing factor, arginine/serine-rich 1)                                                                                                                                                                                 | FUNCTION: Plays a role in preventing exon skipping, ensuring the accuracy of splicing and regulating alternative splicing. Interacts with other spliceosomal components, via the RS domains, to form a bridge between the 5'- and 3'-splice site binding components, U1 snRNP and U2AF. Can stimulate binding of U1 snRNP to a 5'-splice site-containing pre-mRNA. Binds to purine-rich RNA sequences, either the octamer, 5'-RGAAGAAC-3' (=R-A or G) or the decamers, AGGACAGAGC/AGGACGAAGC. Binds preferentially to the 5'-CGAGGGCG-3' motif in vitro. Three copies of the octamer constitute a powerful splicing enhancer in vitro, the ASF/SF2 splicing enhancer (ASE) which can specifically activate ASE-dependent splicing (By similarity). Specifically regulates alternative splicing of cardiac isoforms of CAMK2D, LDB3/CYPHER and TNNT2/CTNT during heart remodeling at the juvenile to adult transition. The inappropriate accumulation of a neonatal and neuronal isoform of CAMK2D in the adult heart results in aberrant calcium handling and defective excitation-contraction coupling in cardiomyocytes. May function as export adapter involved in mRNA nuclear export through the TAP/NXF1 pathway (PubMed:15652482).                                                                                                                                                                                                                                                                                                                                                                                                                                                                                                                                                          |
| P26369 | U2af2   | Splicing factor U2AF 65 kDa subunit (U2 auxiliary factor 65 kDa subunit) (U2 snRNP auxiliary factor large subunit)                                                                                                                                                                                           | FUNCTION: Plays a role in pre-mRNA splicing and 3'-end processing. By recruiting PRPF19 and the PRP19C/Prp19 complex/NTC/Nineteen complex to the RNA polymerase II C-terminal domain (CTD), and thereby pre-mRNA, may couple transcription to splicing. Required for the export of mRNA out of the nucleus, even if the mRNA is encoded by an intron-less gene. Positively regulates pre-mRNA 3'-end processing by recruiting the CFIm complex to cleavage and polyadenylation signals.                                                                                                                                                                                                                                                                                                                                                                                                                                                                                                                                                                                                                                                                                                                                                                                                                                                                                                                                                                                                                                                                                                                                                                                                                                                                                                            |
| Q9D883 | U2af1   | Splicing factor U2AF 35 kDa subunit (U2 auxiliary factor 35 kDa subunit) (U2 snRNP auxiliary factor small subunit)                                                                                                                                                                                           | FUNCTION: Plays a critical role in both constitutive and enhancer-dependent splicing by mediating protein-protein interactions and protein-RNA interactions required for accurate 3'-splice site selection. Recruits U2 snRNP to the branch point. Directly mediates interactions between U2AF2 and proteins bound to the enhancers and thus may function as a bridge between U2AF2 and the enhancer complex to recruit it to the adjacent intron (By similarity).                                                                                                                                                                                                                                                                                                                                                                                                                                                                                                                                                                                                                                                                                                                                                                                                                                                                                                                                                                                                                                                                                                                                                                                                                                                                                                                                 |
| A2AR02 | Ppig    | Peptidyl-prolyl cis-trans isomerase G (PPIase G) (Peptidyl-prolyl isomerase G) (EC 5.2.1.8) (Cyclophilin G) (Rotamase G)                                                                                                                                                                                     | FUNCTION: PPIase that catalyzes the cis-trans isomerization of proline imidic peptide bonds in oligopeptides and may therefore assist protein folding. May be implicated in the folding, transport, and assembly of proteins. May play an important role in the regulation of pre-mRNA splicing.                                                                                                                                                                                                                                                                                                                                                                                                                                                                                                                                                                                                                                                                                                                                                                                                                                                                                                                                                                                                                                                                                                                                                                                                                                                                                                                                                                                                                                                                                                   |
| Q6PFR5 | Tra2a   | Transformer-2 protein homolog alpha (TRA-2 alpha) (TRA2-alpha) (Transformer-2 protein homolog A)                                                                                                                                                                                                             | FUNCTION: Sequence-specific RNA-binding protein which participates in the control of pre-mRNA splicing.                                                                                                                                                                                                                                                                                                                                                                                                                                                                                                                                                                                                                                                                                                                                                                                                                                                                                                                                                                                                                                                                                                                                                                                                                                                                                                                                                                                                                                                                                                                                                                                                                                                                                            |
| Q9JJA7 | Ccnl2   | Cyclin-L2 (Cyclin Ania-6b) (Paneth cell-enhanced expression protein) (PCEE)                                                                                                                                                                                                                                  | FUNCTION: Involved in pre-mRNA splicing. May induce cell death, possibly by acting on the transcription and RNA processing of apoptosis-related factors.                                                                                                                                                                                                                                                                                                                                                                                                                                                                                                                                                                                                                                                                                                                                                                                                                                                                                                                                                                                                                                                                                                                                                                                                                                                                                                                                                                                                                                                                                                                                                                                                                                           |
| E9Q5F9 | Setd2   | Histone-lysine N-methyltransferase SETD2 (EC 2.1.1.-) (Lysine N-methyltransferase 3A) (Protein-lysine N-methyltransferase SETD2) (EC 2.1.1.-) (SET domain-containing protein 2)                                                                                                                              | FUNCTION: Histone methyltransferase that specifically trimethylates 'Lys-36' of histone H3 (H3K36me3) using dimethylated 'Lys-36' (H3K36me2) as substrate (PubMed:18157086, PubMed:20133625). Represents the main enzyme generating H3K36me3, a specific tag for epigenetic transcriptional activation (PubMed:18157086, PubMed:20133625). Plays a role in chromatin structure modulation during elongation by coordinating recruitment of the FACT complex and by interacting with hyperphosphorylated POLR2A (By similarity). Acts as a key regulator of DNA mismatch repair in G1 and early S phase by generating H3K36me3, a mark required to recruit MSH6 subunit of the MutS alpha complex: early recruitment of the MutS alpha complex to chromatin to be replicated allows a quick identification of mismatch DNA to initiate the mismatch repair reaction (By similarity). Required for DNA double-strand break repair in response to DNA damage: acts by mediating formation of H3K36me3, promoting recruitment of RAD51 and DNA repair via homologous recombination (HR) (By similarity). Acts as a tumor suppressor (By similarity). H3K36me3 also plays an essential role in the maintenance of a heterochromatic state, by recruiting DNA methyltransferase DNMT3A (By similarity). H3K36me3 is also enhanced in intron-containing genes, suggesting that SETD2 recruitment is enhanced by splicing and that splicing is coupled to recruitment of elongating RNA polymerase (By similarity). Required during angiogenesis (PubMed:20133625). Required for endoderm development by promoting embryonic stem cell differentiation toward endoderm: acts by mediating formation of H3K36me3 in distal promoter regions of FGFR3, leading to regulate transcription initiation of FGFR3 |

|        |         |                                                                                                                                                                                                                                                                                                                                                                                    |                                                                                                                                                                                                                                                                                                                                                                                                                                                                                                                                                                                                                                                                                                                                                                                                                                                                                                                                                                                                                                                                                                                                                                                                                                                                                                                                                                                                                                                                                                                                                                                                                                                                               |
|--------|---------|------------------------------------------------------------------------------------------------------------------------------------------------------------------------------------------------------------------------------------------------------------------------------------------------------------------------------------------------------------------------------------|-------------------------------------------------------------------------------------------------------------------------------------------------------------------------------------------------------------------------------------------------------------------------------------------------------------------------------------------------------------------------------------------------------------------------------------------------------------------------------------------------------------------------------------------------------------------------------------------------------------------------------------------------------------------------------------------------------------------------------------------------------------------------------------------------------------------------------------------------------------------------------------------------------------------------------------------------------------------------------------------------------------------------------------------------------------------------------------------------------------------------------------------------------------------------------------------------------------------------------------------------------------------------------------------------------------------------------------------------------------------------------------------------------------------------------------------------------------------------------------------------------------------------------------------------------------------------------------------------------------------------------------------------------------------------------|
|        |         |                                                                                                                                                                                                                                                                                                                                                                                    | (PubMed:25242323). In addition to histones, also mediates methylation of other proteins, such as tubulins and STAT1 (PubMed:27518565). Trimethylates 'Lys-40' of alpha-tubulins such as TUBA1B (alpha-TubK40me3); alpha-TubK40me3 is required for normal mitosis and cytokinesis and may be a specific tag in cytoskeletal remodeling (PubMed:27518565). Involved in interferon-alpha-induced antiviral defense by mediating both monomethylation of STAT1 at 'Lys-525' and catalyzing H3K36me3 on promoters of some interferon-stimulated genes (ISGs) to activate gene transcription (By similarity).                                                                                                                                                                                                                                                                                                                                                                                                                                                                                                                                                                                                                                                                                                                                                                                                                                                                                                                                                                                                                                                                       |
| Q9CY14 | Luc7l   | Putative RNA-binding protein Luc7-like 1                                                                                                                                                                                                                                                                                                                                           | FUNCTION: May bind to RNA via its Arg/Ser-rich domain.                                                                                                                                                                                                                                                                                                                                                                                                                                                                                                                                                                                                                                                                                                                                                                                                                                                                                                                                                                                                                                                                                                                                                                                                                                                                                                                                                                                                                                                                                                                                                                                                                        |
| Q0P557 | Spata18 | Mitochondria-eating protein (Spermatogenesis-associated protein 18)                                                                                                                                                                                                                                                                                                                | FUNCTION: Key regulator of mitochondrial quality that mediates the repairing or degradation of unhealthy mitochondria in response to mitochondrial damage. Mediator of mitochondrial protein catabolic process (also named MALM) by mediating the degradation of damaged proteins inside mitochondria by promoting the accumulation in the mitochondrial matrix of hydrolases that are characteristic of the lysosomal lumen. Also involved in mitochondrion degradation of damaged mitochondria by promoting the formation of vacuole-like structures (named MIV), which engulf and degrade unhealthy mitochondria by accumulating lysosomes. May have a role in spermatogenesis, especially in cell differentiation from late elongate spermatids to mature spermatozoa (By similarity). The physical interaction of SPATA18/MIEAP, BNIP3 and BNIP3L/NIX at the mitochondrial outer membrane regulates the opening of a pore in the mitochondrial double membrane in order to mediate the translocation of lysosomal proteins from the cytoplasm to the mitochondrial matrix (By similarity).                                                                                                                                                                                                                                                                                                                                                                                                                                                                                                                                                                               |
| Q9DA19 | Cir1    | Corepressor interacting with RBPJ 1 (CBF1-interacting corepressor)                                                                                                                                                                                                                                                                                                                 | FUNCTION: Regulates transcription and acts as corepressor for RBPJ. Recruits RBPJ to the Sin3-histone deacetylase complex (HDAC). Required for RBPJ-mediated repression of transcription (By similarity). May modulate splice site selection during alternative splicing of pre-mRNAs.                                                                                                                                                                                                                                                                                                                                                                                                                                                                                                                                                                                                                                                                                                                                                                                                                                                                                                                                                                                                                                                                                                                                                                                                                                                                                                                                                                                        |
| P84104 | Srsf3   | Serine/arginine-rich splicing factor 3 (Pre-mRNA-splicing factor SRP20) (Protein X16) (Splicing factor, arginine/serine-rich 3)                                                                                                                                                                                                                                                    | FUNCTION: Splicing factor that specifically promotes exon-inclusion during alternative splicing. Interaction with YTHDC1, a RNA-binding protein that recognizes and binds N6-methyladenosine (m6A)-containing RNAs, promotes recruitment of SRSF3 to its mRNA-binding elements adjacent to m6A sites, leading to exon-inclusion during alternative splicing. Also functions as export adapter involved in mRNA nuclear export. Binds mRNA which is thought to be transferred to the NXF1-NXT1 heterodimer for export (TAP/NXF1 pathway); enhances NXF1-NXT1 RNA-binding activity. Involved in nuclear export of m6A-containing mRNAs via interaction with YTHDC1; interaction with YTHDC1 facilitates m6A-containing mRNA-binding to both SRSF3 and NXF1, promoting mRNA nuclear export. RNA-binding is semi-sequence specific.                                                                                                                                                                                                                                                                                                                                                                                                                                                                                                                                                                                                                                                                                                                                                                                                                                               |
| A2A4P0 | Dhx8    | ATP-dependent RNA helicase DHX8 (EC 3.6.4.13) (DEAH box protein 8)                                                                                                                                                                                                                                                                                                                 | FUNCTION: Involved in pre-mRNA splicing as component of the spliceosome. Facilitates nuclear export of spliced mRNA by releasing the RNA from the spliceosome.                                                                                                                                                                                                                                                                                                                                                                                                                                                                                                                                                                                                                                                                                                                                                                                                                                                                                                                                                                                                                                                                                                                                                                                                                                                                                                                                                                                                                                                                                                                |
| Q99M28 | Rnps1   | RNA-binding protein with serine-rich domain 1                                                                                                                                                                                                                                                                                                                                      | FUNCTION: Part of pre- and post-splicing multiprotein mRNP complexes. Auxiliary component of the splicing-dependent multiprotein exon junction complex (EJC) deposited at splice junction on mRNAs. The EJC is a dynamic structure consisting of core proteins and several peripheral nuclear and cytoplasmic associated factors that join the complex only transiently either during EJC assembly or during subsequent mRNA metabolism. Component of the ASAP and PSAP complexes which bind RNA in a sequence-independent manner and are proposed to be recruited to the EJC prior to or during the splicing process and to regulate specific excision of introns in specific transcription subsets. The ASAP complex can inhibit RNA processing during in vitro splicing reactions. The ASAP complex promotes apoptosis and is disassembled after induction of apoptosis. Enhances the formation of the ATP-dependent A complex of the spliceosome. Involved in both constitutive splicing and, in association with SRP54 and TRA2B/SFRS10, in distinctive modulation of alternative splicing in a substrate-dependent manner. Involved in the splicing modulation of BCL2L1/Bcl-X (and probably other apoptotic genes); specifically inhibits formation of proapoptotic isoforms such as Bcl-X(S); the activity is different from the established EJC assembly and function. Participates in mRNA 3'-end cleavage. Involved in UPF2-dependent nonsense-mediated decay (NMD) of mRNAs containing premature stop codons. Also mediates increase of mRNA abundance and translational efficiency. Binds spliced mRNA 20-25 nt upstream of exon-exon junctions (By similarity). |
| A2AJT4 | Pnir    | Arginine/serine-rich protein PNISR (Serine/arginine-rich-splicing regulatory protein 130) (SRp130) (Splicing factor, arginine/serine-rich 130) (Splicing factor, arginine/serine-rich 18)                                                                                                                                                                                          |                                                                                                                                                                                                                                                                                                                                                                                                                                                                                                                                                                                                                                                                                                                                                                                                                                                                                                                                                                                                                                                                                                                                                                                                                                                                                                                                                                                                                                                                                                                                                                                                                                                                               |
| Q69ZA1 | Cdk13   | Cyclin-dependent kinase 13 (EC 2.7.11.22) (EC 2.7.11.23) (CDC2-related protein kinase 5) (Cell division cycle 2-like protein kinase 5) (Cell division protein kinase 13)                                                                                                                                                                                                           | FUNCTION: Cyclin-dependent kinase which displays CTD kinase activity and is required for RNA splicing. Has CTD kinase activity by hyperphosphorylating the C-terminal heptapeptide repeat domain (CTD) of the largest RNA polymerase II subunit RPB1, thereby acting as a key regulator of transcription elongation. Required for RNA splicing, probably by phosphorylating SRSF1/SF2. Required during hematopoiesis.                                                                                                                                                                                                                                                                                                                                                                                                                                                                                                                                                                                                                                                                                                                                                                                                                                                                                                                                                                                                                                                                                                                                                                                                                                                         |
| Q99ME9 | Gtbp4   | Nucleolar GTP-binding protein 1 (Chronic renal failure gene protein) (GTP-binding protein NGB)                                                                                                                                                                                                                                                                                     | FUNCTION: Involved in the biogenesis of the 60S ribosomal subunit.                                                                                                                                                                                                                                                                                                                                                                                                                                                                                                                                                                                                                                                                                                                                                                                                                                                                                                                                                                                                                                                                                                                                                                                                                                                                                                                                                                                                                                                                                                                                                                                                            |
| Q8K194 | Snmp27  | U4/U6.U5 small nuclear ribonucleoprotein 27 kDa protein (U4/U6.U5 snRNP 27 kDa protein) (U4/U6.U5-27K) (U4/U6.U5 tri-snRNP-associated protein 3)                                                                                                                                                                                                                                   | FUNCTION: May play a role in mRNA splicing.                                                                                                                                                                                                                                                                                                                                                                                                                                                                                                                                                                                                                                                                                                                                                                                                                                                                                                                                                                                                                                                                                                                                                                                                                                                                                                                                                                                                                                                                                                                                                                                                                                   |
| Q9R0U0 | Srsf10  | Serine/arginine-rich splicing factor 10 (FUS-interacting serine-arginine-rich protein 1) (Neural-salient serine/arginine-rich protein) (Neural-specific SR protein) (Splicing factor, arginine/serine-rich 13A) (TLS-associated protein with Ser-Arg repeats) (TASR) (TLS-associated protein with SR repeats) (TLS-associated serine-arginine protein) (TLS-associated SR protein) | FUNCTION: Splicing factor that in its dephosphorylated form acts as a general repressor of pre-mRNA splicing. Seems to interfere with the U1 snRNP 5'-splice recognition of SNRNP70. Required for splicing repression in M-phase cells and after heat shock. Also acts as a splicing factor that specifically promotes exon skipping during alternative splicing. Interaction with YTHDC1, a RNA-binding protein that recognizes and binds N6-methyladenosine (m6A)-containing RNAs, prevents SRSF10 from binding to its mRNA-binding sites close to m6A-containing regions, leading to inhibit exon skipping during alternative splicing (By similarity). May be involved in regulation of alternative splicing in neurons (PubMed:10583508).                                                                                                                                                                                                                                                                                                                                                                                                                                                                                                                                                                                                                                                                                                                                                                                                                                                                                                                                |
| Q9R020 | Zranb2  | Zinc finger Ran-binding domain-containing protein 2 (Zinc finger protein 265) (Zinc finger, splicing)                                                                                                                                                                                                                                                                              | FUNCTION: Splice factor required for alternative splicing of TRA2B/SFRS10 transcripts. May interfere with constitutive 5'-splice site selection (By similarity).                                                                                                                                                                                                                                                                                                                                                                                                                                                                                                                                                                                                                                                                                                                                                                                                                                                                                                                                                                                                                                                                                                                                                                                                                                                                                                                                                                                                                                                                                                              |
| Q61136 | Prpf4b  | Serine/threonine-protein kinase PRP4 homolog (EC 2.7.11.1) (PRP4 pre-mRNA-processing factor 4 homolog) (Pre-mRNA protein kinase)                                                                                                                                                                                                                                                   | FUNCTION: Has a role in pre-mRNA splicing. Phosphorylates SF2/ASF.                                                                                                                                                                                                                                                                                                                                                                                                                                                                                                                                                                                                                                                                                                                                                                                                                                                                                                                                                                                                                                                                                                                                                                                                                                                                                                                                                                                                                                                                                                                                                                                                            |
| Q9Z0U1 | Tjp2    | Tight junction protein ZO-2 (Tight junction protein 2) (Zona occludens protein 2) (Zonula occludens protein 2)                                                                                                                                                                                                                                                                     | FUNCTION: Plays a role in tight junctions and adherens junctions.                                                                                                                                                                                                                                                                                                                                                                                                                                                                                                                                                                                                                                                                                                                                                                                                                                                                                                                                                                                                                                                                                                                                                                                                                                                                                                                                                                                                                                                                                                                                                                                                             |
| Q7TNC4 | Luc7l2  | Putative RNA-binding protein Luc7-like 2 (CGI-74 homolog)                                                                                                                                                                                                                                                                                                                          | FUNCTION: May bind to RNA via its Arg/Ser-rich domain.                                                                                                                                                                                                                                                                                                                                                                                                                                                                                                                                                                                                                                                                                                                                                                                                                                                                                                                                                                                                                                                                                                                                                                                                                                                                                                                                                                                                                                                                                                                                                                                                                        |

**Table S3 (Related to Figure 2).** RNF12 phosphorylation sites identified by immunoprecipitation-mass spectrometry

| <b>Experiment 1</b> |                   |                  |                                    |                    |                        |
|---------------------|-------------------|------------------|------------------------------------|--------------------|------------------------|
| <b>pep_exp_mz</b>   | <b>pep_exp_mr</b> | <b>pep_score</b> | <b>pep_seq</b>                     | <b>pep_var_mod</b> | <b>residue</b>         |
| 516.5920            | 1546.7504         | 23               | R.SRSPLQPTSEIPR.R                  | P (ST)             | S227, S229             |
| 801.8524            | 1601.6868         | (26)             | R.RLSVENMESSSQ.R.Q                 | P (ST)             | S163                   |
| 809.8495            | 1617.6818         | (27)             | R.RLSVENMESSSQ.R.Q                 | O (M); P (ST)      | S163                   |
| <b>Experiment 2</b> |                   |                  |                                    |                    |                        |
| <b>pep_exp_mz</b>   | <b>pep_exp_mr</b> | <b>pep_score</b> | <b>pep_seq</b>                     | <b>pep_var_mod</b> | <b>residue</b>         |
| 701.786             | 1401.5562         | 30               | EGPPPQSPDENR                       | P (ST)             | S78                    |
| 774.3826            | 1546.7504         | 40               | SRSPLQPTSEIPR                      | P (ST)             | S229                   |
| 801.8502            | 1601.6868         | 46               | RLSVENMESSSQ.R                     | P (ST)             | S163                   |
| 809.8483            | 1617.6818         | 62               | RLSVENMESSSQ.R                     | O (M); P (ST)      | S163                   |
| 1230.5322           | 2459.0489         | 78               | AGESDDVTNSDSIIDWLN.SVR             | P (ST)             | S88, S89               |
| 1255.2161           | 3762.6282         | 32               | EGPPPQSPDENRAGESDDVTNSDSIIDWLN.SVR | P (ST)             | S78, S88, S89          |
| <b>Experiment 3</b> |                   |                  |                                    |                    |                        |
| <b>pep_exp_mz</b>   | <b>pep_exp_mr</b> | <b>pep_score</b> | <b>pep_seq</b>                     | <b>pep_var_mod</b> | <b>residue</b>         |
| 701.7868            | 1401.559          | 48               | EGPPPQSPDENR                       | P (ST)             | S78                    |
| 774.3839            | 1546.7531         | 44               | SRSPLQPTSEIPR                      | P (ST)             | S227                   |
| 516.5918            | 1546.7536         | 27               | SRSPLQPTSEIPR                      | P (ST)??           | S227, S229, T234       |
| 809.8502            | 1617.6858         | 68               | RLSVENMESSSQ.R                     | O (M); P (ST)      | S163                   |
| 814.3668            | 1626.719          | 37               | SRSPLQPTSEIPR                      | 2 P (ST)           | S227, S229             |
| 661.9747            | 1982.9024         | 19               | AERSRSP.LQPTSEIPR                  | 2 P (ST)??         | S227, S229, T234, S235 |
| <b>Experiment 4</b> |                   |                  |                                    |                    |                        |
| <b>pep_exp_mz</b>   | <b>pep_exp_mr</b> | <b>pep_score</b> | <b>pep_seq</b>                     | <b>pep_var_mod</b> | <b>residue</b>         |
| 474.7062            | 947.3979          | 29               | SRSPEHR                            | P (ST)??           | S212, S214             |
| 701.7858            | 1401.5571         | 30               | EGPPPQSPDENR                       | P (ST)             | S78                    |
| 774.3807            | 1546.7469         | 43               | SRSPLQPTSEIPR                      | P (ST)             | S229                   |
| 809.8483            | 1617.6821         | 50               | RLSVENMESSSQ.R                     | O (M); P (ST)??    | S163                   |
| 814.3668            | 1626.719          | 22               | SRSPLQPTSEIPR                      | 2 P (ST)??         | S227, S229, T234, S235 |
| 905.9172            | 1809.8198         | 21               | AERNSAEAVTEVPTTR                   | P (ST)??           | S194, T199             |
| 1230.5315           | 2459.0484         | 73               | AGESDDVTNSDSIIDWLN.SVR             | P (ST)??           | S88, S89, T93,         |
| 1255.2163           | 3762.6271         | 39               | EGPPPQSPDENRAGESDDVTNSDSIIDWLN.SVR | P (ST)             | S78                    |

Phosphosite Localisation data obtained from Proteome Discoverer 1.4-SP1 –PhosphoRS3.1 or Proteome Discoverer 2.0-ptmRS. Underlined S T is interpretation of Mascot and MS2 data. Bold S T is a very good assignment, S T is used where identification is not certain, ?? means phosphorylation could be in any of the sites. pep\_exp\_mz: Observed or experimental m/z value, pep\_exp\_mr: Molecular mass calculated from experimental m/z value, pep\_score: Mascot score for PSM (Peptide sequence match), pep\_seq: Peptide sequence in 1 letter code, pep\_var\_mod: Variable modifications from all sources as list of names.

**Table S4 (Related to Figure 2).** RNF12 phosphorylation sites identified via SRPK in vitro phosphorylation and mass spectrometry

| <b>SRPK1 5 min</b>  |                   |                  |                           |                    |
|---------------------|-------------------|------------------|---------------------------|--------------------|
| <b>pep_exp mz</b>   | <b>pep_exp mr</b> | <b>pep_score</b> | <b>pep_seq</b>            | <b>pep_var_mod</b> |
| 460.2178            | 918.4212          | (24)             | R.TYVSTIR.I               | P (ST)             |
| 639.3107            | 1276.6176         | (20)             | R.QQISGPELLGR.G           | P (ST)             |
| 652.8156            | 1303.6173         | (31)             | R.SPLQPTSEIPR.R           | P (ST)             |
| 516.5908            | 1546.7504         | (22)             | R.SRSPLQPTSEIPR.R         | P (ST)             |
| 774.3820            | 1546.7504         | (47)             | R.SRSPLQPTSEIPR.R         | P (ST)             |
| 543.2460            | 1626.7168         | (26)             | R.SRSPLQPTSEIPR.R         | 2 P (ST)           |
| 814.3652            | 1626.7168         | (41)             | R.SRSPLQPTSEIPR.R         | 2 P (ST)           |
| 838.3497            | 1674.6886         | (46)             | R.SQAPNNTVYESER.G         | P (ST)             |
| 959.9175            | 1917.8218         | 85               | R.SRSQAPNNTVYESER.G       | P (ST)             |
| 640.2810            | 1917.8218         | (48)             | R.SRSQAPNNTVYESER.G       | P (ST)             |
| 992.4553            | 1982.8976         | (28)             | R.AERSRSPLOPTSEIPR.R      | 2 P (ST)           |
| 661.9727            | 1982.8976         | 40               | R.AERSRSPLOPTSEIPR.R      | 2 P (ST)           |
| 1027.4431           | 2052.8749         | (29)             | R.RAPTLEQSSSENEPEGSSR.T   | P (ST)             |
| 685.2983            | 2052.8749         | (60)             | R.RAPTLEQSSSENEPEGSSR.T   | P (ST)             |
| 689.6444            | 2065.9205         | (21)             | R.DNNLLGTPGESTEEELLR.R    | P (ST)             |
| 771.0147            | 2310.0237         | 38               | R.RAPTLEQSSSENEPEGSSRTR.H | P (ST)             |
| <b>SRPK1 60 min</b> |                   |                  |                           |                    |
| <b>pep_exp mz</b>   | <b>pep_exp mr</b> | <b>pep_score</b> | <b>pep_seq</b>            | <b>pep_var_mod</b> |
| 460.2179            | 918.4212          | (19)             | R.TYVSTIR.I               | P (ST)             |
| 514.6891            | 1027.3637         | 19               | R.SRSPEHR.R               | 2 P (ST)           |
| 628.2581            | 1254.5020         | 21               | R.ARSRSPPEHR.R            | 2 P (ST)           |
| 516.5908            | 1546.7504         | (27)             | R.SRSPLQPTSEIPR.R         | P (ST)             |
| 774.3821            | 1546.7504         | 50               | R.SRSPLQPTSEIPR.R         | P (ST)             |
| 814.3652            | 1626.7168         | (41)             | R.SRSPLQPTSEIPR.R         | 2 P (ST)           |
| 543.2462            | 1626.7168         | (21)             | R.SRSPLQPTSEIPR.R         | 2 P (ST)           |
| 838.3506            | 1674.6886         | (69)             | R.SQAPNNTVYESER.G         | P (ST)             |
| 949.3937            | 1896.7738         | (50)             | R.APTLEQSSSENEPEGSSR.T    | P (ST)             |
| 959.9170            | 1917.8218         | 82               | R.SRSQAPNNTVYESER.G       | P (ST)             |
| 640.2809            | 1917.8218         | (29)             | R.SRSQAPNNTVYESER.G       | P (ST)             |
| 992.4556            | 1982.8976         | 39               | R.AERSRSPLOPTSEIPR.R      | 2 P (ST)           |
| 1027.4439           | 2052.8749         | (48)             | R.RAPTLEQSSSENEPEGSSR.T   | P (ST)             |
| 685.2986            | 2052.8749         | (50)             | R.RAPTLEQSSSENEPEGSSR.T   | P (ST)             |
| 752.6523            | 2254.9369         | 35               | R.IRSRSPQAPNNTVYESER.G    | 2 P (ST)           |
| 771.0147            | 2310.0237         | 43               | R.RAPTLEQSSSENEPEGSSRTR.H | P (ST)             |
| 578.5131            | 2310.0237         | (19)             | R.RAPTLEQSSSENEPEGSSRTR.H | P (ST)             |
| <b>SRPK2 5 min</b>  |                   |                  |                           |                    |
| <b>pep_exp mz</b>   | <b>pep_exp mr</b> | <b>pep_score</b> | <b>pep_seq</b>            | <b>pep_var_mod</b> |
| 473.2131            | 944.4117          | 35               | GLFAASGSR                 | P (ST)             |
| 516.5906            | 1546.7499         | 33               | SRSPLQPTSEIPR             | P (ST)             |
| 543.2464            | 1626.7174         | 18               | SRSPLQPTSEIPR             | 2 P (ST)           |
| 553.516             | 2210.0349         | 24               | ARAERSRSPLOPTSEIPR        | 2 P (ST)           |
| 578.5132            | 2310.0236         | 38               | RAPTLEQSSSENEPEGSSRTR     | P (ST)             |
| 635.3174            | 1902.9303         | 38               | AERSRSPLOPTSEIPR          | P (ST)             |
| 640.2807            | 1917.8203         | 38               | SRSQAPNNTVYESER           | P (ST)             |
| 661.9725            | 1982.8958         | 29               | AERSRSPLOPTSEIPR          | 2 P (ST)           |
| 685.2986            | 2052.8741         | 51               | RAPTLEQSSSENEPEGSSR       | P (ST)             |
| 718.9813            | 2153.922          | 31               | APTLEQSSSENEPEGSSRTR      | P (ST)             |
| 750.8328            | 1499.651          | 20               | AVSRTNPNNGDFR             | P (ST)             |
| 752.6522            | 2254.9348         | 42               | TRRSQAPNNTVYESER          | 2 P (ST)           |
| 771.0148            | 2310.0225         | 51               | RAPTLEQSSSENEPEGSSRTR     | P (ST)             |
| 774.382             | 1546.7495         | 47               | SRSPLQPTSEIPR             | P (ST)             |
| 814.3648            | 1626.7151         | 25               | SRSPLQPTSEIPR             | 2 P (ST)           |
| 814.3654            | 1626.7162         | 21               | SRSPLQPTSEIPR             | 2 P (ST)           |
| 838.3527            | 1674.6909         | 57               | SQAPNNTVYESER             | P (ST)             |
| 959.9179            | 1917.8213         | 69               | SRSQAPNNTVYESER           | P (ST)             |
| 992.455             | 1982.8955         | 27               | AERSRSPLOPTSEIPR          | 2 P (ST)           |
| 1027.4439           | 2052.8731         | 36               | RAPTLEQSSSENEPEGSSR       | P (ST)             |
| 1106.0253           | 2210.036          | 18               | ARAERSRSPLOPTSEIPR        | 2 P (ST)           |
| <b>SRPK2 60 min</b> |                   |                  |                           |                    |
| <b>pep_exp mz</b>   | <b>pep_exp mr</b> | <b>pep_score</b> | <b>pep_seq</b>            | <b>pep_var_mod</b> |
| 460.2179            | 918.4212          | 31               | TYVSTIR                   | P (ST)             |
| 473.213             | 944.4115          | 55               | GLFAASGSR                 | P (ST)             |
| 493.2267            | 984.4388          | 20               | DSIASRTR                  | P (ST)             |
| 500.8911            | 1499.6514         | 25               | AVSRTNPNNGDFR             | P (ST)             |
| 516.5907            | 1546.7503         | 36               | SRSPLQPTSEIPR             | P (ST)             |
| 534.7452            | 1067.4759         | 21               | NVERVESR                  | P (ST)             |
| 534.9023            | 1601.6852         | 21               | RLSVENMESSQR              | P (ST)             |
| 540.2346            | 1617.6819         | 35               | RLSVENMESSQR              | O (M); P (ST)      |
| 543.2468            | 1626.7187         | 28               | SRSPLQPTSEIPR             | 2 P (ST)           |
| 578.5133            | 2310.0241         | 50               | RAPTLEQSSSENEPEGSSRTR     | P (ST)             |
| 604.2824            | 1809.8254         | 29               | AERN\$AEAVTEVPTTR         | P (ST)             |
| 633.2654            | 1896.7743         | 42               | APTLEQSSSENEPEGSSR        | P (ST)             |
| 640.2813            | 1917.8221         | 45               | SRSQAPNNTVYESER           | P (ST)             |
| 652.8159            | 1303.6172         | 25               | SPLQPTSEIPR               | P (ST)             |
| 661.9733            | 1982.8982         | 30               | AERSRSPLOPTSEIPR          | 2 P (ST)           |
| 685.2987            | 2052.8743         | 55               | RAPTLEQSSSENEPEGSSR       | P (ST)             |
| 711.9543            | 2132.8412         | 33               | RAPTLEQSSSENEPEGSSR       | 2 P (ST)           |
| 718.9818            | 2153.9236         | 27               | APTLEQSSSENEPEGSSRTR      | P (ST)             |
| 725.9974            | 2174.9703         | 23               | TRRSQAPNNTVYESER          | P (ST)             |
| 750.8325            | 1499.6505         | 32               | AVSRTNPNNGDFR             | P (ST)             |
| 752.6528            | 2254.9365         | 49               | TRRSQAPNNTVYESER          | 2 P (ST)           |
| 771.0143            | 2310.021          | 31               | RAPTLEQSSSENEPEGSSRTR     | P (ST)             |
| 771.0155            | 2310.0247         | 26               | RAPTLEQSSSENEPEGSSRTR     | P (ST)             |

|           |           |    |                            |               |
|-----------|-----------|----|----------------------------|---------------|
| 774.382   | 1546.7495 | 47 | <u>S</u> RSPLQPTSEIPR      | P (ST)        |
| 801.8499  | 1601.6853 | 70 | RL <u>S</u> VENMESSSQ      | P (ST)        |
| 809.8482  | 1617.6819 | 40 | RL <u>S</u> VENMESSSQ      | O (M); P (ST) |
| 814.3657  | 1626.7169 | 45 | <u>S</u> RSPLQPTSEIPR      | 2 P (ST)      |
| 838.3528  | 1674.6911 | 58 | <u>S</u> QAPNNTVYESER      | P (ST)        |
| 854.3486  | 1706.6827 | 19 | <u>S</u> RSPLQPTSEIPR      | 3 P (ST)      |
| 949.3945  | 1896.7744 | 58 | APTLEQSSENEPEGSSR          | P (ST)        |
| 959.9175  | 1917.8204 | 79 | <u>S</u> RSQAPNNTVYESER    | P (ST)        |
| 992.4556  | 1982.8966 | 24 | AERS <u>S</u> RSPLQPTSEIPR | 2 P (ST)      |
| 1027.4443 | 2052.8741 | 61 | RAPTLEQSSENEPEGSSR         | P (ST)        |

Phosphosite Localisation data obtained from Proteome Discoverer 1.4-SP1 –PhosphoRS3.1 or Proteome Discoverer 2.0-ptmRS. Underlined S T is interpretation of Mascot and MS2 data. Bold S T is a very good assignment, S T is used where identification is not certain, ?? means phosphorylation could be in any of the sites. pep\_exp\_mz: Observed or experimental m/z value, pep\_exp\_mr: Molecular mass calculated from experimental m/z value, pep\_score: Mascot score for PSM (Peptide sequence match), pep\_seq: Peptide sequence in 1 letter code, pep\_var\_mod: Variable modifications from all sources as list of names.

**Table S5 (Related to Figure 5).** Genes assigned to terms related to 'Neuron' identified by Gene Ontology analysis

| GO: 0048699 | GO: 0030182 | GO: 0031175 | GO: 0048666 | GO: 0048812 | GO: 0045664 | GO: 0010975 | GO: 0048667 | GO: 0045665 | GO: 0010976 | GO: 0010977 | GO: 0097485 | GO: 0045666 | GO: 0051402 | GO: 1990138 |
|-------------|-------------|-------------|-------------|-------------|-------------|-------------|-------------|-------------|-------------|-------------|-------------|-------------|-------------|-------------|
| Pcsk9       | Pcsk9       | Inpp5f      | Inpp5f      | Unc5a       | Inpp5f      | Inpp5f      | Unc5a       | Inpp5f      | Rrn3        | Inpp5f      | Unc5a       | Rrn3        | Pcsk9       | ApoE        |
| Inpp5f      | Inpp5f      | Rrn3        | Rrn3        | Foxp1       | Rrn3        | Rrn3        | Foxp1       | Rap1gap     | Rapgef1     | ApoE        | Foxp1       | Rapgef1     | Arb1        | Ddr1        |
| Rrn3        | Rrn3        | Unc5a       | Unc5a       | Adarb1      | Rapgef1     | Rapgef1     | Adarb1      | ApoE        | Abl2        | Cit         | Agrn        | Abl2        | Adarb1      | Dpysl2      |
| Ttkb1       | Unc5a       | Rapgef1     | Rapgef1     | Arhgef28    | Rapgef1     | Abl2        | Arhgef28    | Cd24a       | Ap2a1       | Crmp1       | Crmp1       | Ank3        | Ap2a1       | Dcl1        |
| Unc5a       | Rapgef1     | Foxp1       | Foxp1       | Abl2        | Abl2        | Agrn        | Abl2        | Cit         | ApoE        | Epha4       | Epha4       | Boc         | ApoE        | Agrn        |
| Rapgef1     | Foxp1       | Mcf2        | Mcf2        | Agrn        | Agrn        | Ap2a1       | Agrn        | Crmp1       | Dil1        | Bmp4        | Bmp4        | Bcl11a      | Bmp4        | Fn1         |
| Foxp1       | Mcf2        | Adarb1      | Adarb1      | Ank3        | Ap2a1       | ApoE        | Ank3        | Dil1        | Camk2b      | Ptk2        | Camk2b      | Ptk2        | Bmpr1b      | Impact      |
| Mcf2        | Ehmt2       | Arhgef28    | Arhgef28    | Boc         | ApoE        | Bmp4        | Boc         | Epha4       | Cd24a       | Gfap        | Runx3       | Cd24a       | Cacna1a     | Arhgap4     |
| Ehmt2       | Rap1gap     | Abl2        | Abl2        | Apbb2       | Bmp4        | Cacna1a     | Apbb2       | Bcl11a      | Cnr1        | H2-D1       | Crmp1       | Cnr1        | Casp3       | Mag         |
| Rap1gap     | Adarb1      | Agrn        | Agrn        | ApoE        | Cacna1a     | Camk2b      | ApoE        | Ptk2        | Cobl        | H2-K1       | Dpysl2      | Camk2b      | Cobl        | Cit         |
| Adarb1      | Arhgef28    | Ank3        | Ank3        | Bmpr1b      | Camk2b      | Cd24a       | Atp2b2      | Gfap        | Crabp2      | Lgals1      | Enah        | Crabp2      | Coro1a      | Myo5b       |
| Arhgef28    | Abl2        | Boc         | Boc         | Cacna1a     | Cd24a       | Cit         | Bmpr1b      | H2-D1       | Dlg4        | Lrp1        | Epha4       | Dlg4        | Fgf8        | Ntn1        |
| Abl2        | Agrn        | Ap2a1       | Ap2a1       | Ddr1        | Cit         | Cnr1        | Cacna1a     | H2-K1       | Eef2k       | Arhgap4     | Epha8       | Eef2k       | Fz9d        | Ntrk3       |
| Agrn        | Ank3        | Apbb2       | Apbb2       | Camk2a      | Cnr1        | Cobl        | Camk2a      | Jag1        | Enc1        | Mag         | Ephb3       | Enc1        | Gclm        | Pak1        |
| Ank3        | Boc         | ApoE        | ApoE        | Camk2b      | Cobl        | Crabp2      | Camk2b      | Lgals1      | Epha4       | Ngrf        | Ext1        | Epha4       | Glp1r       | Pou4f2      |
| Boc         | Ap2a1       | Atp2b2      | Atp2b2      | Runx3       | Crabp2      | Crmp1       | Runx3       | Lrp1        | Bcl11a      | Ntn1        | Fgf8        | Bcl11a      | Grik5       | Ptprs       |
| Ap2a1       | Apbb2       | Bmp4        | Prdm1       | Cit         | Crmp1       | Dpysl2      | Cit         | Arhgap4     | Fgfr1       | Pmp22       | Flot1       | Fgfr1       | Lrp1        | Sema3f      |
| Apbb2       | ApoE        | Bmpr1b      | Bmp4        | Cobl        | Dpysl2      | Dlg4        | Cobl        | Mag         | Fn1         | Ptprs       | Gap43       | Fn1         | Mag         | Sema4a      |
| ApoE        | Atp2b2      | Cacna1a     | Bmpr1b      | Crabp2      | Dlg4        | Eef2k       | Crabp2      | Ngrf        | Ikbkb       | Stmn2       | Gbx2        | Ikbkb       | Mt3         | Sema6b      |
| Atp2b2      | Prdm1       | Ddr1        | Cacna1a     | Crmp1       | Dil1        | Enc1        | Crmp1       | Notch1      | Map1b       | Sema3f      | Foxd1       | Impact      | Mybl2       | Sema6c      |
| Prdm1       | Bmp4        | Camk2a      | Ddr1        | Dpysl2      | Eef2k       | Epha4       | Dpysl2      | Ntn1        | Myo5b       | Matn2       | Map1b       | Matn2       | Nfi         | Sema7a      |
| Bmp4        | Bmpr1b      | Camk2b      | Camk2a      | Dcl1        | Enc1        | Ephb3       | Dcl1        | Pmp22       | Neu1        | Sema6b      | Ngrf        | Myo5b       | Ngrf        | Tiam1       |
| Bmpr1b      | Cacna1a     | Casp3       | Camk2b      | Dlg4        | Epha4       | Bcl11a      | Dlg4        | Pou4f2      | NF1         | Sema6c      | Ntn1        | Sema6c      | Prkcg       | Nrn1        |
| Tspo        | Ddr1        | Runx3       | Casp3       | Eef2k       | Ephb3       | Ptk2        | Eef2k       | Ptprs       | Ngrf        | Sema7a      | Etv4        | Neurod1     | Prkci       | Twf2        |
| Cacna1a     | Camk2a      | Cd24a       | Runx3       | Enah        | Bcl11a      | Fgfr1       | Enah        | Stmn2       | Ntn1        | Thy1        | Pou4f2      | NF1         | Lgmn        | Cpne5       |
| Ddr1        | Camk2b      | Cit         | Cd24a       | Epha4       | Ptk2        | Fn1         | Epha4       | Sema3f      | Ntrk3       | Tsc2        | Ptch1       | Ngrf        | Sod1        | Sema4g      |
| Camk2a      | Casp3       | Cnr1        | Cit         | Epha8       | Fgfr1       | Gfap        | Epha8       | Sema4a      | P2ry2       | Dpysl3      | Reln        | Ntn1        | Sod2        | Cpne1       |
| Camk2b      | Runx3       | Cobl        | Cnr1        | Ephb3       | Fn1         | H2-D1       | Ephb3       | Sema6b      | Pak1        | Vim         | Robo1       | Ntrk3       | Srp2k       | Dbn1        |
| Casp3       | Cd24a       | Crabp2      | Cobl        | Bcl11a      | Gfap        | H2-K1       | Bcl11a      | Sema6c      | Palm        | Klk8        | P2ry2       | Hdac4       | Map3k13     | Map3k13     |
| Runx3       | Cit         | Crmp1       | Crabp2      | Ext1        | H2-D1       | Ikbkb       | Ext1        | Sema7a      | Prkci       | Sema4g      | Pak1        | Sbxp1       | Cyfp2       | Cyfp2       |
| Cd24a       | Cnr1        | Dpysl2      | Crmp1       | Ptk2        | H2-K1       | Kif13b      | Ptk2        | Cntn2       | Pou4f2      | Rtn4r2      | Sema6b      | Paln        | Trp73       | Trp73       |
| Cdh1        | Cobl        | Dcl1        | Dpysl2      | Fgf8        | Ikbkb       | Lgals1      | Fgf8        | Thy1        | Reln        | Lrig2       | Sema6c      | Prkci       | Vegfb       | Vegfb       |
| Celsr1      | Crabp2      | Dlg4        | Dcl1        | Flot1       | Impact      | Lrp1        | Flot1       | Trp73       | Robo1       | Rap1gap2    | Sema7a      | Pou4f2      | Wfs1        | Wfs1        |
| Cit         | Crmp1       | Eef2k       | Dlg4        | Fn1         | Jag1        | Arhgap4     | Fn1         | Tsc2        | Stmn2       | Carm1       | Cntn2       | Rara        | Axl         | Axl         |
| Cnr1        | Dpysl2      | Enah        | Eef2k       | Gap43       | Kif13b      | Mag         | Gap43       | Dpysl3      | Sema7a      | Ctsz        | Rnf165      | Reln        | Vstm2l      | Vstm2l      |
| Cobl        | Dcl1        | Enc1        | Enah        | Gbx2        | Lgals1      | Map1b       | Gbx2        | Vim         | Skil        | Itm2c       | Plexn1      | Robo1       | Ctsz        | Ctsz        |
| Crabp2      | Dlg4        | Epha4       | Enc1        | Gja1        | Lrp1        | Myo5b       | Foxd1       | Klk8        | Creb3l2     | Nfatc4      | Sema4g      | Stmn2       | Fam162a     | Fam162a     |
| Crmp1       | Dil1        | Epha8       | Epha4       | Foxd1       | Rac3        | Neu1        | Kif13b      | Sema4g      | Ptk5        |             | Pla2g10     | Sema7a      | Pigt        | Pigt        |
| Dpysl2      | Eef2k       | Ephb3       | Epha8       | Impact      | Arhgap4     | NF1         | Stmn1       | Rtn4r2      | Ppp2r5d     |             | Vstm2l      | Skil        | Trim2       | Trim2       |
| Dcl1        | Enah        | Bcl11a      | Ephb3       | Kif13b      | Mag         | Ngrf        | Arhgap4     | Lrig2       | Tiam1       |             | Nrcam       | Sox11       |             |             |
| Dlg4        | Enc1        | Ext1        | Bcl11a      | Stmn1       | Map1b       | Ntn1        | Mag         | Rap1gap2    | Tsc2        |             | Cdc3l2      | Creb3l2     |             |             |
| Dil1        | Epha2       | Ptk2        | Ext1        | Lifr        | Myo5b       | Ntrk3       | Matn2       | Zhx2        | Dpysl3      |             | Bcl11b      | Ptk5        |             |             |
| Dil3        | Epha4       | Fgf8        | Ptk2        | Arhgap4     | Neu1        | P2ry2       | Map1a       | Carm1       | Tbc1d24     |             | Cyfp2       | Ppp2r5d     |             |             |
| Eef2k       | Epha8       | Fgfr1       | Fgf8        | Mag         | Neurod1     | Pak1        | Map1b       | Ctsz        | Zmynd8      |             | Vangl2      | Tiam1       |             |             |
| Enah        | Ephb3       | Flot1       | Fgfr1       | Matn2       | NF1         | Palm        | Myo5b       | Itm2c       | Plexn1      |             |             | Tsc2        |             |             |
| Enc1        | Bcl11a      | Fn1         | Flot1       | Map1a       | Ngrf        | Prkci       | Ngrf        | Cas21       | Pacsin1     |             |             | Dpysl3      |             |             |
| Epha2       | Ext1        | Gap43       | Fn1         | Map1b       | Mycn        | Pmp22       | Notch1      | Twf2        |             |             |             | Tbc1d24     |             |             |
| Epha4       | Ptk2        | Gbx2        | Gap43       | Myo5b       | Notch1      | Pou4f2      | Ntn1        | Cpne5       |             |             |             | Zmynd8      |             |             |
| Epha8       | Fgf8        | Gfap        | Gbx2        | Ngrf        | Ntn1        | Ptprs       | Tbc1d24     | Ankrd27     |             |             |             | Plexn1      |             |             |
| Ephb3       | Fgfr1       | Gfra1       | Gfap        | Notch1      | Ntrk3       | Reln        | Ntrk3       | Mapk6       |             |             |             | Pacsin1     |             |             |
| Bcl11a      | Flot1       | Gja1        | Gfra1       | Ntn1        | P2ry2       | Robo1       | Pak1        | Dbn1        |             |             |             | Twf2        |             |             |
| Ext1        | Fn1         | H2-D1       | Gja1        | Tbc1d24     | Pak1        | Stmn2       | Etv4        | Shank3      |             |             |             | Cpne5       |             |             |
| Ptk2        | Gap43       | H2-K1       | Gnat2       | Ntrk3       | Palm        | Sema3f      | Pmp22       | Actr2       |             |             |             | Ankrd27     |             |             |
| Fgf8        | Gbx2        | Foxd1       | H2-D1       | Pak1        | Prkci       | Sema4a      | Pou4f2      | Dab2ip      |             |             |             | Dab2ip      |             |             |
| Fgfr1       | Gfap        | Ikbkb       | H2-K1       | Etv4        | Pmp22       | Sema6b      | Ptch1       | Ptk7        |             |             |             | Mapk6       |             |             |
| Flot1       | Gfra1       | Impact      | Foxd1       | Pmp22       | Pou4f2      | Sema6c      | Ptprs       | Map3k13     |             |             |             | Dbn1        |             |             |
| Fn1         | Gja1        | Atcay       | Ikbkb       | Pou4f2      | Ptprs       | Sema7a      | Reln        |             |             |             |             | Shank3      |             |             |
| Fz9d        | Gnat2       | Kif13b      | Impact      | Ptch1       | Rara        | Sfrp1       | Robo1       |             |             |             |             | Actr2       |             |             |
| Gap43       | Nkx6-2      | Stmn1       | Atcay       | Ptprs       | Reln        | Skil        | Sema3f      |             |             |             |             | Dab2ip      |             |             |
| Gas6        | H2-D1       | Lgals1      | Kif13b      | Rac2        | Robo1       | Creb3l2     | Sema4a      |             |             |             |             | Ptk7        |             |             |
| Gbx2        | H2-K1       | Lifr        | Stmn1       | Reln        | Stmn2       | Cntn2       | Sema6b      |             |             |             |             | Map3k13     |             |             |
| Gfap        | Foxd1       | Lrp1        | Lgals1      | Robo1       | Sema3f      | Ptk5        | Sema6c      |             |             |             |             | Kdm4c       |             |             |
| Gfra1       | Ikbkb       | Rac3        | Lifr        | Sema3f      | Sema4a      | Ppp2r5d     | Sema7a      |             |             |             |             | Lin28a      |             |             |
| Gja1        | Impact      | Arhgap4     | Lrp1        | Sema4a      | Sema6b      | Thy1        | Skil        |             |             |             |             |             |             |             |
| Gnat2       | Jag1        | Mag         | Rac3        | Sema6b      | Sema6c      | Tiam1       | Sod1        |             |             |             |             |             |             |             |
| Nkx6-2      | Atcay       | Matn2       | Arhgap4     | Sema6c      | Sema7a      | Tsc2        | Sbxp1       |             |             |             |             |             |             |             |
| H2-D1       | Kif13b      | Mmp2        | Mag         | Sema7a      | Sfrp1       | Dpysl3      | Cntn2       |             |             |             |             |             |             |             |
| H2-K1       | Stmn1       | Map1a       | Matn2       | Skil        | Skil        | Vim         | Thy1        |             |             |             |             |             |             |             |
| Hes2        | Lgals1      | Map1b       | Mmp2        | Sbxp1       | Sox11       | Tbc1d24     | Tiam1       |             |             |             |             |             |             |             |
| Foxd1       | Lifr        | Myo5b       | Map1a       | Cntn2       | Creb3l2     | Zmynd8      | Tsc2        |             |             |             |             |             |             |             |
| Ikbkb       | Lrp1        | Neu1        | Map1b       | Thy1        | Cntn2       | Arhgap33    | Uchl1       |             |             |             |             |             |             |             |
| Il6st       | Rac3        | NF1         | Myo5b       | Tiam1       | Ptk5        | Plexn1      | Vim         |             |             |             |             |             |             |             |
| Impact      | Mcoln3      | Ngrf        | Neu1        | Tsc2        | Ppp2r5d     | Pacsin1     | Tbc1d24     |             |             |             |             |             |             |             |
| Jag1        | Arhgap4     | Notch1      | Neurod1     | Uchl1       | Thy1        | Twf2        | Rnf165      |             |             |             |             |             |             |             |
| Atcay       | Mag         | NF1         | Vim         | Tiam1       | Cpne5       | Arhgap33    |             |             |             |             |             |             |             |             |
| Kif13b      | Matn2       | Tbc1d24     | Ngrf        | Tbc1d24     | Trp73       | Ankrd27     | Plexn1      |             |             |             |             |             |             |             |
| Stmn1       | Mmp2        | Ntrk3       | Notch1      | Rnf165      | Tsc2        | Klk8        | Twf2        |             |             |             |             |             |             |             |
| Ldlr        | Map1a       | P2ry2       | Ntn1        | Arhgap33    | Dpysl3      | Sema4g      | Ankrd27     |             |             |             |             |             |             |             |
| Lef1        | Map1b       | Pak1        | Tbc1d24     | Nrn1        | Vim         | Rtn4r2      | Sema4g      |             |             |             |             |             |             |             |
| Lgals1      | Myo5b       | Palm        | Ntrk3       | Plexn1      | Tbc1d24     | Lrig2       | Pla2g10     |             |             |             |             |             |             |             |
| Lifr        | Neu1        | Etv4        | P2ry2       | Pacsin1     | Zmynd8      | Prex1       | Vstm2l      |             |             |             |             |             |             |             |
| Lrp1        | Neurod1     | Prkci       | Pak1        | Twf2        | Arhgap33    | Nrcam       | Nrcam       |             |             |             |             |             |             |             |
| Rac3        | NF1         | Pmp22       | Palm        | Cpne5       | Plexn1      | Rap1gap2    | Adcy1       |             |             |             |             |             |             |             |
| Mcoln3      | Ngrf        | Pou4f2      | Etv4        | Kif20b      | Pacsin1     | Mapk6       | Cdc4l1      |             |             |             |             |             |             |             |
| Arhgap4     | Mycn        | Ptch1       | Prkci       | Nyap1       | Twf2        | Srcin1      | Srcin1      |             |             |             |             |             |             |             |
| Mag         | Notch1      | Ptprs       | Pmp22       | Ankrd27     | Cpne5       | Dbn1        | Dbn1        |             |             |             |             |             |             |             |
| Matn2       | Ntn1        | Rac2        | Pou4f2      | Klk8        | Ankrd27     | Shank3      | Bcl11b      |             |             |             |             |             |             |             |
| Mmp2        | Tbc1d24     | Reln        | Ptch1       | Sema4g      | Klk8        | Carm1       | Shank3      |             |             |             |             |             |             |             |
| Mt3         | Ntrk3       | Robo1       | Ptprs       | Pla2g10     | Sema4g      | Ctsz        | Actr2       |             |             |             |             |             |             |             |
| Map1a       | P2ry2       | Stmn2       | Rac2        | Cpne1       | Cpne1       | Itm2c       | Map3k13     |             |             |             |             |             |             |             |
| Map1b       | Pak1        | Sema3f      | Reln        | Vstm2l      | Rtn4r2      | Actr2       | Nfatc4      |             |             |             |             |             |             |             |
| Myo5b       | Palm        | Sema4a      | Robo1       | Nrcam       | Lrig2       | Dab2ip      | Cyfp2       |             |             |             |             |             |             |             |
| Neu1        | Etv4        | Sema6b      | Rpgr        | Adcy1       | Prex1       | Ptk7        | Vangl2      |             |             |             |             |             |             |             |
| Neurod1     | Prkci       | Sema6c      | Stmn2       | Cdc4l1      | Nrcam       | Map3k13     | Ophn1       |             |             |             |             |             |             |             |
| NF1         | Pmp22       | Sema7a      | Sema3f      | Srcin1      | Rap1gap2    | Nfatc4      |             |             |             |             |             |             |             |             |
| Ngrf        | Pou4f2      | Sfrp1       | Sema4a      | Dbn1        | Zhx2        |             |             |             |             |             |             |             |             |             |
| Mycn        | Prom1       | Skil        | Sema6b      | Bcl11b      | Mapk6       |             |             |             |             |             |             |             |             |             |
| Notch1      | Ptch1       | Sod1        | Sema6c      | Shank3      | Srcin1      |             |             |             |             |             |             |             |             |             |
| Ntn1        | Ptprs       | Creb3l2     | Sema7a      | Actr2       | Dbn1        |             |             |             |             |             |             |             |             |             |
| Tbc1d24     | Rac2        | Stx3        | Sfrp1       | Dab2ip      | Bcl11b      |             |             |             |             |             |             |             |             |             |
| Ntrk3       | Rara        | Sbxp1       | Skil        | Map3k13     | Shank3      |             |             |             |             |             |             |             |             |             |
| P2ry2       | Reln        | Cntn2       | Sod1        | Nfatc4      | Carm1       |             |             |             |             |             |             |             |             |             |
| Pak1        | Robo1       | Ptk5        | Sod2        | Cyfp2       | Ctsz        |             |             |             |             |             |             |             |             |             |
| Palm        | Rpgr        | Ppp2r5d     | Creb3l2     | Vangl2      | Itm2c       |             |             |             |             |             |             |             |             |             |
| Etv4        | Stmn2       | Thy1        | Stx3        | Actr2       | Actr2       |             |             |             |             |             |             |             |             |             |
| Prkci       | Sema3f      | Tiam1       | Sbxp1       | Dab2ip      | Dab2ip      |             |             |             |             |             |             |             |             |             |
| Pmp22       | Sema4a      | Tsc2        | Cntn2       | Cas21       | Cas21       |             |             |             |             |             |             |             |             |             |
| Pou4f2      | Sema6b      | Tulp1       | Ptk5        | Ptk7        |             |             |             |             |             |             |             |             |             |             |
| Prom1       | Sema6c      | Uchl1       | Ppp2r5d     | Map3k13     |             |             |             |             |             |             |             |             |             |             |
| Ptch1       | Sema7a      | Dpysl3      | Thy1        | Nfatc4      |             |             |             |             |             |             |             |             |             |             |
| Ptprs       | Sfrp1       | Vim         | Tiam1       | Kdm4c       |             |             |             |             |             |             |             |             |             |             |
| Rac2        | Skil        | Tbc1d24     | Trp73       | Lin28a      |             |             |             |             |             |             |             |             |             |             |
| Rara        | Sod1        | Rnf165      | Tsc2        |             |             |             |             |             |             |             |             |             |             |             |
| Reln        | Sod2        | Zmynd8      | Tulp1       |             |             |             |             |             |             |             |             |             |             |             |
| Robo1       | Sox11       | Arhgap33    | Uchl1       |             |             |             |             |             |             |             |             |             |             |             |
| Rpgr        | Sox4        | Nrn1        | Dpysl3      |             |             |             |             |             |             |             |             |             |             |             |
| Stmn2       | Stat3       | Plexn1      | Vim         |             |             |             |             |             |             |             |             |             |             |             |







**Table S7 (Related to Figure 5).** Disease association of RNF12-regulated genes from the neural crest cell differentiation GO term (GO:0014033).

| Protein name                        | Gene name   | Neural crest function                                                                                                                                                                                                                                                                                                                                                       | Craniofacial defects association                                                                 |
|-------------------------------------|-------------|-----------------------------------------------------------------------------------------------------------------------------------------------------------------------------------------------------------------------------------------------------------------------------------------------------------------------------------------------------------------------------|--------------------------------------------------------------------------------------------------|
| Annexin A6                          | Anxa6       | Modulates chick cranial neural crest cell emigration (Wu and Taneyhill, 2012)                                                                                                                                                                                                                                                                                               | Associated to Treacher Collins syndrome (Dixon et al., 1994)                                     |
| Bone morphogenetic protein 4        | Bmp4        | Regulates neural crest migration and differentiation (Li et al., 2018; Sela-Donenfeld and Kalcheim, 1999; Zhu et al., 2019)<br>Regulates tooth morphogenesis (Jia et al., 2016; Shin et al., 2012)                                                                                                                                                                          | Associated to Non-syndromic cleft lip (Chen et al., 2012, 2014)                                  |
| Fibronectin                         | Fn1         | Participate in differentiation of NC cells into vascular smooth muscle cells (Wang and Astrof, 2016)                                                                                                                                                                                                                                                                        |                                                                                                  |
| Homeobox protein GBX-2              | Gbx2        | Required for pharyngeal arch and cardiovascular development (Byrd and Meyers, 2005)<br>Participates in neural crest induction (Li et al., 2009)                                                                                                                                                                                                                             | Associated to craniofacial microsomia (Zhang et al., 2016)                                       |
| Protein jagged-1                    | Jag1        | Induces neural crest stem cell self-renewal and osteoblast differentiation (Kamalakar et al., 2019; Nikopoulos et al., 2007)<br>Regulates face development (Zuniga et al., 2010)<br>Regulates specification of the coronal suture (Yen et al., 2010)<br>Regulates maxillary ossification (Hill et al., 2014)<br>Regulates bone patterning of middle ear (Teng et al., 2017) | Deleted in Alagille Syndrome (Humphreys et al., 2012; Micaglio et al., 2019; Pilia et al., 1999) |
| Laminin subunit alpha-5             | Lama5       | Regulates neural crest cell migration (Coles et al., 2006)<br>Required for tooth development (Fukumoto et al., 2006)                                                                                                                                                                                                                                                        |                                                                                                  |
| Semaphorin-3F                       | Sema3f      | Regulates cranial neural crest cell migration (York et al., 2018; Yu and Moens, 2005)<br>Regulates trunk neural crest migration (Gammill et al., 2006)                                                                                                                                                                                                                      |                                                                                                  |
| Semaphorin-4A                       | Sema4a      | Phylogenetic-based functional annotation                                                                                                                                                                                                                                                                                                                                    |                                                                                                  |
| Semaphorin-4G                       | Sema4g      | Phylogenetic-based functional annotation                                                                                                                                                                                                                                                                                                                                    |                                                                                                  |
| Semaphorin-6B                       | Sema6b      | Patterns cardiac neural crest migration (Toyofuku et al., 2008)                                                                                                                                                                                                                                                                                                             |                                                                                                  |
| Semaphorin-6C                       | Sema6c      | Phylogenetic-based functional annotation                                                                                                                                                                                                                                                                                                                                    |                                                                                                  |
| Semaphorin-7A                       | Sema7a      | Expressed in cranial and trunk neural crest cells (Bao and Jin, 2006)                                                                                                                                                                                                                                                                                                       | Associated to craniofacial microsomia (Zhang et al., 2016)                                       |
| Secreted frizzled-related protein 1 | Sfrp1       | Expressed in migrating neural crest cells (Duprez et al., 1999)<br>Regulates Periodontal Mineral Homeostasis (Gopinathan et al., 2019)                                                                                                                                                                                                                                      |                                                                                                  |
| Transcription factor SOX-11         | Sox11       | Expressed in neural crest and derivatives (Hargrave et al., 1997; Sock et al., 2004)<br>Ablation generates Clefing of the Secondary Palate (Huang et al., 2016)<br>Linked to cranial vault shape in humans (Roosenboom et al., 2018)                                                                                                                                        |                                                                                                  |
| Mitogen-activated protein kinase 3  | Mapk3, Erk1 | Expressed in neural crest and derivatives (Parada et al., 2015)                                                                                                                                                                                                                                                                                                             |                                                                                                  |

**Table S8 (Related to STAR Methods).** Primer and Oligonucleotide sequences

| Oligonucleotides                           |                                                                   |                                                               |
|--------------------------------------------|-------------------------------------------------------------------|---------------------------------------------------------------|
| qRT-PCR primers                            | Forward (5'-3')                                                   | Reverse (5'-3')                                               |
| FoxP1 ex15-16                              | CACGTGGAAGAATG<br>CAGTGCG                                         | N/A                                                           |
| FoxP1 ex15-16b                             | CACGTGGAAGGGTG<br>CCATTC                                          | N/A                                                           |
| FoxP1 ex17                                 | N/A                                                               | TGAGAGGTGTGCAG<br>TAGGCG                                      |
| Gapdh                                      | CTCGTCCCCTAGAC<br>AAAA                                            | TGAATTTGCCGTGA<br>GTGG                                        |
| Ntn1                                       | CGCAACTGTACCAG<br>TGACCTCT                                        | TTGCGGCAGTAGAT<br>GAGGACGA                                    |
| Dll1                                       | ACCAAGTGCCAGTC<br>ACAGAG                                          | TCCATCTTACACCTC<br>AGTCGC                                     |
| Kif1a                                      | CACCACTATTGTCAA<br>CCCCAAA                                        | CCCCAATGTCCCTG<br>TAGACCT                                     |
| Gfap                                       | CAATGCTGGCTTCA<br>AGGAGACACG                                      | TCAGTTCAGCTGCC<br>AGCGCCT                                     |
| Unc5a                                      | GTCTGGTGTGTGAC<br>TGTAGGCA                                        | CCGAGCATGGAGGT<br>TGCAGTTG                                    |
| Primers for genomic DNA sequencing         | Forward (5'-3')                                                   | Reverse (5'-3')                                               |
| Srpk1 (KO)                                 | TGACTAACAGGCA<br>CTGTCAGG                                         | CAGGCTCTGGTGAG<br>ACCTAGC                                     |
| Srpk2 (KO)                                 | GTAGAGTAACTGTC<br>TCTGTAACTTGTGT<br>ACTG                          | CTATAAAGCTGGAC<br>CAGGAGAGGC                                  |
| Zfp42/Rex1 (KO)                            | TCACCATGGGCTCT<br>CGTATTGG                                        | AGAAGACTCGAGAA<br>GGGAAGCTCG                                  |
| Rlim 4xSA/y (KI)                           | AGAGCAAGAGCTGA<br>AAGAGCCAGGGCAC<br>CTTTACAGCCAACA<br>AGTGAAATTCC | GTTTCTACGATGCT<br>CTGGGGCCCCGGGC<br>TCTTGCCCTCCTCT<br>GAGCACG |
| Rlim $\Delta$ SR-motif/y (KI)              | CCTTTACAGCCAAC<br>AAGTGAAATTCC                                    | ACGCGTAGTCGGCA<br>CTTCTG                                      |
| Rlim W576Y/y (KI), W576Y/y (KI), WT/y (KI) | ACAGCCTCAGCATC<br>TTCTAGAGC                                       | AGTGCATTGGAAAA<br>GTAAGTGGCC                                  |
| gRNA sequences for CRISPR/Cas9             | Sense gRNA (5'-3')                                                | Antisense gRNA (5'-3')                                        |
| Srpk1 (KO)                                 | GAGCAGGAGGAGG<br>AGATTCT                                          | GCGGAGTGGGGTG<br>CAGAGCCT                                     |
| Srpk2 (KO)                                 | GATTGATGACTTCAA<br>GATCTC                                         | GATGTCTTTGTTTGG<br>GTCACCT                                    |
| Zfp42/Rex1 (KO)                            | GAGGAAGATGGCTT<br>CCCTGA                                          | GAATCTCACTTTCAT<br>CCCGGA                                     |
| Rlim 4xSA/y (KI)                           | GAGTTCGTCCTGGA<br>GAATAC                                          | GTAAGTGAAGATCA<br>AGAACTA                                     |
| Rlim $\Delta$ SR-motif/y (KI)              | GAAGCCGGAGCCCA<br>GAGCAT                                          | GCTCCTCTGAGCTC<br>TGGTGGT                                     |
| Rlim W576Y/y (KI), W576Y/y (KI), WT/y (KI) | GCAGGGCAGTCTTA<br>TCTTCT                                          | GTGGAATTCTCAGA<br>CAACCAG                                     |
